# Supplementary material for: Maternal LSD1/KDM1A is an essential regulator of chromatin and transcription landscapes during zygotic genome activation
Source: eLife journal article supplement (doi:10.7554/elife.08851), 2016-02-02
Supplement: supp [file elife-08851-supp-v1.zip]

Archive with 9 entries (9 files):
- elife_poa_e08851_Supplementary_File_1.xlsx
- elife_poa_e08851_Figure_1_figure_supplement_2.pdf
- elife_poa_e08851_Figure_4_figure_supplement_2.pdf
- elife_poa_e08851_Figure_1_figure_supplement_1.pdf
- elife_poa_e08851_Figure_4_figure_supplement_1.pdf
- elife_poa_e08851_Figure_3_figure_supplement_1.pdf
- elife_poa_e08851_Figure_5_figure_supplement_2.pdf
- elife_poa_e08851_Supplementary_File_2.xls
- elife_poa_e08851_Figure_5_figure_supplement_1.pdf
