# Supplementary material for: Maternal LSD1/KDM1A is an essential regulator of chromatin and transcription landscapes during zygotic genome activation
Source: eLife journal article supplement (doi:10.7554/elife.08851), 2016-02-02
Supplement: supp [file elife-08851-supp-v1.zip › elife_poa_e08851_Figure_4_figure_supplement_2.pdf]

**A** mutant versus control comparison for the two developmental stages

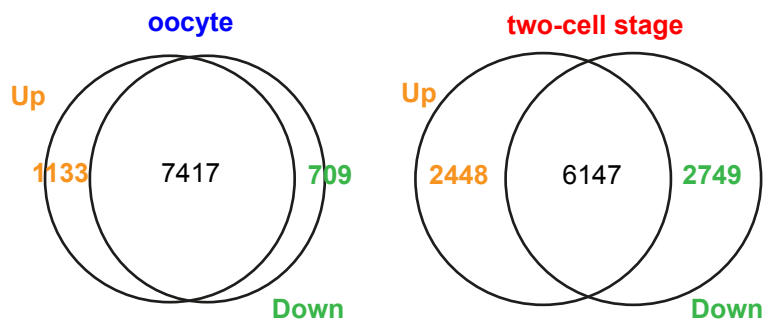

**B** principal component analysis for mutant versus control at two developmental stages (oocyte and two-cell stage)

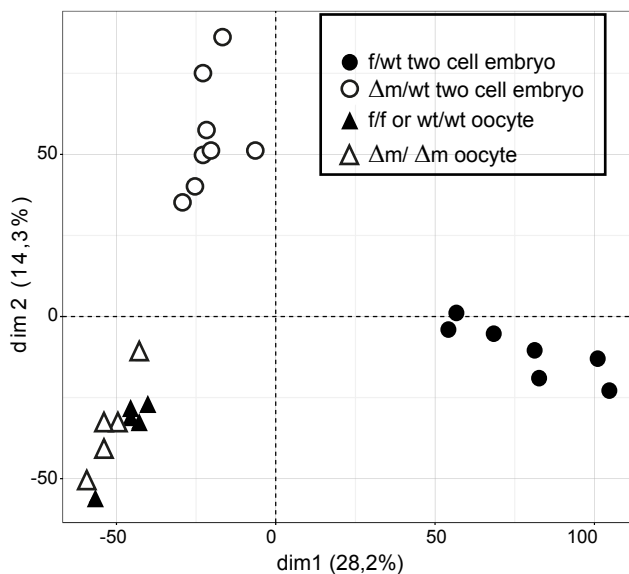

**C** developmental stage comparison for misregulated genes

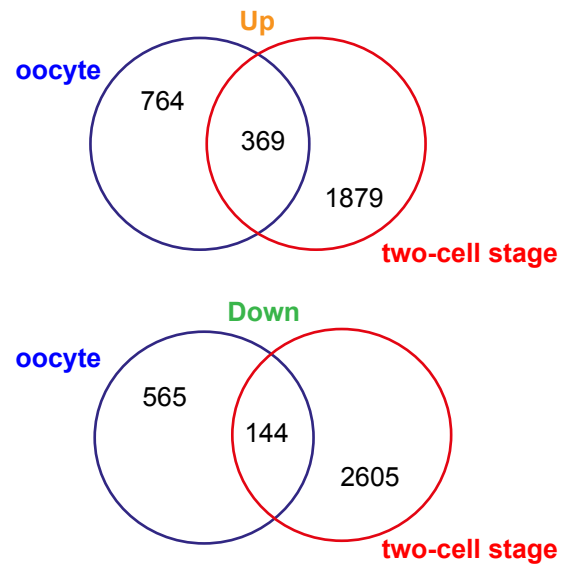

**D** upregulated in maternally deficient KDM1A oocytes

| pathway term                             | p value             | enrichment |
|------------------------------------------|---------------------|------------|
| ribonucleoprotein complex biogenesis     | $2,1 \cdot 10^{-2}$ | 2,7        |
| mitotic cell cycle process               | $1,2 \cdot 10^{-3}$ | 2,4        |
| mitotic cell cycle                       | $3,5 \cdot 10^{-3}$ | 2,3        |
| cellular macromolecular complex assembly | $7,2 \cdot 10^{-3}$ | 2,3        |
| organelle fission                        | $3,6 \cdot 10^{-2}$ | 2,1        |
| RNA processing                           | $2 \cdot 10^{-2}$   | 2,0        |

downregulated in maternally deficient KDM1A oocytes

| pathway term                   | p value             | enrichment |
|--------------------------------|---------------------|------------|
| epithelial tube morphogenesis  | $1,4 \cdot 10^{-3}$ | 3,4        |
| gland development              | $4,3 \cdot 10^{-4}$ | 3,3        |
| tube morphogenesis             | $1,9 \cdot 10^{-3}$ | 3,2        |
| morphogenesis of an epithelium | $2,4 \cdot 10^{-4}$ | 2,9        |
| tissue morphogenesis           | $6,5 \cdot 10^{-5}$ | 2,8        |
| cell division                  | $1,7 \cdot 10^{-2}$ | 2,8        |
