# Supplementary material for: Maternal LSD1/KDM1A is an essential regulator of chromatin and transcription landscapes during zygotic genome activation
Source: eLife journal article supplement (doi:10.7554/elife.08851), 2016-02-02
Supplement: supp [file elife-08851-supp-v1.zip › elife_poa_e08851_Supplementary_File_1.xlsx]

## Sheet: Ancelin et al_ Table 1
						Summary of RNA deep sequencing data
Samples			Raw reads	N > 5%	AT ≥ 80%	Continuous A	Continuous T	Filtered reads	Rate after filtering (%)	TopHat		Bowtie
										Mapped Reads	Mapped Rate	Mapped Reads	Mapped Rate
											(%)		(%)
Controls	oocytes	OoFlox1	17576927	826	1920659	1417539	6145670	9608663	54.6663	8130681	84.6182	7028428	73.92
		Oowt1	7 937 091	646	2292414	1359540	1733052	4390023	55.31	3926436	89.44	3394493	77.32
		Oowt2	6 227 046	546	818 482	487 788	645 007	4926234	77.11	4551775	92.3987	3896058	79.09
		Oowt3	6 863 187	574	1 569 412	1 037 485	1 163 213	4482107	65.31	4063866	90.6687	3577310	79.81
		Oowt4	6 490 335	514	2 072 120	1 297 762	1 454 821	3498914	53.91	3216271	91.922	2884786	82.45
	two-cell stage	floxE1	14120390	2433	1305593	1115966	4006882	8873796	62.8438	8002545	90.1818	5663354	63.8249
		floxE2	12449797	2177	2475957	2254029	4630382	5486890	44.0721	4861338	88.5992	3440737	62.7142
		floxE3	33397769	293	7425391	7395702	11804538	13979929	41.8589	12741590	91.142	10556709	75.5217
		floxE4	14040609	315	600852	297101	967085	12484917	88.9201	11795409	94.4773	10629526	85.1425
		floxE5	15377826	354	486988	111553	884424	14010065	91.1056	13369788	95.4299	12018925	85.791
		floxE6	17297484	406	3714449	2883490	1985272	11957921	69.131	10827108	90.5434	9738979	81.4482
		floxE7	14198161	324	1324651	458188	1327900	11593483	81.6548	10352504	89.2959	9287923	80.117
		floxE8	15857312	338	1772178	1139574	1445251	12816217	80.8221	12120963	94.5752	10953836	85.4708
Mutants	oocytes	Oo∆m1	20305802	1077	3475683	2986104	7138397	9972680	49.1125	7660301	76.8129	6834507	73.34
		Oo∆m2	17857248	1722	3955060	3341536	7966509	6219085	34.8267	4231778	68.045	3973069	65.98
		Oo∆m3	18904538	1844	3800499	2958814	8483265	7002139	37.0395	4654462	66.472	4347831	64.66
		Oo∆m4	15766450	1480	2282469	1507323	4968103	8800761	55.8195	7458490	84.7482	6968575	80.28
		Oo∆m5	15485576	1431	4504043	3996503	7140536	4176106	26.9677	2495517	59.757	2304378	57.48
	two-cell stage	∆mE1	15429054	2795	2242942	1923947	3824203	9527883	61.7529	8532570	89.5537	6122993	64.2846
		∆mE2	15100404	2619	5279031	4545295	5045569	5382866	35.6472	4705000	87.407	3216557	59.7875
		∆mE3	36570837	355	12909448	12261706	5855766	16804220	45.9498	16589383	98.7215	13660738	76.1708
		∆mE4	21146642	462	3961667	1220530	2296995	15015991	71.0089	10716591	71.3679	9490474	63.2178
		∆mE5	17039551	379	2228125	434540	1229220	13612768	79.8892	10643584	78.1882	9541005	70.1092
		∆mE6	15424234	316	3493201	2673163	2368050	9958461	64.5637	8992214	90.2972	8030990	80.6661
		∆mE7	15089630	350	478236	113824	1132140	13490811	89.4045	12857346	95.3045	11436221	84.7817
		∆mE8	17976808	412	4222141	2064273	2314636	11711708	65.149	8445541	72.1119	7565063	64.6107
					Dataset are available from GEO under access number GSE68139
