# Supplementary material for: Maternal LSD1/KDM1A is an essential regulator of chromatin and transcription landscapes during zygotic genome activation
Source: eLife journal article supplement (doi:10.7554/elife.08851), 2016-02-02
Supplement: supp [file elife-08851-supp-v1.zip › elife_poa_e08851_Supplementary_File_2.xls]

## Sheet: Table1-sup1_Upregulated-2Cell
gene	log2fc	pval
0610007P14Rik	1.98957538894835	0.00322282622529869
1110001J03Rik	2.28657918243942	0.00454117951733906
1110012L19Rik	5.64690709138765	5.702902644771e-12
1110019D14Rik	7.69570097865634	0.000345720977720739
1110037F02Rik	1.66077422615329	0.00726249199155844
1110051M20Rik	3.79474375479056	7.61854839331704e-07
1110058L19Rik	3.88500715552326	0.00165213928053337
1190007I07Rik	6.58631767851118	2.76816724828156e-05
1300002E11Rik	3.01034987607359	0.0203947096399662
1500011B03Rik	2.4685316754112	0.000198384129717353
1600002D24Rik	7.06406585772936	0.0010903920676561
1700001L05Rik	2.03198367135132	0.000928949959710234
1700021K19Rik	2.047004405469	0.00197506728985962
1700023E05Rik	3.51864887107226	0.0217435933123198
1700024P16Rik	3.25066637511556	0.000288426815863326
1700028K03Rik	1.70484592350405	0.0300013768093859
1700029F12Rik	1.98794128986314	0.0167835594534151
1700029P11Rik	2.87621558740742	0.000105333273480038
1810037I17Rik	3.38661912640515	7.25506703178337e-09
1810062G17Rik	2.53186324927726	0.0248514219338342
2010002M12Rik	3.20354995896698	0.000202252960365516
2010107G23Rik	1.24428984781281	0.0250478607153581
2210013O21Rik	3.3735836783812	1.97751971219262e-06
2210417A02Rik	Inf	6.66763944986088e-06
2300009A05Rik	4.35624821265302	0.0079328529127365
2310061I04Rik	1.74285473913532	0.00635340757425094
2310069G16Rik	2.81133735645001	1.99476815092265e-06
2410012M07Rik	2.8941254516736	0.0258881876563336
2610001J05Rik	3.98870370286294	2.78715117368519e-06
2700029M09Rik	2.94085295687314	2.86871082086348e-07
2700049A03Rik	3.30260280584258	2.40224586344808e-08
2700060E02Rik	2.23177573859164	9.45497150843689e-05
2700094K13Rik	3.93845647429722	0.00297903997462526
2810002D19Rik	3.59974481285086	0.0124072446172338
2810025M15Rik	2.28038710670002	0.000208158736454093
2810408I11Rik	1.75117829525769	0.00213123979626355
3110001I22Rik	1.63736003396477	0.0350884599463131
3110009E18Rik	4.0195926902078	0.00460285564372387
3110040N11Rik	4.80376643604018	1.42887431907663e-08
3110043O21Rik	1.6772318730943	0.0240502782711572
4430402I18Rik	4.55593654498984	0.00963390578052682
4921524J17Rik	1.53115912378434	0.0436889122535151
4921536K21Rik	3.56903215521627	0.00746505340222185
4930451I11Rik	4.38919076447692	0.000306482974706478
4930500J02Rik	1.97524482149183	0.00993659754083627
4930503L19Rik	4.2212762143545	0.0138892430480099
4930506M07Rik	2.54891443821979	0.000169873247373875
4930509E16Rik	5.50770082322193	2.54126151485361e-06
4930550C14Rik	3.81841945398392	3.50489801494123e-06
4930550L24Rik	5.10103980757899	0.00012510178033579
4930558C23Rik	2.80152749942752	0.0147356818282479
4931428L18Rik	2.14181765692035	0.000396924334546903
4933407G14Rik	3.61068459336229	0.00182347073340659
4933411E08Rik	1.66376828630524	0.044785280661328
4933427D06Rik	4.84050792655082	1.41091657281462e-10
4933427G17Rik	2.60832762775744	0.000194133228273184
5530601H04Rik	4.1582161646168	0.000397157192762266
5730403I07Rik	3.3395951421729	3.0338507086175e-05
5830473C10Rik	5.972363212248	0.00260947619544013
6430710C18Rik	3.49776635873955	8.0594248395562e-09
6720468P15Rik	2.43682913382955	0.000535048673049881
6720489N17Rik	1.55715128591818	0.0138573287441221
6820431F20Rik	2.12664587687083	0.000157116393714886
7420426K07Rik	4.12266862251234	3.39317959770584e-08
7420461P10Rik	3.85721482964041	1.00579983913732e-08
9030624J02Rik	2.50180311767637	0.000839656307936409
9130409I23Rik	2.19572287031077	0.0028808386450353
9230110C19Rik	2.0153163689637	0.0216297336656378
9330162012Rik	3.34221498031186	0.0132492883600328
A1bg	3.76856617982948	0.000299405697907536
A330093E20Rik	4.21488474329512	0.000309509225962013
A430033K04Rik	3.75673133867959	4.74536552300164e-07
A630095E13Rik	1.93653062058289	0.00963044820706957
A930017M01Rik	4.81210478796071	0.000589819388781918
AA536875	3.12974466719581	2.72306326170195e-06
AA545190	2.21118351858441	0.000131548421998603
AA619741	2.33286284781263	0.000363495626986369
AI314180	1.57561053689389	0.0124351164651416
AI987944	2.87209849391918	5.75023233747667e-06
AU015836	3.2419233541309	9.55874214372305e-09
AU016765	2.2716498813138	0.00018057478289205
AU022751	4.71316035438318	0.000750028988254223
AU040320	1.22080091631751	0.033173713623174
AW146154	2.58624182542973	0.00010603522705984
AW495222	3.31843822924051	0.000410124181974034
AW551984	4.07071691709461	0.00299474732604176
AW554918	1.51715787070612	0.0219820346604151
AY512915	2.4972250238611	0.000448670304658518
Aadac	3.63873536329502	0.0310134113832398
Aagab	3.41435077580606	0.00119979096245376
Aass	4.05153686847527	0.000250227343087508
Abca14	7.86577276318661	3.36629355984715e-07
Abca4	2.72116361996792	0.00791861647648599
Abcb11	4.18157162022883	0.0224984180821208
Abcb1a	4.14659799395714	0.00249363964347674
Abcb1b	3.40054127550651	2.2521157540914e-08
Abcd3	2.34126109504955	0.000924994143108475
Abcf3	3.10739188579503	5.71845515504778e-07
Abhd11	2.87598131444556	0.00706633022047319
Abhd13	1.96472846908003	0.000636130480431015
Abhd16a	1.84118136861544	0.0276531094573578
Abhd3	2.73335839293844	0.0437125048776164
Abhd4	1.53558082911217	0.00759009005795068
Ablim1	3.79807985108711	1.47802849645095e-05
Ablim3	2.5438617009919	0.00312696284098242
Abr	2.24369404679447	0.000934289612001098
Acad11	1.69798423315039	0.0355580881788945
Acadl	4.57281050105823	0.00277493274652894
Acap2	1.97716388578764	0.00162174403632547
Acbd3	2.22805375045998	3.12155611905544e-05
Acbd6	1.90714028818054	0.00209781907566403
Acbd7	2.96577532151961	3.27898604693841e-06
Accsl	1.84476414522092	0.000742245886041211
Acd	2.06999902187991	0.000311430050046115
Acer1	4.21813965047301	1.46116641311415e-06
Acot3	1.5956835563786	0.0409449583524688
Acox3	2.65128466828056	0.000175683487113062
Acp6	5.45135972227357	4.1579923132209e-11
Acpp	2.55234881696967	0.000684182178107097
Acrv1	7.50894209131103	0.000418471395832379
Actg1	1.26567380409011	0.026479970233625
Actg2	8.3030648161068	8.15362349379255e-18
Actn3	4.08025270225926	3.63584096942077e-06
Actr1a	1.99182690415293	0.000494120184926649
Actr8	3.34277701750685	0.000325504653956425
Ada	4.8395462759858	4.07781796475046e-11
Adamts3	3.15110909319912	0.000511992946882605
Adamts9	2.09496429388854	0.0386336689218066
Adamtsl1	2.68643932915384	1.97426702624989e-05
Adh5	1.48794503144151	0.0220325824355707
Adk	1.99567816125234	0.0188831016571664
Adm2	2.82070808404454	9.37107203285793e-05
Adtrp	3.04646758100509	4.26887329656847e-06
Aes	1.75176686644105	0.0221745463610849
Afap1	3.10528270556936	0.000444736264118967
Afap1l2	2.22288115063639	0.0105318688957005
Agap1	2.15773475854778	0.00251297727668138
Agbl2	4.46753234452132	0.00593458176341549
Agk	3.15857837563797	0.00141568064953529
Ago1	2.37002077923625	0.0137181242759882
Ago3	1.45708217964749	0.0161062022436061
Agpat3	2.43925092117177	0.0470274208187823
Agr3	3.10668022993103	0.0403668597498453
Agtpbp1	1.72545881595748	0.00838008515771976
Ahcy	2.83357824276893	0.0111609899199532
Ahnak	2.10892031209331	0.0147373465479676
Ahsa1	1.25675505330224	0.0247241253850146
Aim1	3.19927540582461	2.33004772790674e-06
Ak2	1.5328419391093	0.0260178078776469
Ak4	1.87026800777927	0.00460978308047452
Akap2	1.22344046428585	0.0263735991464613
Akap7	1.93029536390579	0.000490565990789359
Akip1	2.28447638035688	0.000157676839336517
Akirin2	1.45617226691008	0.00312163746392675
Aknad1	4.09312565544634	1.0326815380595e-05
Akr1a1	1.39012501180113	0.0242832353660168
Akr1b8	4.19012411413048	0.00138348721772731
Akr1cl	3.09414577154816	0.000108794153550797
Alcam	6.01897054868576	0.0159782503241944
Aldh18a1	1.62132233014826	0.0105197475547431
Aldh1a2	4.40425545153652	9.197826678907e-07
Aldh2	1.84256144023845	0.0169985087569136
Aldh3a2	2.55956315134472	0.000492425407704958
Aldh4a1	1.80719300606513	0.0310751635261899
Aldh5a1	3.55577234245868	2.56245581273836e-07
Aldh9a1	2.13432133900343	0.000119980736029292
Alg10b	1.81456123181027	0.0450611965377181
Alkbh5	1.25750310900907	0.0237464790793207
Als2cr11	Inf	1.55548920571389e-05
Ambra1	1.79724124329894	0.012655871772563
Amfr	1.45486644245786	0.0194151937964129
Ammecr1	3.94949052389406	0.00953672882923412
Amz2	3.00435532145355	0.000113315640055337
Anapc1	1.55615940031048	0.0103180025699355
Anapc10	1.52270680750507	0.0100515938727332
Angel2	1.32544149524386	0.0232307638364288
Angpt1	3.75437409120138	0.0215773533353248
Angptl2	2.28609764632366	0.000101674795446568
Ank	1.92057561115329	0.0131106003108721
Ankdd1b	2.63802907045732	0.0125138792128037
Ankra2	1.13888927796559	0.0325797892252596
Ankrd27	2.11066526785065	0.00205870624954386
Ankrd32	4.80954983096388	0.0013030798950972
Ankrd66	4.33266710150283	0.00819537824944881
Anks4b	6.80907262270004	0.0192692505859654
Ano2	6.47208321322803	0.00198343361940864
Ano7	5.96218319323471	1.65143573625571e-07
Antxr2	2.2836246525227	0.000651924267429834
Anxa1	Inf	4.1618954006509e-05
Anxa3	3.49703933344295	0.0328576295261138
Anxa4	6.40510179000534	5.93967576138915e-11
Anxa5	3.52909953799975	0.00149390258716225
Anxa6	4.33453269964324	9.44185504643779e-07
Anxa7	1.60358902767149	0.0031711128282206
Ap2b1	2.37988782143366	0.000179558025716162
Ap2m1	1.94605620111145	0.000930834107499377
Ap3b1	1.63270295550869	0.0188775196493135
Ap3b2	2.91767316987777	0.0189653765739362
Ap3m1	2.08972236504308	0.000150833478100417
Apba1	1.63405197166286	0.0490342666178268
Apip	3.51898682164122	3.77913762263775e-07
Apoo	1.51943291159068	0.0111839149097509
Appl2	8.30005466999737	7.97452553771439e-20
Arap1	3.47985395531472	0.0267914968315511
Arap3	4.97557140685096	0.0159355458936454
Arf1	2.28390803521895	0.0003280474345244
Arhgap12	1.73778242549796	0.00239250626142015
Arhgap18	4.54625203389042	0.000624779883695296
Arhgap20os	2.27817410545587	5.46623574528681e-05
Arhgap24	8.57515789947502	0.000365937261851935
Arhgap28	2.31393555107105	6.99786079590891e-05
Arhgap44	1.73453505262838	0.0442592674770961
Arhgef39	1.6415209981412	0.00505646786769889
Arhgef7	2.02775588649089	0.00126151210813954
Arid1b	2.10666633395076	0.00131304771694404
Arid5b	2.29241278753009	0.0201833486816365
Arl11	Inf	0.0368659779734803
Arl14epl	1.89003977707963	0.0185883134216478
Arl3	2.07808572659888	0.000876157185923629
Arl6	1.67854009303273	0.00283029693908495
Arl8a	3.48557398179746	7.31635417803219e-07
Armc10	1.78321398416487	0.003534155163913
Armc2	3.62947264508995	0.0296848350188815
Arntl	1.42098345579106	0.00599334986525942
Arpc5l	1.61548446021088	0.00414350002500807
Arpp19	1.86548523073034	0.000849383422250161
Arsb	3.3144426097314	8.63593365647838e-05
Arxes1	2.21335589433733	0.0396766520509525
Arxes2	3.98539168468443	0.00214966868825418
Asah2	3.5323125084835	9.79601650729576e-05
Asap2	2.97996984397806	0.00566566612111658
Asb15	2.60161824646599	0.00510532109639198
Asb4	1.54238685883568	0.0265543799794168
Asf1a	3.39242308987341	6.13535449654339e-06
Asf1b	1.98146587082114	0.00040145631748127
Asgr2	3.30721015072427	0.00686537184465813
Astl	2.48333768206563	0.00131341911991723
Astn1	4.29555019369253	0.0175930050695137
Asz1	3.17542718772138	0.000265776982103813
Atad1	1.85999182964086	0.000321464481237187
Atat1	1.70244841145364	0.0352290262462535
Atf6	2.50571460872423	0.0129452419636673
Atg10	5.32485430956926	2.38620344106821e-10
Atg12	1.92912477666341	0.00447435400439652
Atg3	1.66488033793552	0.00239866640495417
Atg5	1.5202657845966	0.00483679224479463
Atl2	1.87520985164974	0.00421443278498318
Atp10b	3.85710112768674	1.65342492021319e-07
Atp2b4	2.07681331074076	0.0055506084133815
Atp2c1	1.92077261692652	0.000597340884533851
Atp5l	2.23980386448805	0.000210131915079677
Atp6v0a4	2.92354514289661	0.0455743783306305
Atp6v0e2	3.40891079501913	0.00195907730860957
Atp6v1f	1.81240342669208	0.0154951412981345
Atp6v1h	2.40316087265402	4.04120584683755e-05
Atp8a1	2.74766348016794	0.000183685910457841
Atxn7l1	2.09994000987337	0.00963390578052682
Auh	3.55548935273134	1.88548281254344e-09
Aurkc	1.52752972088483	0.0104466662250701
Auts2	1.48693054290267	0.0364744110401923
Axin2	1.32915393364757	0.0485623743774485
B230118H07Rik	6.23590274527366	0.0149290782270031
B3galnt2	2.0426094751554	0.000979108594284683
B3gnt1	2.26601260888171	0.00963044820706957
B4galt4	3.77063417937211	3.10040109304275e-09
B9d1	3.35393766840609	1.51614182542604e-06
BC002163	2.1406659998964	0.0468357131195819
BC021767	1.64876329765397	0.00959730824115697
BC048502	3.24821407032863	3.7378809941245e-07
BC048546	2.71389241537074	0.0411316889255425
BC051019	4.19911682610037	6.27841342363707e-06
Bag4	1.26173936495238	0.0211151803257081
Baiap2l1	1.94665595074527	0.00639697516218217
Baiap2l2	4.02436539196596	4.35711586735334e-05
Banf1	1.3904313615324	0.0223109730742119
Bank1	4.69189644545066	0.000151689622063778
Baz2b	1.19778148003594	0.0328418746379699
Bbip1	3.00347147223871	8.92444837156097e-07
Bbs4	1.48502637234392	0.0426577000381591
Bbs9	1.88694511376305	0.00365090171782918
Bcar3	3.37652596276767	6.46933379211098e-08
Bcas1	4.59242442591839	1.84775061464779e-08
Bckdhb	2.3077600969523	0.00457351384082009
Bcl2l1	2.07541521531232	0.0166745328895668
Bcl2l10	3.61314322398747	2.16930032574076e-10
Bcr	2.35933307604116	0.00237507945246904
Bdh1	3.0135426579741	0.000175065751499059
Bend5	3.05056127610175	0.0342944939781117
Bet1	2.10623924080983	0.000305719570600279
Bgn	5.20242333560108	6.79468099082047e-05
Bhlhe41	2.75371786270398	0.000155375060072691
Bik	2.81148058146498	0.00089548711871047
Bin2	2.44026817839059	0.0426865551402717
Bin3	2.73731085831891	7.08118926074098e-06
Birc3	2.32706614671893	2.1858332263576e-05
Bivm	2.0995841004295	0.00764757892823375
Blcap	2.1494666994366	0.000896542800725319
Blzf1	2.24309247421641	0.00437452117286372
Bmp15	2.20544305833886	0.000772560494622623
Bmp2k	1.71144631541025	0.00994616904810087
Bmp5	1.39584809151311	0.0260863453285101
Bmpr1b	1.94431567025178	0.00111847447339729
Bmx	2.31596904996516	0.0185435770997972
Bnc2	2.24800772161035	0.000464872128494697
Bod1	2.27440220402968	5.60435107309962e-05
Bpgm	4.43180506843477	8.74629207745615e-14
Bphl	2.20692232811607	0.00222060533016571
Brca1	2.11499564674064	0.00365166668968475
Brcc3	2.6925174834319	0.00983083279989592
Brd7	1.7432882514541	0.00277727883281022
Brinp3	3.21274143441081	0.00342262349013852
Brk1	1.59403159563864	0.00517875780320335
Brox	1.29641769968445	0.0450244171143341
Bst2	2.64531015669059	0.012372485116393
Btbd2	1.58386879937344	0.00773913586479917
Btf3	1.28175677934882	0.00742619947907615
Btf3l4	2.03387511906597	0.000311015859435591
Btg4	3.04920850245227	2.84474719245683e-05
Btla	4.93769378301037	2.4203042126515e-06
Btn1a1	10.9119872028815	7.25848548025594e-14
C030013G03Rik	8.70751977443725	0.00217533910686622
C130060K24Rik	3.2931189374669	0.00367727808332289
C1qc	8.34318239871892	0.00363259169471694
C2cd3	1.27497003498914	0.0279291738439627
C3	3.02909956003786	0.0417686134745677
C330018D20Rik	2.41279883481718	0.000319313326888968
C77370	4.39960856728882	0.0165332834540282
C86187	1.96378860193093	0.000222661210579735
C86695	4.14180113007033	0.00723652692296309
C87414	2.79989959490274	5.96045628522075e-07
C87436	2.95352266866122	1.37817085136825e-07
C87499	4.01856765370345	2.164083123609e-08
C87977	2.66711916226924	5.20263713898656e-05
C8b	3.41629466349231	0.000372624895945939
Cacna2d3	3.66445100684016	0.000729924753436503
Cacng7	8.62415286689878	0.000210839844393742
Calb1	4.75195547624067	4.29973700751458e-08
Calcoco1	4.64333668016523	5.27384085234871e-09
Cald1	8.47884047084788	0.000472556633225511
Caln1	3.73112705598611	0.0309554739298497
Calr4	3.63266678952143	5.01444710656926e-06
Camk1d	1.40370893744565	0.0404698108808348
Camk1g	6.16710998705732	1.61156260870654e-05
Camk2g	1.5701682933372	0.0156856769748217
Camsap2	1.27622372235815	0.021740834400286
Capn2	5.00189628881463	0.033091899648594
Capn3	8.43172494948842	0.000209680105184816
Capn5	2.70806232623141	0.0217435933123198
Capn7	1.06025369068967	0.0384850476075098
Capns1	2.57936152894537	0.000839656307936409
Capzb	2.53673100580895	0.000295048989387598
Car10	6.47181512909993	1.00004743735188e-07
Car2	3.88676414773374	0.02222137967391
Car9	2.14218762962957	0.00771639804843726
Card10	4.61736111594145	3.38230077428861e-06
Casp8	8.55344372330855	6.16106440069713e-09
Cast	1.87918352286726	0.0378346800208817
Cbx1	2.0098261352684	0.00845830718076265
Ccdc104	2.22386175567752	0.0270730329101187
Ccdc11	2.64846357901827	0.00916674855957054
Ccdc122	2.26951150314892	0.00110225582482865
Ccdc132	3.90943644644315	2.02450008577299e-09
Ccdc14	2.83117539744232	1.29241078108403e-06
Ccdc15	3.93480059399005	0.00253820422410493
Ccdc158	2.2804795878986	0.00732721809527054
Ccdc171	4.06054493457122	3.02480027369677e-05
Ccdc174	1.78267609768583	0.0425956509923102
Ccdc181	3.65170233331344	1.69903358986572e-05
Ccdc23	5.91820754302029	0.000451780449256389
Ccdc3	5.52662635443007	6.38316136187275e-08
Ccdc30	3.32077534398254	0.0384317761542135
Ccdc34	2.59093363042843	1.03095400099583e-05
Ccdc40	2.03678209989709	0.00637483019893835
Ccdc42	4.42160572731976	1.19111565425026e-08
Ccdc47	2.28029438004084	3.73639536956127e-05
Ccdc53	3.85131986080616	0.00452436850572898
Ccdc6	1.3243917769496	0.0165332834540282
Ccdc62	4.0572524533553	3.03022014705835e-09
Ccdc69	2.48670688080089	3.1305965183725e-05
Ccdc73	2.68616711753064	0.00148864089434559
Ccdc82	1.45228594344242	0.0108554504989456
Ccdc84	2.29506676291763	0.0331978656859837
Ccdc88a	1.24072422956542	0.0449465945401526
Ccdc90b	2.81405279437264	4.74520530993342e-05
Ccnb2	1.48147409374785	0.0391750501469017
Ccnb3	2.76496757072929	0.000587751147293991
Ccndbp1	1.35810987151937	0.00984740064348805
Ccp110	1.13067079607332	0.0202517887581998
Cd164	1.11601135478589	0.0371177149011166
Cd164l2	2.81221521481463	3.44650213452725e-05
Cd1d1	3.86430954039408	0.00133780205182775
Cd200	5.88737156193063	4.05495939836326e-05
Cd300c	3.32462340461295	0.0143553513520255
Cd300lf	4.48790664402983	3.52521832895032e-06
Cd36	2.55358801753072	0.00115136946013919
Cd4	4.27791350463218	1.15089429616104e-06
Cd55	2.05394825540555	0.000518597503467659
Cd59a	3.31368451485299	3.77797579743975e-05
Cd68	3.92095954268414	0.00432734432747298
Cd96	3.75650207952754	0.0174947876137336
Cdc16	2.38656589725138	0.000412960706905836
Cdc25a	1.42732951517657	0.0385739975049815
Cdc25b	3.10577841810429	1.47009503057291e-06
Cdc42bpa	2.83725599192709	0.00181917625827589
Cdh1	1.42542232480932	0.02536511223537
Cdh20	4.36500884844881	0.0212397563724426
Cdipt	1.50624873837977	0.0292108416256809
Cdk14	3.92785570600049	0.0017584408785765
Cdk20	2.67587938102293	3.48864061765734e-05
Cdk2ap2	1.47813583064996	0.00837354285658554
Cdk5rap2	2.85974550947715	0.0139448891712191
Cdkal1	4.74750887522871	0.00038593295047206
Cdkn2aipnl	1.27531157847917	0.0378167202619446
Cdo1	3.80226511301611	2.52939709305353e-08
Cds1	2.17970114021529	0.00469361390050406
Cdyl	1.3293813177647	0.026471819985341
Ceacam10	2.97720624662931	0.0110657414198212
Ceacam20	2.34249225840902	0.00218547614194333
Cenph	1.48952489841056	0.0067893626100545
Cenpj	1.47393941633371	0.00864618698384424
Cenpn	1.65188557630496	0.0374493797967642
Cenpo	3.17967536116636	4.43189256881219e-07
Cenpv	1.27026536506489	0.0436889122535151
Cep120	1.84641691030168	0.000740817595101994
Cep128	1.99280854413393	0.0338352755305552
Cep135	1.52087641493491	0.0175880564927247
Cep164	1.91384615118888	0.046576519288563
Cep170	1.2083246966317	0.0481023148087887
Cep19	2.70864411256671	0.000773332955757654
Cep41	2.3600366328592	0.00771082557641913
Cep55	2.48909839114184	0.038809673700545
Cep70	1.15883059501213	0.028503722236448
Cep85	1.24001726044866	0.0357343272774999
Cerk	3.86409912151418	0.00246003165357831
Cers6	1.83289174086752	0.0442525421614567
Ces1d	7.59385438554	1.95544375769272e-05
Cetn3	1.19122495582388	0.0294898320735091
Cetn4	1.73250314951475	0.0473173771869595
Cfap221	4.2860668811182	0.0247241253850146
Cfap58	5.00035260736653	0.000372588342081235
Cfap97	2.67586960673822	6.48745729445055e-06
Chac2	5.37631659204912	0.000663579760167097
Chchd6	2.44796325387799	0.027696060791876
Chd1l	7.79623086100003	1.00955130927154e-06
Chd6	2.14985066243921	0.00293156990131486
Chdh	2.48379127269551	0.00667661420921224
Chek1	2.19219563333358	0.00887909865998647
Chfr	1.22355242645151	0.0377172236172498
Chil1	Inf	0.00362298046411351
Chmp2b	3.84330411350421	0.0469753724491454
Chmp3	2.99177216827403	1.81093708187731e-05
Chn1	2.27355398797068	0.000350479430981058
Chodl	3.9977826734149	0.00635968385244139
Chrnb1	3.56168885723635	0.000114609839718063
Chrng	3.65457814879981	0.04217911123308
Chsy1	1.43615281405194	0.0147005361778771
Cib3	3.06183410250018	0.0063441771125102
Cisd2	1.30246488774428	0.0219436747914072
Cisd3	3.51428691699767	0.0032772808665973
Cks1b	2.49151277448776	1.34530557183814e-05
Cks1brt	2.39954085349129	0.000613083219377588
Cks2	1.17467683360759	0.0225330179322366
Clasp1	1.8999398053806	0.00500490031166615
Clcc1	1.87583029306909	0.0407923599522746
Cldn10	8.98209418782552	0.00544640729021649
Cldn15	4.31556205114735	5.15638057136582e-09
Cldn25	1.7775700715228	0.00915287151376919
Cldn8	4.66576568609147	0.00798584739647841
Clec2f	7.36703402398239	2.48837368346514e-05
Clec7a	8.94131893129817	0.0459863817485207
Clip1	1.51728449197087	0.0124994113233863
Clk2	1.40991448004086	0.0205173263840167
Clpb	2.62285988624433	0.00185589585485107
Cltb	1.30893961516053	0.0289911149141874
Cmas	2.08471924378357	0.000402845995143365
Cmc2	1.6512865050218	0.0284570560370031
Cmpk2	1.30420390116226	0.0419497549402521
Cmtm8	2.73301211930502	0.000529063014696221
Cmya5	3.08783268842413	1.18605456891077e-06
Cndp1	2.62222656636523	6.31974785311651e-05
Cnot11	2.81091079275944	0.000325504653956425
Cnot2	1.38066433459331	0.0215812933570224
Cnot3	4.50720033093821	7.92503917654971e-05
Cnot4	1.62545559344463	0.00653859364856522
Cnot6l	1.22934303920706	0.0348591282865623
Cnot7	2.17294144854353	5.05975432876273e-05
Cnpy4	3.39670663521827	0.000666181149717643
Cntd1	5.39314627041056	0.00306647674660785
Cntn1	2.13506345513309	0.000335640501502487
Cntn4	1.57527994043946	0.00800394381993806
Cntn6	5.42842870905676	7.8447533767072e-16
Cntnap2	2.21678365831345	0.0216164510068128
Cntrl	2.02788558689372	0.00771082557641913
Cobl	2.12087757038586	0.0354879860646327
Cobll1	2.0133566257872	0.00179907366527453
Cog6	3.22019130774137	0.00331299457099757
Col23a1	4.3956469782257	0.024744889416294
Col24a1	3.91607288907778	4.41738770794566e-07
Col4a2	2.26919827750193	0.0489760124513947
Col4a3	Inf	7.63130996366556e-05
Col6a3	2.35872560703567	0.00227564522634112
Commd1	3.13260422609152	0.000774711962077116
Commd10	1.66973928901672	0.0206978250199847
Commd2	3.10202081817891	6.94134817023212e-08
Commd3	2.80362161858744	3.09052652242118e-06
Copa	1.71637538923853	0.00295598030673986
Copg1	1.47634845239483	0.0209987388766902
Copg2	2.20474273664894	0.000427047164475915
Coprs	2.70063815644324	0.00343209984645573
Cops2	1.37797217809988	0.0137253902379989
Cops8	2.22458175077071	0.000164217730261122
Copz1	1.59501355708854	0.00451455852506392
Copz2	2.92943755250559	0.00128417422488291
Coq10a	1.62589066641595	0.0179059410723731
Coro2a	2.76847469127147	0.00404007541083438
Cox10	1.48359599277432	0.00971800033104834
Cox6b2	1.26116268555979	0.0294898320735091
Cox6c	2.59949667312811	0.000396924334546903
Cox7a2l	1.60883373778459	0.024018388092992
Cpb2	3.22131996385147	9.68125354408574e-07
Cpne3	1.88529854682408	0.01101953765734
Cpne5	4.79016761704972	9.5738023129833e-09
Cpne9	3.32050946824012	7.63777441232308e-07
Cpox	1.83637134551651	0.0392349107582144
Cps1	2.25069036173435	0.0064862542454482
Cpsf2	1.82681062793289	0.00235579726336167
Cpsf4l	2.52234326839264	0.00120420656934049
Cpvl	10.6254232105994	1.82093215610704e-10
Cpxm2	3.14368544486241	0.0059609430585798
Cr1l	3.73909346082822	0.000169141442753336
Crb1	6.05732855520638	0.00242133115634379
Crbn	2.51441402893749	0.001659139350747
Creb3l1	4.07462628464375	0.00055537812177386
Creb3l4	3.22195879339471	1.19110962095045e-07
Crebbp	2.49258904458327	0.000397926651515274
Crhbp	4.1789772612801	0.0168751369641995
Crlf1	2.14315398726885	0.00725827644844368
Crym	5.03994169460214	6.09960963392392e-05
Cs	1.96745639718153	0.00103108209579338
Csf1	1.8400823347312	0.00669399324241007
Csf1r	8.94868808699167	0.0320266279415991
Csmd3	2.07063375638976	0.0149279829578795
Csnk2b	1.12690796888613	0.0481022087686677
Csrp1	4.70964770242098	0.0152223706378571
Csrp2bp	1.26896598075312	0.0370098027790019
Ctbp2	2.36020798456689	0.000201796435779858
Ctbs	1.79372552823052	0.0479600213804621
Cth	1.23626440894906	0.036120668861423
Ctla4	3.11381696279351	0.0492842370036374
Ctnna3	3.33840568939037	0.000303940420104761
Ctnnal1	3.16999039629629	9.55604703469193e-08
Ctps	1.170752403569	0.0292925787512637
Ctss	8.00720272187408	0.0327011158309826
Cul1	2.00134018137817	0.000331860120898243
Cux1	3.57253356437188	0.000327855686347511
Cxcl13	3.16991158305486	0.00406465255818623
Cxcl14	5.22050774284067	5.48189408226529e-09
Cxcl17	8.32960462453357	0.0122213066667913
Cxx1a	2.6321797162433	0.00604240299019063
Cxx1b	2.76738540916134	0.0225009877026092
Cyb561	3.0470553466357	0.00039683972584021
Cyb5r4	1.5887134047853	0.0042524636270965
Cyfip2	3.93950922295217	1.15552086196451e-07
Cyp19a1	9.1981745819741	2.26251434211046e-17
Cyp26a1	8.72921863729974	0.000594379074716599
Cyp2a4	6.21449707722653	0.00174669259695026
Cyp2b13	8.40481699931743	0.000328589640022293
Cyp2b23	3.95337139108979	0.00024298978644925
Cyp2f2	2.57757098771867	0.00874814618462529
Cyp2r1	2.73305866856378	0.0441267683112171
Cyp4a10	5.20615788478557	0.00127901592976275
Cyp4a14	4.08064603100415	0.00225859459534409
Cyp4v3	2.6565313847872	0.0153833003141017
Cyp7b1	2.81898221923016	0.0454087469736499
Cyth3	1.53567408453703	0.0300175235611562
D030018L15Rik	3.73789256530682	1.63135595776789e-05
D030040B21Rik	2.20699309739562	0.0110930764611309
D10Wsu102e	2.57304215104503	0.000169141442753336
D16Ertd519e	3.49899781712397	0.00335815640066937
D330045A20Rik	2.77071227192493	0.0446144128066418
D630045J12Rik	1.78840440430143	0.0150285168041402
D6Ertd474e	2.24834373600131	8.69072331204959e-05
D6Ertd527e	3.42160365779226	0.000844744214776196
D7Ertd443e	3.36128236703021	0.000135696276784919
Dab2	1.78865746718846	0.00143829268068484
Dad1	1.5574706412332	0.00821204822502279
Daf2	3.85367498290534	0.0181533580008079
Daglb	4.283940631986	2.62922502523036e-05
Dap	2.78878005357714	0.0400258241976811
Dapp1	3.38820926881903	0.0209371612797904
Daw1	3.59071110465234	2.24947272767929e-08
Dbi	2.63064015487362	2.50974254225341e-05
Dbndd1	2.23379820307821	0.00570477766843914
Dcaf5	2.33213836672629	0.000956727367494765
Dcaf7	1.27640802466382	0.025360965029813
Dcaf8	1.5720753845786	0.010854997119496
Dcdc2a	2.90036449329083	0.000270668542909701
Dclk2	2.17163992368184	0.00313947146003219
Dclre1a	3.19638552648669	3.39417010926542e-07
Dcn	9.74850626916106	7.20386319802588e-06
Dcp1a	3.51787274003805	9.197826678907e-07
Dcp2	2.17892767093853	0.00632930973480761
Dcps	2.47557539978063	0.00182666553569841
Dctn5	2.94496553150297	7.99613314366076e-06
Dctn6	4.01424278110179	0.000648398622096023
Dcun1d1	1.28067463647904	0.0161644294898016
Ddhd1	2.36510595268668	2.89381864717118e-05
Ddr1	1.95304290678314	0.00980181755180803
Ddx19a	2.88996997222057	0.000167527110956376
Ddx58	2.33778089826456	0.00257134789739931
Ddx59	1.65493851288126	0.0120929828392417
Def6	3.47155681894215	7.41054559816913e-05
Defb8	4.27262238607071	0.00690228822546504
Dennd1b	2.35646967206442	0.00593627481772193
Dennd6a	1.42042943869671	0.0134149963701357
Deptor	1.77555718433963	0.00282051422822299
Dfna5	6.15723894430761	6.42391355341243e-06
Dgcr6	4.18557002706767	9.07814841937991e-05
Dgkd	1.35493443722057	0.0357370308659071
Dgkh	3.50256149384183	0.00624321422964657
Dgkk	2.38441849961636	0.00466687272322523
Dguok	1.53544874927034	0.0330477664496598
Dhrs1	3.28174167123486	5.85552943513722e-08
Dicer1	1.56865624730255	0.00712693101560906
Dixdc1	5.03732423044925	0.00622687848417138
Dlat	3.471034808619	1.29528671805581e-07
Dlg2	4.45665853398572	1.81520426329172e-06
Dlgap4	2.07590049294289	0.0133052989939964
Dlst	1.94768342227164	0.0106984084499578
Dmpk	4.51143497963882	0.00446729045827516
Dnah10	1.81062924813901	0.0228584993360693
Dnah11	3.70219690108288	0.0337222441418972
Dnah5	2.59039524859446	0.0449730981247993
Dnah7a	2.42385107582725	0.00132337090405008
Dnah7b	1.94736241898092	0.00361643788505652
Dnah8	2.69401460196171	0.00523178402351609
Dnah9	1.88718481419854	0.020759573591351
Dnajb4	3.59872846225084	0.00283998410882034
Dnajc11	2.7378476513545	1.6363129424625e-05
Dnajc14	2.52736313136329	0.00361263894720185
Dnajc19	4.74397408212387	2.74193055814079e-05
Dnajc5b	4.00171084956376	6.12915120168662e-09
Dnajc5g	4.57417841593385	1.90652120118091e-05
Dnajc8	1.76312924362015	0.0028484311929783
Dnajc9	2.54776929690127	0.0182383939769282
Dnal1	4.28652095934885	0.000472556633225511
Dnm1l	2.85597006813278	5.42681078276066e-05
Dock3	1.95487718412387	0.00291958869697208
Dock7	1.11475831693113	0.0260509596967946
Dok4	2.26378800924579	0.0153647937513919
Dpcd	3.98030537490323	2.8225436473458e-05
Dpcr1	3.45513570891763	0.00253661735562644
Dph6	4.25824024217007	3.12096616465451e-06
Dpp6	2.98497167808602	0.0141385833138899
Dppa1	4.08381663778648	0.00249309323926395
Dppa3	1.32911313249277	0.0138635704045925
Dpy19l1	3.24164620322271	8.23720698925999e-06
Dpy19l3	2.75527205926005	0.0424433508110686
Dpy30	3.19372271412814	1.12675147559213e-08
Dpysl3	1.38395858642348	0.0318203307786591
Dram2	1.99744322892659	0.00544640729021649
Drap1	4.12822375046874	1.71905206932243e-05
Drc1	3.86425395579139	5.56924446795324e-08
Dscam	4.10381753862689	0.0011016547099281
Dtna	5.15420624618639	1.90683779143242e-08
Dtx3l	2.4913358513589	0.000330954815246578
Dusp13	Inf	4.92389816543345e-05
Dusp19	4.2714433382395	0.00651428988910524
Dut	1.42666307878573	0.0147698659901073
Dvl2	1.76397838727717	0.0145874346191042
Dym	1.3417161967205	0.0307339975968926
Dync1i1	3.65895564881412	7.7856192171215e-06
Dync1i2	2.65334442545369	1.87665109222708e-06
Dync2h1	2.59542228124287	0.00593130740287791
Dynlt1b	2.55471622467172	0.0172419007707088
E130008D07Rik	2.50717324721565	0.000591180130027897
E230016K23Rik	3.84388702723981	1.18525950020153e-05
E2f2	1.62054524021466	0.0185697950465101
E2f5	1.9083158166868	0.00050998512347719
E330017A01Rik	2.46567052563629	0.000666281528222162
E330021D16Rik	5.27261284647151	2.33639421125555e-05
E330033B04Rik	2.85504400877075	0.0218935653874675
E330034G19Rik	4.09464045792835	7.4986763887642e-09
Ebag9	1.89767548192309	0.0255607257479175
Ebpl	1.6570105575927	0.00565238990218007
Ech1	2.43370844214625	0.0413461726673434
Echs1	2.19818255431452	0.000463782324743104
Edc4	1.82539415416881	0.0398486443017931
Eddm3b	4.69136092585409	0.00252573563898904
Edrf1	2.27568905709686	0.0358771193955771
Eed	1.72049139944127	0.00508326773289534
Eef2k	2.60716578584257	0.00272689757941865
Eefsec	2.02112054800474	0.00871967922581182
Efcab11	2.15124307853747	0.0294253294118595
Efcab2	7.96204475027925	0.0265935512101409
Efcab6	1.99384676041826	0.010364138163568
Efhc2	3.63992224862985	9.14808122995519e-05
Efna4	3.46856233114903	0.0371954812529928
Eftud1	2.88675400408409	0.0022607627314679
Egfl6	5.43579277188072	0.00014709977315063
Egfr	2.15367992830053	0.000916689359277979
Ehd4	2.28534955690599	0.000282008771619639
Ehf	4.19096642075014	5.76391900582627e-11
Eif1b	1.62408245963326	0.00266248304359484
Eif2ak4	2.72823159526109	1.76786403695092e-06
Eif2b1	1.8874726012994	0.0143428998665167
Eif4a1	1.54519739433383	0.00895750650118501
Eif4e1b	3.33784765910004	0.0483267510455912
Eif4enif1	1.66710741641272	0.00283469857244576
Elk4	2.74674236496461	5.93952334269311e-05
Ell	1.96200852915433	0.00235059541840276
Elmod2	1.25937379419835	0.032207824916466
Elovl1	2.08838364925255	0.0202335700237788
Elovl7	2.55232986595707	0.00369748971454624
Elp3	4.60938457813922	7.27468353096327e-09
Emb	4.35541766994855	6.66394242965501e-09
Emc2	2.44334917811087	0.0230184030146171
Eml4	2.15904155644247	0.00110486835663587
Emp1	Inf	0.0256393074111936
Emp2	2.02713150301159	0.004560518314491
Emr1	9.48252868049912	0.0486370219827515
Enah	1.82777292366108	0.00128841393796002
Eno4	3.68523123882296	0.0391883389850626
Enox1	4.28730885570575	3.74984371017993e-11
Enox2	2.28428031471359	0.00436204089621087
Enpp2	2.3559183826202	0.0455022211226185
Ensa	2.56107606899196	0.0442660867277992
Entpd1	3.7034117195852	1.45072510199883e-05
Entpd5	1.78487393596153	0.00556502360026579
Entpd6	1.88807553573091	0.00422190575691576
Eny2	3.34612552115332	4.80108275225492e-08
Epb4.1	1.66947234559666	0.0107911583419521
Epb4.1l2	2.2736525470889	0.000122950709506664
Epb4.1l3	2.25985363009889	0.0184803188047005
Epb4.1l4a	1.99731190071926	0.00686537184465813
Epb4.1l4b	1.67534790525294	0.0048529021128206
Epb4.2	2.73151012980596	0.0351390375505679
Epha4	1.7606030787406	0.0105744155565408
Ephx4	1.76575808276655	0.015844371747168
Epn2	2.05300279309137	0.000233218625953646
Eps8	2.35565221654912	7.34018369228314e-05
Eps8l2	7.37714375928264	3.71856292163901e-06
Epsti1	3.46972190506121	0.00140698824478386
Eras	3.86702298090489	9.24215917886433e-07
Ergic1	3.2682726816642	2.08065865848699e-05
Erich5	4.61941487901857	1.00555912893746e-09
Ern1	3.25787672125556	8.46771071488567e-07
Ero1lb	1.74262506071102	0.00373979784308202
Erp44	2.04479494234245	0.00537529615849661
Esp4	5.25807724013632	0.0017469745183635
Esr2	3.3178270338869	0.00260939371831907
Ethe1	2.7514689246678	9.82372395527131e-06
Etl4	2.31257682329606	0.000131781884184898
Etohi1	2.3533945960609	0.0448831192422254
Ets2	3.0003655920507	1.03998162092504e-05
Etv1	2.42053356547194	0.00207350524661053
Exo5	3.08881264489134	0.000194061887486065
Exoc1	2.62361932946825	1.27287134706691e-05
Exoc6	4.59473171935513	3.49322729411233e-05
Ext1	2.09232863364891	0.00259692586371737
Ext2	3.85617596747718	0.0458100888176125
Eya1	1.6403887663398	0.00786096573717757
Ezh2	1.37254076372338	0.0124433195560501
F3	4.78386119231135	0.0265900244078687
F8a	3.06519672398512	9.18055770399697e-05
Fa2h	2.0258134305879	0.000773680765230175
Fabp5	3.86149810413635	1.66280897207179e-10
Fabp7	3.8934091973376	0.0339725014041862
Fam104a	1.42495844365046	0.00791279206017478
Fam110c	7.18056562601361	7.15758934274591e-12
Fam120b	1.83648050866855	0.0403668597498453
Fam122b	1.77855327737448	0.0129452419636673
Fam129a	5.17271970113187	4.4478897761243e-05
Fam134b	5.33000272371965	0.00241051721810325
Fam13c	2.67991459330536	0.00397521468401355
Fam149b	1.68187263803001	0.00477338193085628
Fam155a	3.10763453219133	0.00418167451735584
Fam160a1	3.2117422077017	7.99538168992027e-08
Fam175a	1.75462913651055	0.0418412027894952
Fam185a	1.80454598082287	0.0117098618477638
Fam187b	3.40224566042075	0.00277727883281022
Fam189a2	2.99521667269867	0.0183495578679885
Fam192a	1.65032048107679	0.00482592920440929
Fam193a	1.49340924402584	0.0441267683112171
Fam213a	3.64128633482414	3.24617708921301e-08
Fam217a	2.298394422173	0.00608502157759632
Fam222b	1.4322535471863	0.0106629121643866
Fam229b	4.75478908084694	0.00340560918884545
Fam35a	2.18743673910731	0.0073036715577514
Fam3a	1.82472325366084	0.0424646981119658
Fam46b	3.12524566320137	8.06408308095122e-06
Fam46c	3.11379275000303	2.48837368346514e-05
Fam53b	3.46345356350178	0.00837374708031485
Fam60a	1.77105222429762	0.0101257509796378
Fam71d	9.10499561477951	6.31186144889463e-06
Fam92a	3.44218988536303	1.5721898216997e-05
Fam96b	2.72069851355267	3.88216793911447e-06
Fancc	2.23691651567121	0.00039333606196607
Fanci	2.01329519794276	0.0200290092220776
Farsb	1.99190741085796	0.000248366921430027
Fastkd1	2.49445162507584	0.000385062253091929
Fbn2	3.85144077219583	0.0159386233566548
Fbp1	5.77487497748497	4.08248507405516e-11
Fbxl17	2.2827869076537	0.000113315640055337
Fbxl19	3.21911806595004	0.0114611984333651
Fbxl2	2.25086800003902	0.0235744150165438
Fbxl20	1.64634438184894	0.0154029485074677
Fbxo18	2.09160014796591	0.00207102637736706
Fbxo25	2.29628771119299	0.00606977044133438
Fbxo3	3.44143570588279	3.39735233289931e-05
Fbxo43	2.87745564614809	1.93660921677704e-06
Fbxo9	2.73610693468561	6.22085315443309e-06
Fbxw14	2.77678897883209	0.0265900244078687
Fbxw15	3.00597821583367	0.00136332035382615
Fbxw16	2.44721334556025	0.0108293840880873
Fbxw18	3.09386599383367	0.000302544281945654
Fbxw19	2.49238741726373	0.0223041996680482
Fbxw20	3.89701297657567	5.60435107309962e-05
Fbxw21	1.54057666424453	0.017813301320884
Fbxw22	3.69395074762758	0.000438744133299705
Fbxw24	2.72921275820747	0.00866658855251952
Fbxw26	3.20623146650595	1.30411643227856e-06
Fbxw28	2.76040182909787	0.0279631590952147
Fbxw4	2.68981370876381	0.00143963766670824
Fdx1	3.56493132730484	4.54625937931285e-05
Fert2	1.7673906623593	0.00701390747985299
Fetub	4.16189825165541	9.2932107488151e-05
Fgd6	2.60643053541739	6.08462556745511e-06
Fgf9	2.03767326838817	0.0228099945157125
Fgfr2	2.26294888373935	0.00563523192704667
Fgl1	10.1767163829184	6.86275276308186e-08
Fhit	4.08277043167981	0.00745659499242648
Fhod3	1.66102368630775	0.00730979126106768
Fip1l1	2.21186467576141	0.00263687031501321
Fkbp5	1.6890928155063	0.00439977128641455
Fkbp8	2.03650888834262	0.0227806317681888
Fkbp9	5.60199459539651	9.93215715096823e-07
Flad1	1.58187094958415	0.0446756623334865
Flcn	1.47515983944222	0.0196369835519255
Flnb	1.78712064592817	0.0297717906977041
Fmn1	2.59647675086628	0.00487220823934001
Fmn2	1.64711253213104	0.0111188166981459
Fmnl3	1.44982582687335	0.0134149963701357
Fndc3a	2.56509331193507	1.36328325354272e-05
Fndc5	6.28816031895669	0.000809873747810529
Fnta	2.50600022402299	4.68663000782032e-05
Focad	1.56998031394955	0.0448828389640892
Folr4	2.75414372898933	0.000117677056632522
Foxn3	2.65624769745337	0.026436547801795
Foxo3	4.00642266584049	6.75313592122022e-05
Frk	1.81349587100305	0.0124994113233863
Frmd3	2.90654009879723	0.0357896175662073
Frmd5	4.37128885901266	0.00530060884475811
Frmpd4	Inf	5.7609409500017e-08
Fry	1.91168783651027	0.00841209871489802
Fsd1l	2.7173411763391	0.0456029068503127
Fsd2	4.22199962547935	8.28937552018964e-07
Fstl5	2.45734213288882	0.0111366627756387
Fut10	4.362193161524	1.07812050231842e-07
Fut8	1.82915512080207	0.00805758440999361
Fxyd3	8.2712680239667	0.00279320851694636
Fxyd4	3.68161541278928	0.00345794751954588
Fxyd6	1.45842519080286	0.0323092236602616
G6pdx	2.94386884055969	1.65342492021319e-07
Gab1	6.65165612319645	3.28632232277441e-14
Gab2	3.58285528659796	8.65103296653383e-05
Gabra3	2.28589916601467	0.00129154814310298
Galm	1.86433651468054	0.00350929870380987
Galnt6	5.31099157953794	5.4257800767648e-11
Ganab	1.36231247573956	0.0386336689218066
Ganc	2.95467837579946	0.00677004858917435
Gata3	4.6652745698826	0.000410507800067994
Gatad2b	2.09219379944703	0.00586454483293647
Gbas	2.16604574404805	0.00024298978644925
Gbe1	2.37358301715705	0.00825487393370198
Gbf1	1.99118002976064	0.0411316889255425
Gcc2	2.84679719637096	1.0671731724194e-05
Gch1	2.16269089841478	0.000171888313673016
Gckr	2.02657306898508	0.00479541094657306
Gcnt4	2.85238977100963	7.00403463468842e-05
Gda	1.0383768751421	0.0493597035199123
Gdf9	3.04663871086074	5.22841278451519e-05
Gdi1	2.51180679662911	0.000208932602159638
Gdpd1	1.78259006892188	0.0102726642840198
Gfm2	2.03825151546276	0.00757918440305033
Gfra4	2.27271942004011	0.0015571117073133
Gga2	1.98224176593131	0.00307254727017913
Ggct	2.70223823541121	2.55724070099219e-06
Gimap5	2.49448521196426	0.00848671967630868
Gja4	2.20395632387959	0.0277914854760844
Gjc1	4.66676346345427	0.000144457356531194
Gkap1	2.2597625533529	0.00020840182424374
Gldn	Inf	7.35846521303101e-05
Gle1	1.2129373060732	0.0318203307786591
Glis3	3.49920176514889	0.000222076581414712
Glmn	3.15470492902197	0.00305584705626291
Glo1	2.47365315739298	0.00722728562793908
Glrx	4.70895769783726	1.88100767086981e-11
Gm10516	4.50841962161448	0.00895750650118501
Gm10825	2.6003293517827	0.000664368329327539
Gm11545	1.83082877955848	0.0159774171348378
Gm11985	7.55170456260266	4.46864557831889e-10
Gm12070	1.24009375481293	0.0424411114489802
Gm12130	1.58492488759063	0.0077073376655749
Gm12942	1.61120054110946	0.00762804612995197
Gm13023	1.70993591316058	0.0229603748199222
Gm13083	1.85530427033504	0.00833944551732055
Gm13084	2.60784129881336	0.00770561160959216
Gm13125	2.39859849985089	0.00262049124473051
Gm13247	1.18398430801788	0.0435112146791768
Gm13752	2.0324203157149	0.00239867138051616
Gm14164	2.14209115575499	0.00933428862610203
Gm14403	2.57638991177083	0.022838308949695
Gm14436	3.02422820391756	0.000126174822553781
Gm14446	3.05497254191909	0.00617508760534188
Gm14635	3.71099108437552	1.64184700128304e-05
Gm14812	4.51392418373973	0.0140460051733988
Gm1564	1.36068029751323	0.0414680090794553
Gm1587	3.84175314560567	2.50924103116134e-07
Gm15915	2.67963935791347	0.00231659805494954
Gm16386	2.62007566005107	0.0427981965162075
Gm16497	3.29951929305735	0.00134649194491062
Gm17644	4.21668145287514	0.00994616904810087
Gm17751	2.02006870391496	0.00154391821957056
Gm17830	4.25559910843759	3.59469372469929e-05
Gm19461	1.99818059846265	0.0479689961225655
Gm1965	1.47376623013538	0.00946182002010871
Gm20187	3.13763109838432	0.00142049314526546
Gm20257	Inf	2.39249387683286e-06
Gm2042	1.20938497505899	0.0330948328811533
Gm20759	3.23806965250459	0.00427216963902159
Gm20939	2.23713327886905	0.0135780230711948
Gm2382	3.66310343738538	4.48261737795876e-09
Gm3143	1.58383546530998	0.00967680212940688
Gm3259	2.07575005791561	0.000295050290652512
Gm4371	2.07989573040549	0.02664455499645
Gm4566	5.13800729083927	5.42681078276066e-05
Gm4745	2.6173580912362	0.00508045964354735
Gm4926	2.84927804287696	0.0114001430025791
Gm4981	4.62582375887464	2.25970275654697e-05
Gm5065	4.83571041452618	6.19549892717722e-08
Gm5082	3.2420974005015	0.0369083046128896
Gm527	2.45756918552177	0.000811359849147926
Gm5434	2.29683391790255	0.00126938418697961
Gm561	3.8349839662982	1.72314124124565e-09
Gm5643	2.23509028614839	0.00292589669031403
Gm5833	8.91931652619469	4.03023618048607e-05
Gm6150	5.30689554260264	5.12888811205067e-07
Gm6367	2.61956860636026	1.47031083377754e-05
Gm6578	3.59847002281678	7.94968363876773e-05
Gm7694	1.73383819737238	0.0271878300045683
Gm813	4.12022246518039	0.000122950709506664
Gm8801	2.46124037122748	1.1614027059346e-05
Gmds	2.34126567627399	0.00224759657862633
Gna14	3.25214922025177	6.66475687335507e-06
Gnai3	1.63557406408825	0.00227912456991857
Gnas	2.93226961924146	6.57179737917942e-06
Gnb4	1.93187086610324	0.00453191803770496
Gng3	3.52256931903641	8.67615090845546e-09
Gng5	2.35063616548799	0.00119979096245376
Gnpda2	2.79194394746734	0.0223519258625026
Gnrh1	4.31045585341435	0.000301148295030966
Golga4	2.16502902875728	0.000165091494042555
Golga5	1.61044958902569	0.00416385040961442
Golm1	2.94385148756912	6.5952728136118e-06
Golph3l	2.40574256089678	0.00506446806072999
Gosr2	2.31626363917546	0.000158655362057833
Got2	1.95175692562254	0.00335320960954844
Gpa33	2.49595785573056	0.000231004531557774
Gphn	2.08117629857341	0.00133924985232639
Gpm6a	2.44815571282916	0.00310589732883805
Gpnmb	3.3159007003321	1.29987945147446e-06
Gpr1	5.25825335309053	0.000146930220409769
Gpr125	2.29828901455307	0.000396924334546903
Gpr126	4.53301649292686	0.0353572503698252
Gpr137	3.26548633615049	0.0193561106764894
Gpr149	2.75696517272285	0.0474258511301788
Gpr35	2.03486133017381	0.00479767062135576
Gpr56	4.25800416121966	4.85020471053383e-05
Gpr63	5.98733978686461	0.000106098245727195
Gpr64	3.88848278855288	0.00669716708302432
Gpr84	8.64515190153601	2.12007864558484e-15
Gpx6	2.57525316686051	0.00112157675740206
Gramd1c	3.98421768072578	5.73490674582262e-07
Greb1	1.62804354114585	0.0318933151700192
Grhl1	2.50083574178957	0.000189982701281144
Gria4	4.00773762853025	3.52664170155537e-05
Grin3a	4.03566643490869	0.0481071583569895
Grina	2.07158920744667	0.0021728520449874
Grip1	2.18236813847834	0.0229328905608984
Grm2	1.71878233294814	0.045295325006916
Grm4	3.81167457877864	0.00061662504052563
Gsdmc4	1.71442214150716	0.0105387420384499
Gse1	2.12401830915873	0.00337947119756345
Gsn	6.09026097614143	0.00438077333161146
Gspt2	2.75555841796476	0.00907399059605589
Gstm1	4.64616807444871	0.0066424422383265
Gstm2	6.39078032027953	0.000486117430893593
Gstm5	2.37474737583102	0.000134916525110068
Gstm6	Inf	4.48001508638236e-06
Gstm7	4.56037149567156	0.0424961895680112
Gsto2	5.46621518280145	4.19750500312156e-10
Gstp1	4.17552381169972	5.92591272430654e-06
Gstp2	4.14998850913563	1.06042001988606e-05
Gtf2a2	1.40010620513932	0.0346078420440156
Gtf2b	2.5954771141025	0.0010257530220554
Gtf2ird1	3.71619177566489	2.11558148367397e-09
Guca2b	Inf	0.00514362206335404
Gucy2c	4.03472251382091	2.76053775469452e-06
Gyg	2.76581190462525	0.0128734519354779
Gzf1	1.55405755623171	0.0180426312048087
H13	1.59254167335837	0.0375472993954821
H1f0	1.28992316774816	0.0418288600982808
H1foo	5.01234606145958	0.000931809066256989
H2+AC0-Aa	5.85362577080251	0.0136688865269354
H2+AC0-Eb1	6.82108346483018	4.39701732264128e-10
H2+AC0-T10	1.58093437854257	0.024447545850883
H3f3b	1.77992265586	0.000946907751248082
H60c	2.18343389112859	0.00259393393108258
Hace1	1.80655243300234	0.0335898913968664
Hadh	3.42092448753334	0.0170630407863672
Haus5	2.95101607928112	0.000434982904562103
Hbs1l	2.11147972967755	0.000917096696278524
Hcfc2	1.98092299785696	0.00826626256712077
Hdac8	3.31603014283878	0.0471152610906747
Hddc2	2.8986433405913	0.0114764621926172
Hdlbp	1.6576765412736	0.00315642570094857
Helq	2.91382520325998	2.65823826611889e-07
Heph	Inf	1.52603434840896e-05
Hephl1	4.50689980110265	7.7738973069883e-05
Herc3	2.59407843637598	0.0103830466353383
Hgf	8.06257633568492	0.0228660937308739
Hibadh	1.91484400839529	0.00989945197426865
Hif1a	1.55029422956241	0.0202254588942247
Hif3a	1.63163368572272	0.0129891528234764
Higd2a	1.8121059281763	0.00300530172100803
Hirip3	2.778112488973	0.00011432646913185
Hist1h1a	5.43611262863144	0.046985271362237
Hivep1	2.23086835481035	0.0166792384099932
Hivep2	3.2617706050808	0.0488768977322824
Hltf	2.03433105243996	0.0402279925477298
Hmces	2.27937848683109	0.000570101926526288
Hmg20a	2.69907428402991	2.54946229209427e-05
Hmgn1	1.24703488271594	0.0277070795519053
Hn1l	1.94650979278098	0.000839234286578509
Hnf1b	4.20336390537401	0.0255695018789716
Hnmt	2.18102706932147	0.00476168282009547
Hnrnpul2	1.13220077376215	0.0348437514252225
Homer2	2.1332672687422	0.000370185878101777
Hook2	1.99924763198304	0.0119231115170113
Hoxa1	4.08132683002427	0.0489693594547552
Hoxa7	3.36496184443818	0.00306374589194734
Hrsp12	2.96676737927797	0.0121712457504405
Hsbp1	2.21465211502077	4.455962552444e-05
Hsd11b1	6.43247828624279	0.00392508221401192
Hsd17b12	1.79439875693813	0.00266035245657051
Hsd17b13	1.09856293004995	0.0488124163502076
Hsd17b4	3.08720624075526	7.8711663480862e-05
Hsd3b7	1.72126945341033	0.00938895388045142
Hsdl2	2.10034246330701	0.000495917299734517
Hsf2bp	2.80317012643266	8.83844560039064e-07
Hsf5	2.43415896864676	0.000664368329327539
Hspa12a	2.79111251398408	4.95342681711059e-05
Hspa4l	2.08663171393764	0.000873785942831655
Hspb1	2.78594027486875	0.0434970366096415
Hspd1	1.13609082389934	0.0442189418899689
Hspe1	2.58143942866204	6.11524310383932e-06
Htr5a	4.22008111539907	7.57781829631007e-09
Htt	1.65102864251678	0.0403668597498453
Hus1	1.96837953536637	0.00273413521991207
Hvcn1	2.34245857946987	0.000448670304658518
Hyal5	4.42964987062471	0.0178550094813904
Hydin	5.45178719004319	0.00383163904300043
Hypk	1.83084749160128	0.00135392838033888
Ibtk	1.79358852937262	0.0024181129569027
Ica1	3.23408767181903	1.67124335898588e-07
Ick	3.06877664954984	0.000891575425125123
Ide	2.98919362690098	0.00459897413523516
Ifi27	3.54688812544089	0.0488768977322824
Ifitm1	2.39622587444251	0.0492050907795202
Ifitm3	3.32004520605328	6.87712774662928e-06
Ifitm6	1.58161248214413	0.00878256952767322
Ift43	4.37385124968717	1.06237900188954e-09
Ift81	3.3956218757524	0.000536186953480939
Igbp1	4.78423679734855	0.000650936560298362
Igf1	9.27282576616372	0.00170520544153346
Igfbp7	2.98870783082537	0.00303671845678882
Igsf11	2.90284664216368	0.000340841402365799
Igsf23	4.64882321222395	7.45351001723356e-08
Igsf3	1.76827953178047	0.0229328905608984
Ikbkb	4.68194054623775	1.09318663733369e-05
Ikzf2	3.15800487518291	0.023656105228399
Ikzf4	3.22053419013658	0.00139841203110747
Il10rb	5.26723223756628	3.47235163148213e-08
Il12rb2	9.78062960755722	0.000276456804476845
Il18r1	4.10161459334967	0.0215398053151385
Il1b	8.25225259139416	0.0137473368490092
Il23a	8.41420512948371	5.08244504177624e-06
Il2ra	2.78436711954746	0.0240073165694315
Il31ra	3.59799758224124	0.0234724401030987
Il34	3.19841746112716	0.00272622812875097
Il6st	2.14563358247505	0.0148698626697882
Il7	2.25654629437684	6.71254314651251e-05
Immp1l	2.87590969789111	2.08465589677692e-06
Inadl	2.5743529316102	0.000366495086299554
Inca1	3.07259698696848	0.00495177624906803
Ino80d	1.38347464234453	0.0159585480475538
Insr	2.89069954277067	0.0432093631498729
Ipcef1	2.04673366722524	0.0129348012236235
Ipo8	2.20577278131366	0.000134767161699206
Ipp	3.98795041822515	1.43823900542289e-09
Iqcb1	4.55599623751268	0.000662523538713898
Iqck	2.88814092075881	0.0284903112748016
Iqgap2	1.55316834650454	0.0120828142559743
Iqgap3	2.72050124456283	2.56901888033185e-05
Iqsec2	2.98944269823693	0.000143213064710094
Isl2	3.13425165578005	0.000521278224378989
Isy1	1.33388237798349	0.0424961895680112
Itfg1	1.47996679612203	0.0325663205599304
Itga6	1.82233539080527	0.00679103433414853
Itga9	3.17315396436899	5.45417517201045e-08
Itgb2	6.25060207107964	0.00432319592291064
Itgb3	2.2717906714835	0.0007667582868123
Itgbl1	6.86948690323786	0.0436889122535151
Itm2b	3.55840992029036	5.03918834882344e-05
Itpk1	1.57877274461843	0.0414427937004181
Itpr2	3.69386412132202	2.76890490763826e-06
Itprip	5.80620913035449	9.6510589795901e-05
Itsn2	3.97455110476677	0.00013700430969505
Jade2	2.214415407912	0.000349688678767975
Jag1	2.23919636716249	0.00118830080256821
Jagn1	1.47415313576322	0.00750573260882483
Jak1	2.65204872696	5.98779903143679e-06
Jtb	1.93675896649301	0.00925364728184823
Kank1	1.98626013812881	0.00421767898814731
Katnal1	2.97598007435185	9.50360714222077e-05
Kbtbd4	1.64252702058503	0.0118040538310147
Kcmf1	1.13719327954195	0.027709967562896
Kcne3	5.51350384410434	0.00619239754876291
Kcnh1	1.48131208675127	0.0237355302074421
Kcnk1	6.44712627063818	1.41334483285078e-08
Kcnq1	1.95891876291783	0.0388916888225267
Kctd17	2.28164071491106	0.0208504641697661
Kctd3	1.77581742836875	0.00121447309518482
Kdelc1	3.87102207370328	4.43602627660763e-05
Kdelr1	1.42238459347744	0.0357196366996476
Kdelr2	2.33955030360709	0.000169873247373875
Kera	4.6900608087187	0.018954228937586
Khdc1b	1.64839404788848	0.00228551964900598
Kif17	2.09967917052946	0.00087419861489367
Kif21a	3.28795375599999	0.0111974242536653
Kif4	1.25128307834981	0.0497441865411971
Kif5c	1.85019336718284	0.000935481740503137
Kif9	2.02134079636587	0.0426865551402717
Kifap3	2.53849224698029	0.0206869794862465
Kiz	2.06766885324612	0.0193008362837759
Klhdc1	4.1588553296823	2.82190110904133e-06
Klhdc2	1.37655947044494	0.00836663854523442
Klhdc3	2.27851348240289	0.00224599741000868
Klhl1	4.58220688690295	0.000146980795719505
Klhl13	1.63862883686496	0.0269887431237239
Klhl14	4.30221904579863	0.00571841806868604
Klhl32	5.1743898650527	0.0062999612251941
Knstrn	1.97124547468797	0.00845194645967961
Kpna7	4.80877893449438	1.96558409320031e-07
Krit1	1.7211947826712	0.0420297050786521
Ksr2	6.26412153024773	0.00247806193471
Kxd1	1.59350756035867	0.0130275983076543
Kynu	3.02206887243764	0.0195150614921489
L3mbtl4	3.13205625271876	0.00485055393034269
LOC101243624	1.84808742407969	0.00229900393435644
Lactb	2.12063399458747	0.000529288763731906
Lama1	5.53528262583255	0.0402259459672975
Lama2	2.36882551521282	0.012143614220238
Lama3	3.86298957618504	0.00464599167986863
Lama4	3.60310984785346	4.45793228678867e-05
Lamb1	3.64867559253575	3.23532540058328e-08
Lamc1	2.15402909723907	0.0179739405063433
Lamc2	3.20011087171658	3.08905979145731e-05
Lamtor2	2.69938059812964	0.000234558690105734
Lamtor3	3.88099627905706	4.50392296390963e-11
Lamtor4	1.96768188035909	0.048582823617095
Lancl1	1.51547500271851	0.0307511730533201
Lancl2	3.19679810992533	0.000430539423661222
Laptm4b	1.23078825039159	0.0310941108705457
Laptm5	3.52261203191018	0.0157479471605434
Lars2	2.94886416333684	2.08465589677692e-06
Lats2	3.82927916478909	0.0493261743275124
Lcn2	8.25775729381147	0.00131279170642801
Lcp1	4.48767262053163	6.87733169743995e-05
Lcp2	3.05704843081007	0.0350865873085394
Lct	5.9851494999745	2.33004772790674e-06
Ldb2	5.18921836393137	0.0244552170238103
Ldhb	2.73133604545169	1.10848120352936e-06
Ldhd	3.49161932166783	0.010168598575066
Ldlrad3	2.75730451727283	0.00569813132154994
Leprot	2.39891258373923	0.0159386233566548
Lgals9	3.61494397430345	0.0164635440491703
Lgalsl	3.03212874368502	0.000169487210091483
Lgsn	4.14504892404052	0.000315455096979813
Lhpp	2.83582080657383	6.92746310492821e-06
Lhx8	1.49189968500535	0.0169124625039632
Lig3	2.0821488413793	0.0267211785494366
Lilrb4	2.9242484197785	0.0335898913968664
Limk2	1.58006620393575	0.0126406915798128
Lin28b	1.49238283173965	0.0480155805685102
Lingo2	2.36476502786016	0.00183195748802086
Lipt1	4.43158220242993	3.33276756383366e-08
Lman1	2.66937861292867	0.00044888885249888
Lmbrd1	2.34600376194711	0.0273604075266289
Lmln	3.41300515375638	0.00948560461062231
Lmo3	5.05469788177964	3.52690685965227e-10
Lmo7	2.90740779278036	0.00414714702231429
Lnx1	3.62576078702155	0.0275588540671916
Lpar1	4.21594544371809	0.0318933086387743
Lpcat2	2.74752788790188	0.000167527110956376
Lpin2	2.25267768778791	0.000129817607470665
Lpp	2.73260539937937	0.000597340884533851
Lrch1	1.95660720247261	0.00319369188472828
Lrig1	2.75333784848879	0.000135668021900106
Lrp2bp	3.82041512488025	7.63130996366556e-05
Lrp5	3.51973352558396	0.00428795764399975
Lrp6	1.64007099612874	0.00487620061042815
Lrpprc	2.11999178100409	0.00209633227726528
Lrrc1	2.39812255785869	0.0168838888090889
Lrrc17	3.27224609408327	1.48787752406221e-06
Lrrc40	1.31214970207002	0.0252348823662838
Lrrc49	5.97468039538644	3.55756741864708e-15
Lrrc8b	2.4628847922222	0.0470274208187823
Lrrcc1	3.19586245326774	0.000144340678192864
Lrrfip2	1.69848884376977	0.00797874623694447
Lsm3	1.92739555724988	0.0346445925708538
Lsp1	1.59004209814783	0.00760591900759999
Ltf	9.40527432386519	1.19053712519814e-05
Lurap1	5.20626530546734	2.46414304495993e-06
Lurap1l	3.6083003330317	4.72253672422247e-09
Ly6a	3.19384570791678	0.0274867731499385
Lyn	2.19900772890011	0.00144105919430168
Lypd3	2.89699623402543	0.000266383424050037
Lyplal1	4.04620433050119	1.33278142567084e-07
Lyrm4	2.29428508168849	0.000196121574277334
Lyst	4.29501850317334	0.000650912763705494
Lyz1	6.73035499068888	0.0381046764290516
Lztfl1	1.83556373718195	0.00750573260882483
Macrod2	1.36010197657462	0.0242010823383972
Mad2l1	1.65745665097555	0.00107480664058899
Madd	1.7404163002625	0.0347364117997977
Maea	1.82733159170771	0.00249829464922466
Magea10	2.97074232297988	1.59038242508893e-05
Magoh	1.01682967712646	0.0439303168723974
Magohb	3.26559957643297	0.000674940994730057
Man1c1	1.79389026231165	0.0410069980705069
Manba	3.94550014715356	0.000115471164062806
Map2	2.91397281849851	0.000259199773196613
Map2k1	2.13663143342519	0.00101440993542192
Map2k4	1.78286638110686	0.000900559579636482
Map2k6	7.3892123200342	1.42421650223331e-05
Map3k6	2.44327569585425	0.00101902361586062
Map4	1.39352421434741	0.0172172532653111
Map9	2.94574831095508	0.00409964336564177
Mapk3	1.67919476793486	0.0133782841172274
Mapk8	1.51059875860674	0.00459384044783408
Mapre1	1.46307908947432	0.00904078955814675
Mapre2	3.75684425026804	2.24797563722274e-10
Marc2	3.35423646373546	2.34720578050996e-09
March10	4.83190664299971	0.00068711768940067
March5	1.28134790148648	0.0167835594534151
March8	1.78484811816135	0.0105024679043951
Mast4	1.70700208946131	0.00996051743117924
Mastl	2.05657781662092	0.000423559059044042
Mavs	1.65383583827483	0.0215676916547125
Max	1.50173651078934	0.0416295573463646
Mbd3l2	1.21853810520595	0.017889317849106
Mbl2	3.13868516647667	1.9099496533644e-05
Mbnl2	5.41308361117082	0.0175915789469798
Mbp	3.54370266084457	0.00102379220364658
Mcf2l	4.23016021408471	0.000757697365223276
Mcoln1	2.54658346993428	0.000546002999673327
Mctp2	2.77561316479055	0.00447430193063293
Mcu	3.66972043698861	1.95680043927169e-05
Mcur1	2.48506276874072	3.39413000034885e-05
Mdh1	4.27839136455617	0.00131344364175245
Mdm4	1.20548698810435	0.0216297336656378
Me1	1.9273647839354	0.000515478831225155
Mea1	2.10115234142797	0.00715270279165075
Med10	1.51119912825894	0.00835785441018841
Med12l	3.20193188432306	0.00500490031166615
Med15	2.14775870645674	0.000297841319406938
Med22	4.06402781477525	1.74875294620649e-06
Med27	1.4047245120449	0.0111444373719696
Med28	1.47487812819795	0.00637483019893835
Med30	2.95245311466734	0.037939083205189
Mest	2.43406814935707	0.00822463883835539
Mettl20	3.74265408413261	1.55858782017609e-06
Mettl3	2.1684976932934	0.00769746370070823
Mettl7a2Higd1c	3.51848141354876	0.00831043357688741
Mettl7a3	2.2300107872797	0.0455112783926605
Mfap2	1.99172320020936	0.0305800611403415
Mfap3	1.68949758476228	0.0134756600556701
Mfn1	1.97484734616229	0.000594379074716599
Mfsd4	2.27497673604151	0.00963044820706957
Mfsd6	1.63658109285991	0.0159774171348378
Mfsd9	1.8157436332098	0.0433461803980018
Mgrn1	1.54309121019222	0.0103830466353383
Mid1	2.43114186475305	0.031218601549985
Miox	2.96064136085486	7.99833449967162e-07
Mipep	2.71808036712457	0.0013436860086778
Mira	1.99088025868052	0.00158382547501671
Mitd1	3.80654046233	7.33018619147398e-05
Mkl2	1.87124896631257	0.0216659182929183
Mkln1	5.18285963135462	8.74110368555193e-16
Mlf2	1.2283035649615	0.0240502782711572
Mlip	3.28134457314842	0.000824489908362576
Mlkl	8.86376228380823	0.0275887989103909
Mlx	2.83519654502912	0.00635571411158946
Mmab	2.28296554052791	0.00661590465365924
Mmadhc	3.08951945666684	1.58346248979067e-06
Mnd1	5.85618874453598	0.0439806003450276
Mocs2	3.86735726142474	3.34280688423607e-06
Mon2	1.3227590683736	0.0244420568200552
Morn4	2.30968665300226	0.00246142980820326
Morn5	4.78737910895665	0.0104419950314772
Mospd2	2.50205066062817	3.0803183250885e-05
Mphosph6	3.33431876172616	3.8513627217969e-05
Mpi	2.99276537012839	0.016031976531074
Mpp6	2.32455194591373	0.000697098104506342
Mpped1	3.16638590369094	4.10834563294156e-07
Mrc1	3.87074247811995	0.0010059500348872
Mro	3.43881353303433	0.000113167135227551
Mrpl3	1.52438785939136	0.00882972711793843
Mrpl48	3.62659028235446	8.8523919051857e-10
Mrps21	1.63528770001811	0.0136417877886148
Mrps23	1.2443625638854	0.0351981176183955
Mrps25	2.58830772843873	0.000133099200327648
Mrps33	2.20825286311483	0.000112513682571926
Mrps9	1.85470021322622	0.0387910752869603
Ms4a6d	6.88118960152859	0.000132516207634364
Ms4a8a	Inf	0.000667009884886253
Msantd3	3.15411337686757	0.000139896620750215
Msantd4	1.20963739212722	0.0423388724025793
Msh2	2.05013601768939	0.0235865360519054
Msh3	2.54887750073569	0.0020839387677895
Msh4	1.71609188945111	0.0410048335830457
Msl3	1.0602322397206	0.028957442411595
Msl3l2	2.81548574480301	0.0065810322205036
Msr1	8.60026890123839	6.31566940853017e-07
Msrb3	3.41372948183042	1.35560823921927e-06
Mt4	2.4712422711107	0.000439250380355505
Mtap	4.01997653658465	1.15097188064082e-10
Mtbp	4.80784369736442	3.62859326418298e-06
Mtcp1	3.7501792907286	7.00435167387936e-06
Mtfr2	2.82912370517883	0.0371773773828765
Mthfd2	1.52865896825949	0.00841259402454515
Mthfs	3.54116464544491	9.78038770839151e-09
Mtmr10	2.59262027629382	0.0274875159393672
Mtmr11	1.972088806509	0.0106207961474858
Mtmr7	2.45351712387183	0.00738044040293052
Mto1	1.8921190457657	0.0102631887309446
Mtpap	3.32421942274205	1.04559706273253e-07
Mtus1	1.34813726564896	0.0133689864236906
Mtus2	2.50759315636991	0.000228687583168287
Muc20	5.14074465519745	2.71926987363398e-11
Muc4	4.85252333612207	1.01567734248748e-11
Musk	1.90270991629266	0.00315529150460773
Mxd1	1.99642868603518	0.00206910228329248
Mxra8	2.4058602797638	0.000410124181974034
Mycbp	2.08678594438201	0.000775768125681311
Mycbp2	1.94348233194882	0.00208478828297515
Myh11	3.53017882804338	7.9202904857672e-08
Myl12a	1.43626126531316	0.0120815419707368
Myo18a	2.31432816218186	0.0023220927342284
Myo1d	2.16857298981201	0.00596913192994311
Myo1e	4.00485164914911	4.73767980668359e-11
Myo5a	1.65887822803433	0.00345505047579992
Myo5b	3.49553635998475	8.09225658815013e-09
Myo7a	2.39106493539733	0.0273305376929908
Myom2	2.48624555329062	8.78688386713982e-05
Myrfl	2.06821990470025	0.0276999927600257
Myzap	3.64079386053508	0.00901001404608712
Naa11	3.00633838576008	0.000617201495860048
Naa35	1.3163995723387	0.0193836142529631
Nabp2	2.25606970927879	0.00333913202944353
Nae1	3.47134961232087	0.000683069897907182
Naip1	4.24147192934615	0.000757697365223276
Nanos2	2.83987958364978	0.000781367605876531
Nap1l1	1.24433787804841	0.0292050352908107
Nat14	2.85028031889114	0.00397581367324674
Nat6	5.82795395085938	0.00178533453892288
Nav1	1.90962513318537	0.00459705802887009
Nav2	2.24627303111882	0.000115329537253487
Nckap5	3.17646972271798	6.85933671326014e-07
Ncoa4	2.37374314325994	6.60507121593498e-05
Ncoa5	3.40497544661632	0.0449239048245991
Ncoa6	1.09778303111819	0.0364287472219582
Nde1	1.27504178324768	0.0374950895293004
Ndfip2	1.67638722968924	0.001198235161139
Ndnl2	1.40149886168908	0.0218502982896485
Ndrg4	1.6327860428429	0.0200210580347465
Ndufa10	1.98488179838736	0.00922817399105667
Ndufa4	1.53424601632685	0.0365386186504835
Ndufab1	2.7223005817885	0.000125696952443544
Ndufaf2	1.68396144511983	0.0107644761108985
Ndufaf4	1.36936451514979	0.019388231798016
Ndufb8	2.43008250800767	0.00264168341612708
Ndufs6	2.3820104128428	0.00609318545353805
Neat1	3.44404681439656	0.0348728246876086
Necab2	2.54703146779938	0.000663579760167097
Nedd1	1.03074956233346	0.0381382739452471
Nedd4l	5.14193285907976	0.00696863166210372
Neil3	4.21395067215124	3.02477845059532e-06
Nek7	1.68244981843449	0.0163688653083407
Nell2	5.13668298719245	9.16070435021189e-05
Neurog3	3.48718790055147	0.0429276697834675
Nexn	2.2821858765398	1.65073012266284e-05
Nfatc1	5.35822720099461	0.0237457368189682
Nfil3	1.50713505978543	0.0265809093413319
Nfrkb	1.9364795738685	0.033760566465464
Nfxl1	1.58225648521409	0.0318295370215512
Ngef	3.46370711361549	0.032879338553775
Ngly1	2.616451047453	0.000155362729960883
Nhej1	2.54064890494148	0.000155479705069679
Nhlrc2	1.85292463606014	0.00885670702789178
Ninj2	1.7633445900839	0.00741508192209436
Nipal2	5.22989411479401	0.00397503026516271
Nipbl	1.75588159541711	0.00397503026516271
Nit2	3.22508916998275	1.34958363012078e-06
Nkiras1	1.90726087221121	0.000983254314568022
Nlk	1.35872562192404	0.0395050981448243
Nlrp2	1.88920890494011	0.0102608860594874
Nlrp4a	4.15257791988498	7.49603003201471e-07
Nlrp4b	3.69309716563198	0.000470793782640834
Nlrp4e	3.38944829371564	1.20310092499078e-06
Nlrp4f	2.76970954028955	0.000884780948960102
Nlrp4g	2.47183268676063	0.00106255566203824
Nlrp9a	2.4226605189075	3.81902401637436e-05
Nlrp9b	4.32471183168921	1.44883691822938e-12
Nlrp9c	2.84978191825188	1.27334097785716e-06
Nme3	2.03643727675705	0.0168323893225722
Nme7	2.55609416801114	0.00657545842895085
Nnt	10.1742822937259	1.45746868480214e-08
Nobox	4.16460201541277	7.118113458189e-05
Nol4	4.77388051280091	0.00861611554262157
Nono	1.44886351785787	0.028368728203659
Nphp1	4.95746207205508	1.785791813611e-06
Nphp3	4.09810275660766	4.0522194234523e-09
Npm2	2.65172892703808	1.18929722806863e-05
Npm3	2.0464753523248	0.0248813886712188
Nprl2	3.74841947413549	6.09579634017149e-05
Nqo1	2.54863750263812	0.000792823279982461
Nr2c1	3.32497267458292	7.18891026024491e-06
Nr2e1	4.43037344318001	4.09760254355742e-06
Nr2e3	4.94688799220074	1.27194876717467e-09
Nrep	1.72985048971426	0.0202234840622409
Nrg3	6.16349361092843	0.0136817185524815
Nrg4	2.10251406843335	0.00844320433086999
Nsd1	1.61346253524828	0.00670047470688009
Nsdhl	2.86375300946344	0.00242661482994394
Nsf	3.28076607925756	5.72669449632948e-08
Nsg2	4.24738872587908	0.0263640998955095
Nsmce4a	1.28581450446592	0.0140263589436937
Nsun3	4.01959095549087	0.026223997502982
Nsun4	2.20180298331629	9.63638593819952e-05
Ntpcr	3.16427238857682	0.000199553286216351
Nubpl	3.83191209776676	2.79090544692525e-06
Nudcd3	1.66443692595101	0.0130900466001523
Nudt14	3.33232245289411	0.0110942522474498
Nudt16l1	3.20268052074958	0.000424907195788779
Nudt19	1.8622100483173	0.00254912829773518
Nudt5	1.87758091797113	0.000977075846738305
Nudt7	4.45344042161536	7.2535566605597e-07
Nuf2	2.92736312868612	2.4927193519573e-05
Nup214	2.18286509624769	0.000132998218543665
Nup37	2.79371463134809	0.00274071010248908
Nup85	2.37962884031904	0.0292824328301984
Oacyl	3.02808077853121	3.15110764592302e-06
Oas1c	4.10828234329852	2.87136263895373e-11
Oas1d	4.25218912312361	7.05318679897741e-05
Oas1e	3.77628753359781	1.40631593549715e-07
Oas1f	3.42552999125741	0.00473284041355192
Oas1h	4.65948321672352	4.0522194234523e-09
Obox1	4.41980698747454	3.35948893978302e-05
Obox2	4.61960385696383	1.06542107032211e-07
Obox5	3.83724069471624	3.40294624796813e-09
Olah	2.99581089094001	0.028503722236448
Olfr1300+AC0-ps1	1.89442727685893	0.0442901295484406
Olfr288	2.46088788648762	0.000293145129704015
Omt2a	1.27307440792249	0.0156271715394225
Omt2b	1.48884443799753	0.00435644495024423
Ooep	3.51813292124944	0.00022215893889439
Oog2	2.60512998085006	1.54084593872368e-05
Oog3	2.84536386061857	0.0186508032073636
Oog4	2.21718457169021	0.000159889247993693
Oosp1	3.02549549270231	4.4058025882775e-08
Oosp2	4.53181673316326	1.30243224761949e-08
Oosp3	2.45369217242617	0.00113556226510198
Opa1	1.95312326162995	0.000692472061771235
Ophn1	1.62842134793804	0.0190362928218805
Opn3	1.55627328783523	0.0411032401498095
Orc3	1.97661784218873	0.00100381814584029
Orc5	1.75909951687501	0.00225819226124445
Ormdl1	3.14378664475765	0.0191786382033382
Osbpl1a	2.93375364931331	0.00181917625827589
Osbpl3	7.2292559334147	0.000319997708234753
Osbpl9	2.15823026022776	0.000908067538647959
Osgepl1	3.02112370358136	0.00053775640783841
Osmr	5.62866054865788	0.000161545457369673
Oxct1	3.68106462059884	2.44252070919161e-08
Oxr1	2.65239632944514	0.000556183116724301
P4ha1	2.15074111850112	0.0202335700237788
Pabpc1l	1.43234110834662	0.0499787367326717
Pacrg	2.72551439105367	0.0379968151350349
Pacrgl	2.58616895979194	0.00022135208408815
Pacs1	1.68563348100025	0.0069603972689559
Padi6	1.71255384536969	0.0280480967170443
Pafah1b1	1.58809950870086	0.00427043434846437
Paip2b	1.43798519130251	0.0089535234854313
Pak1	2.21519343730983	0.000335088081304936
Pak4	1.80230497699562	0.00178756903973962
Palld	1.66364362546016	0.00947684195726003
Pan2	2.45904879567734	2.88311398826506e-05
Panx1	2.56872254703493	0.0454156166859691
Paox	1.86248645986235	0.0151707197526916
Papd4	0.992710224568819	0.0426844377150783
Papss1	2.54204358675495	1.80494136362256e-05
Papss2	4.05088149346696	3.56332578447119e-05
Pard3	2.51003972390796	4.13522101384611e-05
Parl	3.2018148551201	2.4625530938138e-08
Parn	2.06876314669709	0.00132377134250417
Parp12	1.38071311464364	0.0112375764988735
Parvb	2.83201089891397	0.037939083205189
Pbx2	2.57734400899689	0.00489111078310362
Pcbd1	3.24204121208979	2.08465589677692e-06
Pcbd2	1.73521233805128	0.0229246809212519
Pcbp2	1.89398531901399	0.000821688593365033
Pcbp3	1.47563249196206	0.0385584203855033
Pcca	2.40512209987018	0.00654805210417956
Pcdh15	1.61217720844861	0.0107788540992913
Pcgf3	1.52633241841256	0.0106269126133106
Pcid2	3.06647984218474	0.00749790104313225
Pcm1	2.11290289615484	0.000153656014046358
Pcolce2	6.0220796160244	9.50502577272263e-10
Pcp4	8.82936954660154	1.80494136362256e-05
Pcsk5	5.79060496292327	0.0364050647258585
Pcyox1	2.05070934144464	0.0072241412974534
Pcyt1b	1.78155556824347	0.00668970439062414
Pdcd4	2.35368047281076	0.00728717829445009
Pdcd6	4.85266001254779	0.000605788264247656
Pdcd6ip	1.79781838609594	0.00156241614066142
Pdcl3	2.76277741768121	0.00799122037579504
Pde10a	3.331167357556	0.000213695617473742
Pde1b	3.41140968096448	0.00250895136297549
Pde3a	5.14001970421339	0.000190735707951919
Pde4d	2.45072563074129	0.0235204090172466
Pde4dip	1.98967962446076	0.00137185546123932
Pde6d	1.85067118570884	0.00249829464922466
Pde8a	3.18028420696727	6.84440598904402e-05
Pdhx	2.63832655811455	6.01424399601489e-06
Pdia5	3.18142428950405	1.32749323320704e-05
Pdk3	1.32427487942536	0.0200391109487084
Pdlim1	2.22535081662442	0.000151363164293345
Pdlim2	3.65917817882641	1.15441462870574e-05
Pdlim3	Inf	1.54079412038409e-05
Pdpn	2.1001444493486	0.0160814438725077
Pdzd2	1.30467533252921	0.0361291370990249
Pdzk1	3.17630004797527	1.64184700128304e-05
Pecr	2.29357977932013	6.60507121593498e-05
Peli2	7.82119540828997	3.27042983473116e-07
Pex1	2.92063523191409	0.00216212930270157
Pex13	1.7857811444355	0.0122329169796784
Pex26	2.55521300693346	0.0140751049166874
Pex7	1.98527453188373	0.0160367101010771
Pfdn4	3.28568944389578	0.000349257019382246
Pfn2	2.36958432841262	0.000455998322483424
Pgap1	2.35870817208204	0.0266895996448531
Pgs1	1.65969955546843	0.0038455197023449
Phactr3	7.12972565961217	3.33341841388207e-06
Phf14	2.00456482958308	0.000439250380355505
Phf19	3.93301109521992	0.028890688979355
Phf3	2.35625629402278	3.49322729411233e-05
Phf5a	1.19601797667718	0.0378518538400075
Phka2	3.09930524119302	0.00187630890435581
Phospho2	2.47193910467154	1.12311415803265e-05
Phyh	2.96904605990676	2.69961010212881e-07
Phykpl	3.59031334449076	0.00299474732604176
Pibf1	2.22942812279771	0.00761215340324301
Pid1	2.56217837700988	1.14430663473848e-05
Pigc	2.71206135442396	0.00364589955104869
Pigf	2.08392773392062	0.00865040746616223
Pigk	4.10992930457083	0.00360042528454007
Pigp	2.3297666788919	0.0163628663939622
Pik3cd	2.47129740582609	2.72938390394358e-05
Pikfyve	1.35969241915574	0.0342944939781117
Pinx1	2.39949518296184	0.0388606074259342
Pirb	8.95751257520486	0.00381271523836774
Pitpnm2	2.9001181217327	0.00022826484639832
Piwil1	1.85884573456034	0.0219196180496484
Pja1	2.00341553115987	0.0394567247397498
Pkd2l2	3.24173218439952	1.4919930165454e-06
Pkib	3.72049642969014	0.00211628794375273
Pla2g1b	5.88238381658565	4.57483120517167e-08
Pla2g4a	10.4329825486728	1.94864762571794e-06
Pla2g4c	2.21782079896671	0.0375388750911013
Pla2g4f	3.60050162338659	0.0200210580347465
Pla2g6	1.77921498714878	0.020575919358651
Pla2g7	8.68480041349019	0.00281718616290457
Plac8	3.57680639754054	3.99102412003163e-08
Plat	3.50501373778289	5.19009884208723e-07
Plce1	4.40447924118552	4.4356737665583e-10
Pld1	1.76366027124001	0.00264650258211116
Pld2	1.44009089783608	0.0232307638364288
Plekha2	1.5727449184086	0.044187253733549
Plekha6	1.84416093788439	0.0258881876563336
Plekhb1	4.16005000087415	5.1301774474004e-12
Plekhg1	2.5700549311752	0.000122950709506664
Plekhg3	2.33361631795202	0.00111576390695614
Plekhh2	3.8177717543862	6.62838500359623e-05
Plekhj1	1.55987903259719	0.0352442139973333
Plekhs1	8.31028957483722	1.87831261330545e-07
Plet1	4.76731763762425	0.00238097017527389
Plk4	1.05933638384421	0.0422158242173434
Pls1	2.77931389706617	2.39187526562342e-06
Plxna2	2.30850080420169	0.028101889219402
Plxna4	3.21141745466739	1.27334097785716e-06
Plxnb3	3.19428507338596	0.0132248911592499
Pmp22	8.5234408493676	0.00229866675451685
Pnkd	2.21923262487547	0.000811461918611469
Pnp	2.8780885901905	0.000287071621097785
Pnpt1	3.31112862557467	0.00688513742055946
Poc1a	2.20910589270148	0.000575939607871263
Pola1	2.05319230838243	0.0104615781714922
Polb	1.39898913748273	0.0291527699665472
Pold3	1.72532725280406	0.00428795764399975
Pold4	5.21621512887803	0.0127320407267714
Poli	3.23188991189446	0.0014224733698637
Polk	3.20926863440473	0.000788528010485631
Polr2c	1.84735689576612	0.000773680765230175
Popdc2	4.01605966351625	0.000522977513242472
Postn	2.5005665294794	0.0153400004162474
Pot1a	2.53480371096194	0.00372502264444095
Pou5f1	1.47339168550986	0.0177983209833489
Ppa2	3.092881849099	0.0165332834540282
Ppap2a	1.81537262569767	0.00888696928689207
Pparg	10.4459535146255	4.59362753042904e-06
Ppef1	4.71933738170891	2.35588085786229e-05
Ppfibp2	2.81726090216974	0.000118691005224312
Ppil4	1.84588606430582	0.0435112146791768
Ppil6	5.35464001682272	3.33489996190411e-06
Ppip5k2	1.45961101232062	0.0459122271292535
Ppm1e	2.1126178064428	0.00772554600275435
Ppme1	2.87369884414856	0.0028501620818437
Ppox	3.6990531311773	0.0180166074500596
Ppp1r10	1.44842224985696	0.0112735239712047
Ppp1r3d	1.84883623461925	0.0450959068895682
Ppp2r3a	2.55891427472484	0.0172030042877355
Ppp3ca	2.99336938936487	7.01593641383795e-05
Ppp3cc	3.04178862312815	0.0260415029344162
Ppp3r1	1.30959528521449	0.0153400004162474
Pramef12	1.72607048257342	0.00183367147204266
Prap1	6.15429602644436	0.0003280474345244
Prdm1	3.30699747452587	8.14041366235947e-06
Prdx1	1.59971469943006	0.0113330292604552
Prdx2	2.37489785781594	1.1676499277529e-05
Prelp	1.95017551833259	0.00361263894720185
Prep	2.04780763086297	0.00453334199723896
Prepl	3.82228485964476	0.0117814731210629
Prex1	1.84937918712973	0.049025511820573
Prg4	3.8197717923873	0.0100012441063629
Prkag2	2.80696056664391	0.0367565170383303
Prkar2b	1.57271707151571	0.00842106435455741
Prkd1	1.81164994821999	0.00574019160149619
Prkd3	1.4625327347694	0.0485659635735081
Prkg1	1.78390243082484	0.0108548459067576
Prmt2	2.85749453807768	8.02222098332629e-06
Prom1	2.39823659705399	0.0205015867272597
Prpf6	3.22839259780657	0.000309509225962013
Prr5	2.77068883373822	0.0352360047509897
Prr5l	3.2237081767947	8.4745339959387e-07
Psen1	2.87172823609732	8.96672485699927e-05
Psen2	2.41041080854317	0.0036165417411585
Psenen	4.74125646034603	9.13251880738786e-15
Psg17	6.57500567808888	2.47081590225604e-05
Psmb2	1.37903857397409	0.0233900759952937
Psmb3	1.46767588612992	0.027256429115427
Psmb6	2.61127391863637	6.21838557134421e-06
Psmd10	2.17097782932188	0.00218547614194333
Psmd9	2.32451730293977	0.000180027206232713
Psme3	1.54707947629051	0.00437118722182799
Psmf1	2.47693629153128	0.000422847037353143
Psrc1	3.86837527886355	3.1945250316422e-07
Pstpip1	5.77329713894346	9.88147082995276e-05
Pstpip2	5.22334490816333	2.29210680268787e-05
Ptbp2	1.66967226881075	0.014049161481285
Pter	2.3281859508766	0.0363601492786769
Ptges3l	3.37664819793374	0.00179568350652907
Ptk2	1.41338508187151	0.0180233017276585
Ptk2b	4.81314929931521	0.001269418772398
Ptov1	1.96016722529691	0.0320266279415991
Ptpdc1	1.66370015499885	0.00772554600275435
Ptpn13	1.64007060635005	0.00867121123542466
Ptpn21	1.30242507391268	0.0276710646565184
Ptpn22	4.0894513376525	4.33545996614012e-06
Ptpra	1.59263040780957	0.0303655373693959
Ptprc	Inf	0.00872379423747523
Ptpre	3.26654923183749	1.88775875048527e-06
Ptprj	1.94753677335608	0.0392505917209883
Ptprn	4.08404840734349	0.000998658360723064
Ptpro	2.16478017080922	0.0331494643639196
Ptprr	1.76015053505969	0.000887529691422946
Pttg1	3.66868340884603	2.3394949279347e-10
Pvt1	2.92834675514542	0.000375468969921127
Pycrl	2.73794964878813	0.000591323714942981
Qser1	1.35907533247519	0.0240073165694315
R3hdm4	2.05091903298099	0.00216212930270157
R3hdml	3.51628823678745	0.0088789461214859
Rab14	1.5329777872797	0.00599486065237112
Rab18	1.39655659798208	0.0218995002317188
Rab1b	2.9818121831469	0.00699453867943945
Rab25	4.36983049194138	1.32228856203394e-07
Rab27a	2.0950359502935	0.00635047862406474
Rab2a	2.01045497000919	0.000351042028519176
Rab32	2.96485647563208	1.62685985671999e-05
Rab38	2.81745231082035	4.35711586735334e-05
Rab3b	3.82161870198741	1.33463755518263e-05
Rab3gap1	1.61521311052101	0.0149672973531939
Rab3gap2	2.87576980906466	6.66763944986088e-06
Rab3il1	2.34465675540313	0.0163833832953038
Rab4a	2.14902269433593	0.00123714010436044
Rab7	1.39039440727443	0.00688513742055946
Rab8b	1.21175305262293	0.0260272171326009
Rab9b	4.72681185481119	0.0158271655342839
Rabgap1l	2.78128509237867	4.06219889818497e-05
Rabl2	1.65258511199901	0.0095743261596908
Rac1	1.3435882705635	0.0169908301306584
Rad23b	1.15400659935199	0.0363884615363276
Rad51b	4.56092749758414	0.0462605493524837
Rad52	2.01177470751551	0.00928323158571318
Raet1e	6.42905330155787	4.91324135486829e-05
Ralbp1	2.0702838173072	0.000130732660668654
Ralgapa1	1.70178502277467	0.0233128005849039
Ralgapb	1.46912273874628	0.0291581522924112
Ramp2	2.44681575264567	0.0424961895680112
Ranbp9	1.23907365613274	0.0182926060318491
Rap1a	1.72107816774351	0.0135818350530779
Rap1gap2	2.35827907459153	0.0140087485924403
Rap2c	2.5485479528217	0.00618028870185737
Rapgef5	1.8023756332736	0.00318226238611741
Rapgefl1	1.77717741219617	0.0195077218957156
Raph1	2.42149507241057	0.000249213053276192
Rasa3	2.47842797253087	0.00218867319748035
Rasal1	Inf	8.34265123106013e-05
Rassf1	2.4767909752451	0.00283388577759234
Rassf4	3.57073460594211	0.00803447494340547
Rassf5	1.88057476349284	0.00236930008624444
Rassf6	2.94534320680501	0.000922994810879866
Rbbp9	2.92377128172722	0.0125627763838135
Rbl1	1.72447801179134	0.00825559847944563
Rbm18	2.69211892009765	1.32087241591481e-05
Rbm7	1.79790762511931	0.0236133875896627
Rbpms2	1.84358916605927	0.000894292855121414
Rbx1	1.57253195247252	0.00603607366358836
Rchy1	1.56825911591633	0.00288888542714627
Rcn2	1.6602933344676	0.00630188955898463
Rdh11	4.21282918219461	1.82510441009072e-10
Rdx	1.58188051715913	0.0208250919744814
Reep2	1.93921650150768	0.00227572041407223
Reep5	1.93503429755041	0.000932838165917418
Reg3g	2.82970475026819	0.00650945154604423
Rela	1.71933061463336	0.012327156672237
Retnlg	7.69679439975405	0.00808926308260482
Rex2	1.7657340014646	0.0139690263518595
Rexo2	1.85412268220167	0.00253368846330155
Rfc5	1.83281604254879	0.00362332692794873
Rffl	1.39508559991383	0.0359032035945875
Rfpl4	4.96908385326272	0.000703133149165609
Rfx5	1.5651529087013	0.0304025667695461
Rfx7	2.04536923236893	0.0353441948224037
Rgn	1.4992191971581	0.0185159590499724
Rgs10	3.54895626721705	1.90187444987025e-06
Rgs12	4.93250752966111	3.65276028979635e-09
Rgs17	2.208339552569	0.000697098104506342
Rgs19	3.23482298566253	0.00107383293769832
Rgs2	5.6681554006278	0.000721787273972849
Rgs3	3.30751846436629	0.0173841010514709
Rhbdf2	3.84137618982728	0.0133407146172181
Rhd	2.84543831026323	2.90287601370973e-05
Rhobtb3	4.17954033362154	0.000941760183271869
Rhoh	3.47442791089048	0.00586882574843347
Rimkla	1.91829312943183	0.00107312273079216
Rims1	7.71105566195607	0.000923192092626519
Rin3	3.87955585182317	0.000798998251688755
Riok1	1.98453477492453	0.00955633136000253
Ripk1	1.85468941511211	0.00745828361143893
Ripk2	2.61280774271698	0.000211016230737303
Rit2	2.79392665550606	0.00568208874884681
Rn45s	3.48688089921885	0.000158110681478682
Rnaset2b	3.16849742316013	0.000188605478666323
Rnf113a2	1.59401559210313	0.0114019260485355
Rnf114	2.38198432580386	0.00260267920954762
Rnf169	2.59704601423044	0.00014709977315063
Rnf170	1.97010326766918	0.00531354510757502
Rnf181	1.39115840562303	0.0243927728705019
Rnf185	1.77885637233338	0.00213678685939835
Rnf187	1.87548130255417	0.00135532462532614
Rnf214	1.37397435696599	0.0203035877465246
Rnf219	3.37782877287306	7.61566719590301e-05
Rnf220	1.9266730205195	0.00264650258211116
Rnf24	3.28637477092442	1.00004743735188e-07
Rnf32	2.27005526778223	0.0153647937513919
Rnf34	2.45953696615723	0.000486127192918412
Rnf38	1.27120570232273	0.0192087788837451
Rnf5	3.35415408763747	6.41372960057528e-07
Rnft1	1.31301353729069	0.0253202176386589
Rnls	3.75436626420404	0.00344107412830226
Rnpep	1.6761687014889	0.00456782471853675
Rora	2.80816259265085	0.0293488895321284
Rpa1	1.46275636403577	0.0202406304685091
Rpa3	2.32360908433534	0.0374950895293004
Rpap2	4.07321242652757	1.13430895749806e-10
Rpe	1.23728646191017	0.0303751044326892
Rpgr	5.28269061628961	1.37673237368644e-06
Rpgrip1l	2.40365183641741	0.000772560494622623
Rph3a	1.27561466987682	0.0218995002317188
Rph3al	2.32148540557516	9.43524464430532e-05
Rpp25l	3.71680910503286	0.0165440731714162
Rps27l	1.23340108182119	0.0295965682455744
Rps6ka3	2.41403098178097	0.000132158627406653
Rps6kc1	3.06656217149859	0.013976005844157
Rpusd4	1.70877811972936	0.032879338553775
Rraga	2.6131874350646	0.0172940319509031
Rragc	1.195067385269	0.0279995336680607
Rras2	2.20648809287262	0.000117369606561556
Rrh	4.01373187561011	0.000153656014046358
Rrnad1	1.53818417267396	0.019656679503809
Rsl1d1	1.28678259137999	0.018954228937586
Rslcan18	Inf	0.000151926007689402
Rsph3a	5.11484259103172	3.51077591545394e-08
Rsph3b	4.8109979471842	1.33676465090795e-08
Rspo2	1.88814995428412	0.000592629844890485
Rsrc1	2.17845453839012	0.0018429439254339
Rsu1	1.73256162579573	0.0109120948137587
Rtca	2.65657587505447	0.0277132541811286
Rttn	2.62710347128218	0.00012617479095569
Rundc3b	1.95774088952861	0.00570477766843914
Runx1t1	2.29652120238747	0.000452200910334537
Ryr2	2.89080269879402	0.0477617707260653
S100a11	6.64992025103416	0.00163346419939071
S100a8	10.6843523210742	0.033173713623174
S100a9	9.37809750256584	0.00135882713294552
S100g	9.55492568794912	0.000775217610681333
Samd10	2.24266100732219	0.00369998003796126
Samd7	3.75209415476893	2.00754393996864e-06
Samhd1	2.64245300930404	1.55709139249059e-05
Sar1b	2.27350628663456	3.93562460610882e-05
Sars	3.99069295780834	0.00120096246480771
Sash1	3.0138952404364	5.47628539849311e-05
Satb1	2.03551520712042	0.0015264358629532
Sbf2	1.36674977357542	0.018144845409155
Sc5d	2.97084570913346	2.89471591585468e-05
Scaper	4.06599952902962	0.00010469085035378
Scarb1	2.08615459471245	0.00342883689056384
Scin	2.74790299270281	0.0214742383830668
Sclt1	1.26596636897082	0.0430792636371207
Scmh1	2.01580333979059	0.00207628586900067
Scn10a	3.87233349029085	8.26123648478818e-05
Scpep1	2.04758334372591	0.00061553089305414
Sdcbp	3.00731243260103	0.0080331826683
Sdha	3.25003913571146	2.55724070099219e-06
Sec13	1.96712846629813	0.000667009884886253
Sec14l3	4.50459653720503	0.00395225039228818
Sec22a	1.49341461631864	0.0194005185784057
Sec22b	3.1029059884527	0.000223911001799232
Sec23a	1.56298157249069	0.00582606290730315
Sec24b	2.57663685248602	0.00640102668712412
Sec31a	1.27472092945558	0.031193917518224
Sec61b	3.8263667148954	0.000144207064428203
Sec62	1.83259720384578	0.0122004177274505
Selenbp1	4.58106240307745	0.0145322183124024
Selp	2.62513806411672	4.22148537860901e-05
Sema6d	1.70064204927178	0.0292325872114923
Senp7	2.71989295601809	0.0218907546837704
Senp8	2.43049388500771	0.000614977617330556
Sep15	1.94876088772055	0.000871703521480969
Sepw1	1.79779947161723	0.00208136414219603
Serf1	3.59818403198994	1.00004743735188e-07
Serpinb1a	4.53158296601292	0.00063664617378363
Serpinb8	8.61924650574914	0.00457102901244851
Serpinb9	2.15198556905766	0.0474284893764935
Serpinc1	2.21415972657033	0.00415730063699679
Sertad3	3.15178326907088	0.0143865213591402
Setd4	3.83598828242207	6.11715916377108e-05
Setd6	2.88618330198613	4.09056974699721e-05
Sf3b3	1.53183922583314	0.0114053305404911
Sfmbt1	1.8406383917954	0.000810127282882929
Sftpd	7.63834746006446	0.0046998026983561
Sgcd	3.49828641930643	0.000356662853630522
Sgms2	1.71503605144933	0.0113330292604552
Sh3bgrl	1.97316475432308	0.0014223558496601
Sh3bgrl3	1.53204968181351	0.0116697218886015
Sh3bp2	2.55838931156007	0.0215237455119126
Sh3gl2	3.44066737045588	0.00956088853927123
Sh3glb1	1.71010809172682	0.00367276453122212
Sh3glb2	2.7275150304739	0.00578851096214331
Sh3rf2	2.64643968997528	0.0160747316433973
Sh3yl1	1.56065139458581	0.00833762345656749
Shcbp1l	3.98361734233761	2.60221371274258e-07
Shisa5	2.25674759335497	0.000429178880917631
Shoc2	1.1927624597373	0.0458918745047799
Shroom2	1.97491283372065	0.000776827294625028
Siae	6.29558658043594	1.6121079340137e-06
Siah2	2.06936369451339	0.000265949350447654
Siglec5	3.16719601502192	0.0118508334946416
Sin3b	2.51559435651465	2.08065865848699e-05
Sirt2	2.52447495639555	0.0258269033036589
Sirt4	2.35301855657626	0.0291502308833243
Skap1	1.57475458053087	0.0348591282865623
Skap2	1.59659477024541	0.00515017154638888
Skp1a	1.76966292633877	0.0418297283214412
Slamf1	2.76919286333779	0.0328879843113241
Slbp	2.59899363893694	0.00439714521772585
Slc10a7	2.00992468693386	0.0335898913968664
Slc12a5	2.99605319503968	0.00772554600275435
Slc14a1	5.98213687594512	0.00236585111793531
Slc15a2	3.71347380074192	0.0364907291634799
Slc15a5	3.00295322699181	0.0105318688957005
Slc16a13	2.65419928628313	0.042858313000808
Slc20a1	1.89858691755122	0.00335815640066937
Slc22a23	2.24261889147755	0.000325504653956425
Slc22a3	3.72470606678114	0.000894819927953771
Slc23a2	1.85364979698693	0.00241323111165677
Slc25a12	2.03385490064028	0.0235469187140968
Slc25a13	3.74017181341256	2.99157618765763e-07
Slc25a15	1.20969480236454	0.0441419030103266
Slc25a26	3.69921841058556	0.0499208967074917
Slc25a35	3.37696861522511	0.00641548663306118
Slc25a48	6.93042546025793	6.30895930556353e-07
Slc26a5	4.49480015168404	1.31391087056859e-10
Slc26a9	2.32939441152027	0.0028162438093984
Slc27a2	9.55910597902617	0.000553202687935206
Slc2a12	3.51001099684515	0.000151926007689402
Slc2a9	3.86465446457379	0.0346963191978835
Slc30a3	4.16977826840578	6.69619274974671e-12
Slc30a4	2.1990220094164	0.00587575370959974
Slc31a2	4.24774097797955	3.21409826348422e-05
Slc34a1	3.60032798482217	0.035245541982016
Slc35a1	1.96188520030371	0.0074236254152846
Slc35a4	2.03510206182002	0.00348382280325762
Slc35a5	1.2850786706781	0.0444080129848514
Slc35b4	2.86655812466728	1.34272537809987e-06
Slc35c1	2.24511304821057	0.0155932144698363
Slc35f3	10.6782945204085	9.46160894138054e-11
Slc35f4	Inf	0.000315455096979813
Slc35f6	2.33541864820132	0.00112157675740206
Slc38a7	1.41183109348448	0.0239252836211438
Slc38a8	1.61266130026712	0.0403668597498453
Slc38a9	3.27282817020614	0.046682079268735
Slc39a8	6.56984414125128	0.040325550254834
Slc3a2	1.33650558193402	0.0335724679673505
Slc44a1	2.04604688075294	0.00364057674202178
Slc44a3	3.69909175555544	0.000160277127698576
Slc45a3	1.48776111737511	0.00913893508364711
Slc4a1ap	1.252948118487	0.031344069275318
Slc4a5	2.58018621280593	0.00214757685619915
Slc4a8	2.50391286319175	0.000194055391168942
Slc51b	2.99475071595088	0.0389586835220242
Slc6a20b	3.77472747021441	0.0232494820325537
Slc6a4	2.92733331162499	0.0273305376929908
Slc6a6	1.14802183751705	0.0435563025249098
Slc6a9	1.91418830397754	0.00528137588615174
Slc7a11	3.06980392986708	9.23425556305391e-07
Slc7a2	2.892258803584	0.00138301136260604
Slc9a4	2.39095523830145	0.0378507090006908
Slc9b1	2.09078115833874	0.00482656775726298
Slco1a5	5.11344381414829	0.000282587661223108
Slco3a1	2.47858097825443	3.01747270528768e-05
Slk	1.68758339369729	0.00622523390553394
Smad3	1.39079040274482	0.0267409798003871
Smagp	2.09742553984846	0.000262675285869816
Smap2	1.3284499580832	0.0215414294523062
Smarcal1	2.52561128648582	0.000428262039411604
Smco4	4.59794471087205	4.27650333613645e-10
Smim11	5.1132184089427	1.49256029956612e-15
Smim14	2.93574812187127	5.76987988902342e-08
Smn1	2.35441350696572	0.00519323517037401
Smoc1	4.38583913059387	0.000334323622403089
Smox	2.5606993574752	0.0014203868249742
Smug1	1.50575920819123	0.0291394320977871
Smurf1	1.55815041555152	0.0244482035090242
Snapin	2.09441373447517	0.000969442775482191
Snrnp27	3.6461282908972	3.1484013897849e-09
Snrpb2	3.75574809927008	0.00094079032071684
Snrpd1	1.08703999896171	0.0421299405830024
Snrpd3	1.79164902936865	0.00132813124592442
Snrpe	2.3915792202315	0.00240127806442734
Snrpf	2.17014447173756	0.0301326706098406
Snx24	10.1634983023941	0.0454921123046963
Snx4	1.96158332431529	0.000648079877004798
Snx9	3.73592366510095	6.39417187836335e-07
Sorbs2	2.32760342596738	6.36986867487161e-05
Sox6	3.52908390704324	3.79103280309299e-05
[truncated: 450 more rows]

## Sheet: Table1-sup1 Downregulated-2Cell
gene	log2fc	pval
0610005C13Rik	-3.46814410696227	0.0256721418658696
0610012G03Rik	-3.30218689279672	1.29229130186268e-07
1110006O24Rik	-4.2892546685443	0.0480933351674642
1110034G24Rik	-3.057305449968	0.000330999022119903
1500009C09Rik	-3.89690673296208	0.0403565181116835
1600002H07Rik	-2.31490465855657	0.000744672220367637
1600002K03Rik	-4.31806530110313	0.00246142980820326
1600012H06Rik	-6.4092055641275	1.25359509704703e-17
1600015I10Rik	-4.11512579054719	0.00218867319748035
1600020E01Rik	-3.37893069732986	0.000228687583168287
1600025M17Rik	-8.47415059654615	1.4771780052549e-05
1700012D14Rik	-8.05208750452548	0.00740784737129527
1700013H16Rik	-6.18546818240312	0.000104408164678555
1700020I14Rik	-1.96568536266668	0.027152871907575
1700021F05Rik	-5.53831602191601	3.55381897698199e-11
1700034F02Rik	-5.52936452992339	5.90826449809541e-06
1700034H15Rik	-4.58714911401126	4.52429084923314e-10
1700061G19Rik	-3.04678769086875	0.00101710514169277
1700069L16Rik	-3.42514646301996	4.73062659470118e-05
1700084E18Rik	-Inf	0.000258468986824947
1700096K18Rik	-5.01857824011029	1.88513431769471e-09
1700123O20Rik	-3.30061456598378	0.00270847820993518
1810013L24Rik	-1.73428622914037	0.00276344891385094
1810026B05Rik	-1.66615988495446	0.0342255167043486
1810026J23Rik	-2.20680123697753	0.000674940994730057
1810043H04Rik	-3.26832712306274	0.0364381727836223
1810044D09Rik	-8.3719517674884	0.000302544281945654
2010320M18Rik	-5.9492585267539	4.58509830627235e-05
2210011C24Rik	-5.11672865061196	0.00506933406541398
2210016F16Rik	-2.44741299715297	0.00492240739803851
2210016L21Rik	-2.43650468548032	0.00784483147315008
2210039B01Rik	-2.39817789733162	0.000178783461290605
2310011J03Rik	-4.84972471708602	8.20430048597572e-06
2310014L17Rik	-3.88759716581723	0.0225650625392325
2310036O22Rik	-3.09720813561381	4.69601779840931e-07
2310040G24Rik	-2.59148499478134	0.0202234840622409
2310047M10Rik	-4.23555029360536	0.00710885228228827
2310057M21Rik	-2.66837768494022	0.000806481122727586
2410002F23Rik	-3.82232824299277	0.000153620060676597
2410004B18Rik	-1.15239229046823	0.0429386961295131
2410015M20Rik	-2.92436120739996	0.0029104416984317
2410016O06Rik	-6.32541895777232	8.82708255862812e-14
2500004C02Rik	-1.8565606101073	0.0199192233621638
2510039O18Rik	-4.61970672683312	1.2883625615105e-05
2610005L07Rik	-2.62575701531894	0.00427785729952773
2610008E11Rik	-7.23184703759926	0.0342013652743674
2610020C07Rik	-10.5673949795064	1.17792156698173e-06
2610206C17Rik	-3.80719182836772	0.00207279844458603
2610318N02Rik	-5.25612594222525	1.06402975325214e-09
2700038G22Rik	-2.66688873969999	0.00228270084246905
2700081O15Rik	-5.31860830751021	4.14564565355853e-07
2810004N23Rik	-6.1977173329228	1.37087200855175e-06
2810006K23Rik	-1.95888672306897	0.0422072788470194
2810008D09Rik	-4.93716583844302	0.000232081111398815
2810013P06Rik	-4.79340657160502	6.83653538867553e-08
2810021J22Rik	-2.25597950108517	0.0230358093085055
2810403A07Rik	-1.35929992752269	0.0329815562647041
2810408M09Rik	-3.87714356701418	0.0131106003108721
2900097C17Rik	-2.18295951552617	0.0318196415278096
3110002H16Rik	-3.9240082059449	0.0044090520743076
4632415L05Rik	-1.42864879479765	0.0379570815160566
4831440E17Rik	-3.89086139850889	0.000327855686347511
4833417C18Rik	-2.08497095388784	0.0337787497164436
4833420G17Rik	-1.24086389865457	0.0269887431237239
4921531C22Rik	-3.4552479041039	0.000781329029594934
4930413G21Rik	-9.50021088479063	2.48518994569903e-06
4930427A07Rik	-4.98695137381554	1.11559582142886e-07
4930430J02Rik	-8.02659803765849	2.05114198481523e-15
4930444P10Rik	-4.00307036952461	0.000618937176836074
4930447C04Rik	-3.45451817312624	0.00103063229937043
4930500L23Rik	-5.15319632457264	1.46885197554147e-05
4930519F09Rik	-1.12500559603895	0.0404459231648395
4930563E22Rik	-3.64456921213703	0.0102746747991424
4931409K22Rik	-4.21003146816691	0.00151847719436782
4932414J04Rik	-2.54913100650968	0.0489112542360145
4932415M13Rik	-2.66711932303658	0.0149387167275842
4933404O12Rik	-2.96277637871459	0.00235579726336167
4933406J08Rik	-2.09183369718047	0.0165332834540282
4933409K07Rik	-1.57361877996892	0.0048773941607982
4933426M11Rik	-5.60396384380553	5.55305071505254e-15
4933430I17Rik	-3.47870020896209	0.00876292675147442
4933430M04Rik	-6.86615432534146	8.4745339959387e-07
5031439G07Rik	-1.48233935697054	0.0125507171053389
5730409E04Rik	-3.58154307043409	0.0216382495495522
5730455P16Rik	-3.46976530018843	3.39413000034885e-05
5830417I10Rik	-2.05229090896754	0.00207215449109741
6030407O03Rik	-7.41132158382462	0.00132813124592442
6430548M08Rik	-1.89727958151417	0.00206270753871927
6430550D23Rik	-5.33967071838837	1.81836024666011e-05
6430573F11Rik	-2.72456677572379	0.0350865873085394
9130401M01Rik	-3.55309676418552	1.81755427579015e-05
9330159M07Rik	-3.28647480334178	9.09521510885272e-05
9430008C03Rik	-2.12756216438837	0.0141749149048687
9430016H08Rik	-4.4734410711842	3.66084463025741e-05
9430038I01Rik	-1.61076906247187	0.00453079345109703
9430091E24Rik	-2.41445300745861	0.049103166070279
9530082P21Rik	-3.57698839560245	0.00019410762544157
9630033F20Rik	-2.91738344990241	2.249450510811e-07
9930012K11Rik	-3.651555135564	0.000246907903491222
9930021J03Rik	-3.60968014086466	0.0266742733182795
9930104L06Rik	-4.89717455305714	1.44070191962754e-08
A230046K03Rik	-1.52171939187765	0.0141441315013094
A230072C01Rik	-1.48965403234094	0.0194130079692878
A430078G23Rik	-1.39596260856281	0.0339336964121632
A530032D15Rik	-1.52202644394917	0.00240288537556665
A530064D06Rik	-2.22958653347877	0.019919281454112
A630020A06	-2.07084906957643	0.0141690645455101
A630066F11Rik	-4.30694806790304	0.00129654586284049
A630072M18Rik	-3.59544227047676	0.000200811701340207
A630075F10Rik	-1.40242220506405	0.0487352644092095
A830080D01Rik	-6.14528585161853	0.000468039385223767
AA414768	-2.02046438852265	0.00950272679392904
AA415398	-1.92828492267673	0.00363334286907847
AA543186	-3.2660939158805	0.0345774660903206
AF067061	-2.45639963211295	0.00805357555482771
AF067063	-4.49691163218982	2.56486044157916e-08
AI427809	-3.05800560812497	0.00854216856731275
AI464131	-1.94200345782505	0.00434583049996921
AI506816	-1.61159776876221	0.0425633245165709
AI661453	-8.6556345801679	1.42129283973234e-20
AI854703	-1.81131279759731	0.00399814825090145
AK010878	-3.83540296522852	2.50844253570404e-08
AU015228	-4.40505173715235	7.46950369165976e-13
AU018829	-1.61391262348185	0.00403024581761548
AU019823	-4.04858672434157	0.0023190220521279
AU019990	-2.05809558516182	0.0273276304590217
AV320801	-5.64895725479006	4.10834563294156e-07
AW011738	-2.48161056033718	0.0296701461518225
AW209491	-3.67945289204899	0.0028162438093984
AY761184	-2.94307464104485	0.0275864240238053
Aacs	-5.11134440701982	5.6488923072537e-06
Aard	-4.83776239369787	0.00237530333232908
Aars	-2.95818080404345	7.33528320516557e-07
Aasdhppt	-2.7106082195993	0.00539323071437687
Abcb10	-3.85696071140016	0.00474373929400315
Abce1	-2.64490939541847	0.0117873922308387
Abcf1	-3.21832030511029	2.15327494797627e-07
Abcf2	-1.95273076862506	0.000608726571485007
Abcg4	-Inf	0.000314038926950971
Abhd14b	-3.16585096241541	0.0163165775534668
Abhd6	-3.14050793102708	7.69846953214525e-08
Abtb2	-1.70807525922291	0.0153325456034005
Acad9	-2.02940823246287	0.048582823617095
Acap3	-3.90401844075044	0.00458974880541294
Acly	-1.62558769904015	0.00479372961836714
Acsl4	-1.85233749280065	0.000617421046131768
Actn1	-2.87022691829729	0.000515846131613453
Actn2	-2.25505752912319	0.0240502782711572
Actr5	-6.3838791689733	6.09627167474127e-05
Actr6	-5.81165621564366	0.00048344010683137
Acvr2a	-1.7864092985899	0.0444349239643793
Acy3	-2.08427874288317	0.010364138163568
Acyp1	-2.29458327844343	0.0232004753534056
Adat3	-5.26740821466541	0.000402381012090869
Adi1	-3.76579279964127	1.13483216272921e-07
Adipor1	-1.62215200633946	0.018954228937586
Adnp	-4.20973491921518	5.45837471568335e-10
Adnp2	-3.76961189020076	1.5230293737758e-07
Adrm1	-2.67786680197597	0.000319997708234753
Adsl	-3.66487578527286	1.87226628355329e-08
Aen	-1.72330071168066	0.00915022307820161
Aff1	-2.51534834214971	9.20112502091763e-06
Aff4	-2.53259942919833	6.5110650008667e-05
Afmid	-2.29410005126971	0.00351619433517056
Agmat	-9.28623583989227	6.47721959516283e-12
Ago2	-2.18623913524256	0.00539159340279087
Agpat2	-3.66749500304649	0.00142158249780482
Agpat5	-2.18114423250193	0.000111869083794934
Agpat9	-3.85743293136506	0.000275637451216388
Aif1l	-7.69375794721437	5.18855702486459e-05
Aifm1	-1.46425189392109	0.0274867731499385
Aimp2	-3.19269263680552	0.000242542349373119
Ajuba	-5.01611845667927	4.51416375831805e-11
Ak6	-2.05184335635649	0.00235047169362368
Akap8	-3.19906531610448	1.55778473440935e-08
Akirin1	-2.44902124819698	0.00520686820077863
Akr7a5	-4.27277194299911	0.00371777758040434
Alg11	-2.35300562451094	0.0161357500997793
Alg5	-2.98527884514847	0.00241187483397288
Alkbh1	-1.90011548193321	0.0305259206418868
Alkbh4	-2.88512197529013	0.0105197475547431
Alox12	-2.02073212186223	0.00475239327709449
Alppl2	-6.39192390337963	4.21679064461577e-15
Als2	-1.67432080023266	0.00920215565090379
Alx4	-3.11993369052693	7.3373458695588e-05
Alyref	-3.18449345572296	0.0492411745158581
Amhr2	-7.30155118341106	3.16092152580226e-06
Amot	-2.78072991924806	0.000118827281431477
Amz1	-5.31807278627213	0.000683069897907182
Anapc11	-1.58004423248705	0.0284570560370031
Anapc7	-2.95576374827898	4.02990545192512e-05
Ankhd1	-3.04360832906547	0.00131563049607203
Ankrd10	-4.4898791905945	3.33499591441229e-13
Ankrd13c	-1.45452605802987	0.0131106003108721
Ankrd22	-1.51566192459189	0.027439896335799
Ankrd35	-8.03188338881389	0.000169141442753336
Ankrd37	-1.54204257794668	0.00835714778160956
Ankrd54	-3.12308264727141	0.00020966304941442
Anks1	-2.59598039959401	0.0320266279415991
Antxr1	-3.11598089620634	6.0447452564689e-07
Ap1m1	-1.69600189046832	0.0248382114215898
Ap2a2	-3.26816972468382	0.00012702921871218
Ap3d1	-1.34371218584431	0.0166718426698073
Ap4e1	-2.4906743688015	0.000709152272209218
Ap4m1	-4.11179844145105	0.000886199790526817
Ap4s1	-3.18336003794883	6.09627167474127e-05
Ap5z1	-2.36500266709191	0.0436889122535151
Apc2	-9.67766837873729	3.49027650445739e-08
Apmap	-3.67564711199512	1.30411643227856e-06
Apoc1	-Inf	2.42610326785275e-05
Apol7b	-1.89514045792173	0.000260098393725265
Apol7e	-1.91259364224807	0.000358266547970787
Apom	-6.91951947510978	7.42676783276802e-12
Appbp2	-2.00950180628954	0.000943355676627102
Aprt	-4.90209935848609	5.18519856118273e-08
Aqp11	-5.10072633774362	1.21278238744731e-14
Aqp9	-1.4771074896177	0.00785362448256866
Araf	-1.70701957917195	0.0364840551696422
Arf2	-3.2681627955238	2.97449026383518e-08
Arf4	-3.2856078881583	8.5517797220837e-07
Arf6	-1.64782602719594	0.00778784363122834
Arfrp1	-4.87124520260242	1.15624633115031e-11
Arglu1	-2.02216694401387	0.00120983923977079
Arhgap1	-1.55145645629606	0.0125002646634634
Arhgap11a	-1.37749869705773	0.0300629436310943
Arhgap19	-1.62725594428163	0.0270236766686756
Arhgap8	-5.11689427597261	1.73695260823782e-07
Arhgef2	-3.61759424404124	0.00588090943725649
Arid4b	-2.91339062769227	4.95928916980706e-05
Arid5a	-4.69330729235814	0.000606161320731739
Arih2	-3.68622289683929	6.04454390320883e-08
Arl14ep	-2.37161466497519	0.0018176371838604
Arl16	-3.97486344090986	3.54655570857952e-05
Arl4a	-1.36072134630906	0.019442718294087
Arl4d	-3.16944403427267	0.0102601157488473
Arl5b	-2.19620650527232	0.0186508032073636
Arl6ip4	-2.98816713888289	0.0480776525000631
Arl6ip6	-2.85497038994474	0.000415516902379672
Arl8b	-1.41996753496137	0.022100021568343
Armc12	-4.35789958408536	0.00169154171103405
Armc6	-6.09717089217948	8.07578899714934e-05
Armc7	-4.84950052535098	4.70971933732541e-08
Arpc1a	-3.83459991688894	1.11464229960569e-09
Arrdc4	-2.55444734185476	0.000815997245550473
Arv1	-5.09262988119179	0.000160892923033433
Asb13	-2.57807042606398	0.00670967806495551
Aspn	-5.82252688074761	0.00265390270360411
Aste1	-2.66145657453047	0.000294473844056044
Asun	-1.52897415628194	0.0193040906281109
Atad2	-4.19760616668021	5.62430778237268e-09
Atad5	-2.07409566415567	0.00387635484273926
Atf7ip	-1.42374225476774	0.0178936407996485
Atf7ip2	-5.19560450392591	3.91558373984292e-13
Atg13	-2.7496788352765	0.000306482974706478
Atg14	-1.92966349071473	0.0019275090040925
Atg9a	-1.5900937219638	0.0226395043212458
Atl3	-3.44622259209559	8.37278860030497e-08
Atp1b2	-5.67956382716976	0.000296040200118329
Atp5e	-2.18705649512325	0.0340220537298352
Atp5f1	-1.51176710261582	0.00925364728184823
Atp5g1	-3.36674041200727	1.7434150490972e-07
Atp5h	-3.05734750315105	1.76605004717472e-06
Atp5j	-2.27396560615603	0.0127374097716006
Atp5o	-3.88602671582746	1.06639130745765e-08
Atp5s	-2.87108373043752	0.000405075914643916
Atp6ap2	-1.67826217142103	0.027256429115427
Atp6v0e	-2.30304402012869	0.000248366921430027
Atp6v1c2	-2.24998243314034	0.0128180073988058
Atp7a	-1.73124541229871	0.0381730601601956
Atp8b1	-3.96100984540246	0.0412650259351944
Atpaf2	-1.70852706027304	0.0321520532832482
Atpif1	-2.42199694743759	0.01215558946567
Atraid	-2.33370652759842	5.30290763510618e-05
Atrip	-3.80704318946718	0.0160650614373809
Atrnl1	-2.15611583898061	0.00138623404067669
Atxn3	-2.02605753555824	0.00434110496899905
Atxn7l3	-7.64885387647649	0.000181196689426499
Atxn7l3b	-4.29484831411644	2.76762410083682e-05
Aurkaip1	-2.23812478086587	0.00729283186579731
Aurkb	-2.87693226647778	4.26654406194754e-06
Avpi1	-2.21460887901222	0.0123212963209561
B020004C17Rik	-4.41889858332426	1.67281161104503e-13
B020031M17Rik	-2.72923808288066	0.0243916291154166
B230219D22Rik	-2.27412117689841	7.15872129558518e-05
B3galt6	-7.2883185321398	6.80223696554718e-20
B3gnt2	-2.55372440012802	0.000718224668844245
B4galnt2	-3.32618754904474	1.0584501717458e-06
B4galt3	-4.53892637227964	1.96490420984106e-10
B4galt5	-1.56568686740245	0.0407275383684072
BC003965	-5.15498276687144	4.42191639863378e-07
BC005537	-3.15126947010618	9.61980964204237e-06
BC027231	-3.60704744221125	3.30402082108855e-08
BC030867	-1.30644810079002	0.0251346266289828
BC031361	-4.59359844048683	0.000359184106596167
BC033916	-5.37653807383042	3.50644341902853e-16
BC037704	-10.9161207731603	0.00113975367076581
BC049762	-Inf	1.02983870766333e-07
BC052688	-3.04003603541445	1.94903551110298e-06
BC147527	-3.54502986591093	5.92745552098959e-05
Bach1	-3.44719977370783	6.36984133633393e-09
Bag1	-2.71715837767038	3.09784008103335e-05
Bag5	-5.77886703517289	4.90196744637759e-17
Bag6	-1.68699592914714	0.00631754396465679
Bambi	-3.15235766165971	3.40953660670012e-05
Baz1a	-2.47868323606689	0.00955633136000253
Bbc3	-3.96097237805657	0.0399769197766094
Bbs2	-2.40408296509716	0.000212709415835245
Bcap31	-2.42645303657768	4.97752465450087e-05
Bcar1	-2.31971616655159	0.00281733024935676
Bcdin3d	-4.54011595793166	0.0141127398322259
Bcl2l11	-1.26696768071395	0.0289839573116529
Bcl2l14	-6.06186526046266	0.00769115954421204
Bclaf1	-3.5562409429205	1.24513083742142e-09
Bcor	-4.93477731690623	5.21682338589396e-06
Bdp1	-2.93316471141984	0.000132158627406653
Bend3	-4.31948461812967	9.21166331989766e-11
Bex6	-2.6901979479945	0.00381698710384463
Bhlhb9	-3.01220853881978	0.0255809095012194
Bhmt	-3.096952747328	0.00633334293149665
Bhmt2	-5.07933822393581	0.000811359849147926
Bid	-4.2682420245788	1.08482029730803e-11
Birc2	-2.71321048547289	0.0089990366177887
Birc6	-1.73068010580613	0.00644572070212147
Bloc1s2	-3.1866602941575	0.000482343476213539
Bmf	-3.57458644258174	0.000570637926891131
Bnip3	-2.76072983788343	1.80123151155542e-06
Bok	-5.41422782970448	0.00733959221614474
Bola1	-5.07482234534884	6.87622695388734e-05
Bola2	-5.60972767421202	2.22536588470626e-05
Bop1	-4.38320156844739	3.59908231132521e-08
Brat1	-4.07470564649775	0.00740178273430935
Brd2	-1.83706918157384	0.00165422751776581
Brd8	-1.63235219066273	0.00510855351289215
Brf1	-2.26734250503297	0.0015428405188558
Bri3bp	-4.6321975006713	0.0052494949017072
Brms1	-2.70321060044538	0.00673618287615471
Brpf1	-3.05736489786868	0.000127915153113729
Brpf3	-2.29985261999742	9.68046060887945e-05
Btbd18	-4.91732166332962	4.1671445755607e-15
Btbd7	-4.07905653804815	1.65342492021319e-07
Btg1	-2.3852130782253	0.00675758603715929
Bud31	-2.01327770783994	0.0275287908835354
Bysl	-2.51672329715325	0.00773913586479917
Bzw1	-3.24108388890064	7.36845653667234e-09
C030006K11Rik	-4.88808064173675	0.00101411905918939
C030034I22Rik	-Inf	3.33662415560305e-05
C130026I21Rik	-1.55613105600505	0.0114669616954577
C130036L24Rik	-3.03922287481688	0.0283472006701251
C130074G19Rik	-2.98488943653387	0.0101257509796378
C1d	-3.07305684548292	0.00038593295047206
C1qbp	-1.34261489227253	0.0243927728705019
C1ql1	-4.47508508636105	0.00924323612306212
C230052I12Rik	-2.28575735485353	0.0334776788435516
C2cd2l	-6.40526861868423	1.3247735097969e-12
C330007P06Rik	-1.75681098939685	0.00524345356804984
C330021F23Rik	-3.11760386304098	5.7497832528371e-06
Caap1	-7.72240609777472	3.34499079816982e-13
Cab39	-1.96005053814836	0.000280997162984126
Cables1	-3.26706718092796	0.0342148026987786
Cactin	-3.49892114256661	0.00441156578726549
Cacybp	-5.11049263933044	4.30472091813536e-12
Cad	-6.21921746237558	3.60458561309712e-07
Cadm1	-4.01627874459455	6.04077632041238e-05
Calcoco2	-5.46239883483989	3.88972718506825e-08
Calm2	-3.36723865246738	1.71905206932243e-05
Calm3	-3.55607290733517	8.89911337555882e-05
Calr	-2.00320506645581	0.000351042028519176
Camk2d	-7.13560095085987	6.24023189276199e-05
Caml	-2.84053343220679	6.18984805572752e-06
Caprin2	-1.19465563711582	0.0276710646565184
Carkd	-2.89387283902296	0.0150285168041402
Cars2	-4.53010730534141	3.18279293393681e-05
Casc3	-3.85841452360896	3.64520155882855e-08
Casc4	-1.64381991782807	0.00339923576291303
Caskin1	-5.24967184377556	0.00442455682914998
Casp3	-3.26224270662764	2.11672150848567e-05
Catsperg1	-6.07393482427903	2.59289817206856e-11
Catsperg2	-Inf	0.000111573665983109
Cbll1	-3.17505570326261	0.000296850567867136
Cbln1	-2.9070657990229	0.00491376600482896
Cbwd1	-4.61587284661005	3.88972718506825e-08
Cbx3	-3.81764075294872	7.51729624096913e-10
Cbx4	-2.62258967657424	0.0219156526509598
Cbx8	-7.4529741164414	2.21141264830168e-08
Cby1	-2.05273873156233	0.0158881854212998
Ccar1	-2.17467884002198	0.00241405795326343
Ccdc116	-3.58201679523257	0.0205465898658071
Ccdc126	-5.56380247987921	1.37817085136825e-07
Ccdc134	-4.69841083811804	1.89282297394541e-08
Ccdc137	-5.48151186381481	3.33499591441229e-13
Ccdc166	-6.24449730056648	0.00326355055059725
Ccdc25	-2.32207647549669	0.000267733892918019
Ccdc32	-3.03686529966581	0.0195964902773211
Ccdc51	-7.76598923296389	4.50522243368597e-05
Ccdc57	-3.42887942808803	0.0202625367464298
Ccdc59	-3.61163595875565	3.80420793111855e-08
Ccdc63	-2.802281164365	0.00336724537179587
Ccdc77	-1.53837911202194	0.0295984055741203
Ccdc86	-2.20543550471759	0.00127886999238215
Ccdc9	-2.71956568271108	0.00164560679026074
Cchcr1	-7.32151967237428	7.10561034101887e-06
Ccnb1ip1	-3.08483315549209	0.0230204188539488
Ccne1	-4.56800137847395	2.98221944082126e-12
Ccnf	-1.80882708691129	0.00275760829223021
Ccnjl	-4.42802579630209	0.00159431415743737
Ccnt2	-1.73141858492635	0.00652426517622418
Ccnyl1	-2.55973612570225	1.40611760482484e-05
Ccpg1os	-2.1704200831693	0.0130663278500536
Ccs	-4.52154077104286	0.00184456568081787
Cct3	-2.3714273318338	5.56586493986801e-05
Cct4	-2.59642889326893	1.99580998790884e-05
Cct6a	-5.14120552984873	6.52244389746593e-15
Cct6b	-4.34673711785876	0.000448670304658518
Cct8l1	-5.16040756394315	0.000997463791802744
Cd209c	-1.04479341837371	0.0471504040959769
Cd320	-2.06663406460653	0.00114264558703953
Cd3eap	-4.76349923287734	9.43915439937591e-06
Cd63	-3.77822327292709	2.04434459531402e-09
Cdan1	-6.19084484302801	4.73161896989021e-16
Cdc20	-1.57256178482654	0.00569813132154994
Cdc25c	-4.74408875052921	0.000151363164293345
Cdc27	-1.18041181564724	0.0411758680838947
Cdc42ep4	-3.25113789184627	0.000858764026808436
Cdc5l	-2.92172619788071	3.23805580244515e-07
Cdca2	-2.3821484572546	0.00171432256600761
Cdk1	-3.91701641769031	3.88095008946981e-10
Cdk19	-1.62472431777074	0.00771082557641913
Cdk2ap1	-2.6146060477198	1.82885359492332e-06
Cdk5r1	-2.08186272844331	0.027028684799712
Cdk5rap3	-4.25976260811303	2.8004735714968e-06
Cdk9	-3.61653595970541	2.28499348950438e-09
Cdkl4	-2.30007025105102	0.00945855375902547
Cdkn1c	-2.56942210771003	0.0015648484006562
Cdkn2aip	-2.12783158620918	0.0490701623546363
Cdkn2d	-2.33837923800652	0.00539332780990521
Cdkn3	-7.34330382511503	1.08975116597822e-13
Cdsn	-9.54198018476959	2.91169762770831e-08
Cebpz	-1.52295701350711	0.0395620929131207
Cenpi	-2.10361688316433	0.00539159340279087
Cenpl	-2.53916229533909	0.00271002542286366
Cenpm	-5.25648530757134	5.68410207022017e-07
Cenpt	-5.47527485278423	1.59359115717122e-12
Cep250	-2.84014676360613	0.00513228102629929
Cep57	-1.94449660877613	0.00121900173234709
Cep89	-2.81037714194872	0.0106453313293716
Cep97	-2.5649667898842	0.0158881625413786
Cercam	-3.24419621349786	0.0253279606297149
Cfap20	-1.09786208445288	0.0327011158309826
Cggbp1	-3.29795985134554	1.72314124124565e-09
Chchd10	-3.70633244486501	0.00297906388230211
Chchd2	-3.15708808527007	1.84987388053183e-07
Chchd4	-6.24779772571568	3.0338507086175e-05
Chd1	-2.3823638242837	0.000214000991850124
Chek2	-2.67114960326044	9.2932107488151e-05
Chgb	-8.7752877969348	1.55525896352297e-05
Chit1	-1.80720845222933	0.0372501836430202
Chka	-3.6532164927413	5.22145897840599e-08
Chml	-2.22648006920344	0.00834773065528822
Chmp1b	-3.16856221064594	0.000212672018254233
Chmp2a	-1.84889435948249	0.0209934336832443
Chmp6	-3.20625821624414	0.0416568683813681
Chrac1	-3.17408480252526	0.00495405787797593
Chrm3	-2.85925263712069	0.000924994143108475
Chrna10	-8.20636999747507	5.18036167289167e-05
Chst12	-5.6167300916099	1.4423568829793e-05
Chst8	-3.34893091168979	0.0404719026602674
Chtf8	-3.78616538591309	0.00198343361940864
Chtop	-1.5625599462993	0.00305889532425931
Chuk	-1.76743808106871	0.0481590080688232
Ciart	-3.64550453191671	0.000123997464641972
Cinp	-2.39108537307706	0.0021487357306952
Cirh1a	-1.80705222220845	0.000805969232612068
Ckap2l	-2.7677622056352	9.54175318098229e-06
Ckb	-2.31488031198722	0.00697887499742008
Clcn7	-3.45522534710252	0.00392888411166386
Cldn6	-2.23743400485357	0.0236884935360301
Clk4	-3.00154954017729	0.000339207892178144
Clns1a	-1.57882449303546	0.0233128005849039
Clp1	-3.91391507850639	4.66780226119734e-09
Clpp	-3.91174056313142	2.32510289654645e-08
Clpx	-3.25713915885469	2.56486044157916e-08
Clta	-1.89006776616181	0.00104446241328957
Cltc	-1.21258748289134	0.0476344580384324
Cmss1	-1.95079765006976	0.0420547910375384
Cmtm4	-3.85998168551507	1.72487017858496e-09
Cmtr1	-2.27021916956046	0.000348910784691058
Cnbp	-1.2421342464149	0.0303467474586006
Cnih4	-2.30909941872566	0.00401346071975994
Cnnm2	-2.2609865248414	0.00363450692225669
Cnnm3	-5.88956884322509	3.77973374079879e-11
Cnnm4	-3.27103557614928	9.20112502091763e-06
Cnot1	-1.28728056361238	0.0258881876563336
Cnot10	-2.55422005125234	0.00192919908628271
Coa6	-3.99614471834739	0.00217030002734867
Coa7	-4.6531891160773	2.75785266026627e-06
Cog2	-5.80020039920781	1.55548920571389e-05
Cog7	-1.91017145601608	0.0280480967170443
Coil	-3.27813865699204	0.00124463245455297
Colgalt2	-2.83244070045929	5.07776513550241e-05
Commd4	-3.19599119791423	0.0338545165978698
Commd5	-4.47312209262476	1.27334097785716e-06
Commd7	-3.29753949960219	6.0447452564689e-07
Cops6	-2.85484544758472	2.62922502523036e-05
Cops7a	-2.082482364231	0.000521564747178521
Coq3	-2.42837305222744	0.000931809066256989
Coq4	-4.77330367350261	8.17417077447568e-10
Cotl1	-2.1547430906209	0.018954228937586
Cox11	-2.68303053270972	0.00354654003340957
Cox17	-3.98346574546522	0.0276710646565184
Cox4i1	-3.02741139920588	9.49043077176649e-07
Cox6a1	-1.9456784053962	0.00741645568782075
Cpd	-1.66125067429494	0.0191602330761073
Cpeb2	-1.8821503309709	0.0301983152637399
Cpne1	-2.21922570972918	0.00144292029542093
Cpsf3l	-4.42018392590544	3.72551602815057e-09
Cpsf6	-2.02918934376706	0.000266675767986564
Cpt2	-3.14380224203506	1.64184700128304e-05
Cramp1l	-2.33118638327144	0.00126938418697961
Crcp	-2.03276839659097	0.00147434611317615
Creb1	-4.21506943502464	8.22049213957139e-07
Crebl2	-8.25394859930885	9.79802365224248e-13
Crebrf	-1.95235797929585	0.00132813124592442
Crebzf	-2.22224798216	0.00826319980980013
Crem	-3.59562081904059	0.000197604202725727
Crkl	-1.23509947081126	0.0414785229506051
Crlf3	-1.60813794229163	0.00594875166436663
Crtap	-3.7863196115481	3.07106902319959e-06
Crxos	-6.31945675342893	4.20370483681218e-22
Cry2	-2.99359339478131	0.0265336741082924
Cse1l	-2.67466980012265	1.28314767089863e-05
Csf2rb2	-1.80176734757172	0.0458100888176125
Csgalnact2	-3.72916394520457	0.0083068532705296
Cspp1	-2.73727624068082	0.0104408912671684
Csrnp1	-1.95089872806451	0.0315086077860216
Cst7	-3.03313806508247	0.00128995463724312
Cstf1	-4.90999691229184	3.36360106517235e-06
Cstf2t	-6.2273325025336	5.36574033742199e-18
Cstf3	-1.57530315564053	0.00650945154604423
Ctc1	-2.04989578341545	0.0146485662959111
Ctdnep1	-2.38251055327011	0.00141182003684496
Ctdsp2	-1.67637966185013	0.0200368570893764
Ctf1	-3.78197587137026	0.00237847631876227
Ctf2	-5.99056037531953	0.00488893522190293
Ctnnbl1	-1.90235430264026	0.00871967922581182
Ctsa	-3.4220934325192	7.94161677810295e-07
Ctsb	-1.2975524984493	0.0436338902211848
Ctsc	-3.35444675312526	1.06052105893921e-05
Ctsl	-3.43246604841737	5.39359375021148e-07
Cttnbp2	-4.98284422330531	0.00557708310729461
Ctu1	-3.71864523008742	0.0048929440854067
Ctu2	-8.46861848920642	0.000230707133360483
Cuedc2	-2.28666982793628	0.0479277730189106
Cul3	-3.21145510236687	3.23532540058328e-08
Cwc25	-2.04617250335375	0.00904078955814675
Cxadr	-3.61771641028462	7.41054559816913e-05
Cxcl16	-2.21163436468291	0.0481071583569895
Cyc1	-3.74125696577976	7.58987199857427e-07
Cyp51	-2.71912815458921	0.00207852256320631
Cyth2	-3.63439942742559	2.41362922723383e-06
D030056L22Rik	-3.05795404497554	1.35560823921927e-06
D11Wsu47e	-2.50961041528036	0.0124433195560501
D130020L05Rik	-2.18124286632295	0.0194929265083867
D16Ertd472e	-3.5359641655669	4.06937567172673e-08
D19Bwg1357e	-3.70622276837484	8.500002635407e-09
D1Pas1	-4.07159898884122	4.0527819329723e-08
D230025D16Rik	-3.03455672802674	4.54625937931285e-05
D2Wsu81e	-2.0215939417393	0.0286237591181713
D2hgdh	-5.25449549868677	0.048582823617095
D5Ertd577e	-2.31619379141346	0.000852046880902565
D5Ertd605e	-3.16333849468128	0.00199995159072239
D7Ertd143e	-7.79549018826151	7.78717466428184e-06
D8Ertd738e	-1.53284828882981	0.0243100635932087
Dag1	-1.69481008673912	0.00557222757578406
Dagla	-5.75784792396365	6.75313592122022e-05
Dancr	-3.95555202669039	5.96113380376772e-05
Dars2	-4.2541186570123	4.94359469033215e-07
Dbhos	-1.38241405952941	0.012086418021839
Dbnl	-1.98550623184918	0.0116322390983806
Dbr1	-1.86776061106722	0.00335815640066937
Dbt	-3.09781748827495	0.000468074344882907
Dcaf10	-2.28748811119692	0.000375468969921127
Dcaf13	-1.717399870572	0.00407788084723782
Dcbld1	-1.55524196807946	0.0163833832953038
Dck	-3.47890662224074	0.0165332834540282
Dclre1b	-1.23967437569432	0.0476960254214988
Dcun1d3	-3.08093726388191	2.19922838659517e-05
Ddhd2	-1.79064626714224	0.00492953832258356
Ddit4l	-3.22987677144584	0.0255379077815027
Ddr2	-2.51048768580078	5.22841278451519e-05
Ddt	-2.20660002550373	0.0120041642104445
Ddx10	-3.48658767248342	0.00393752708398795
Ddx20	-5.52118336502318	7.25848548025594e-14
Ddx21	-3.24325904914515	2.99157618765763e-07
Ddx24	-1.73809806312263	0.00684405649290451
Ddx26b	-3.45996953979874	0.00575085088764745
Ddx27	-4.74051418541655	3.4009649029915e-13
Ddx31	-4.6205344626133	4.12528023324865e-07
Ddx39	-3.71460892437827	4.13681121820705e-11
Ddx39b	-2.97534576514465	0.00288727965413843
Ddx42	-1.68667150506745	0.0333218646764851
Ddx43	-2.47349950900157	0.0172495341554199
Ddx47	-2.89729068751739	0.000824489908362576
Ddx5	-2.03996723013242	0.000168762039763885
Ddx50	-1.67673750557528	0.023702169034826
Ddx51	-1.61201411091235	0.00544640729021649
Ddx52	-2.91062468906454	8.66297039987103e-06
Ddx54	-5.06187709708143	3.106035627693e-08
Ddx55	-3.85852884482179	5.00506348409829e-05
Ddx56	-2.30062900449416	0.000569883800878824
Deb1	-1.2496027385766	0.0333218646764851
Decr1	-4.44537421664454	0.00994558177689935
Decr2	-3.17777833914522	1.02035269246682e-05
Dedd2	-7.07982982017161	8.00552869382595e-17
Def8	-2.62532666076101	0.000101049527943607
Defb25	-2.74232864598538	0.0394346757978681
Denr	-2.82032268691736	2.15596753840166e-06
Depdc1a	-2.92370440956052	0.0178215966394483
Dexi	-3.10391637631419	0.00173028780574731
Dffa	-2.91928608142754	6.71364010979778e-05
Dgat1	-3.13548839182607	0.0201399946693025
Dgcr2	-1.55784477846104	0.0267665996974034
Dgka	-2.50219331974734	0.033760566465464
Dgke	-3.8657371016914	4.33074739282323e-10
Dhdds	-1.86198173669136	0.0277459374756387
Dhfr	-1.98905554598106	0.00507217537560184
Dhps	-3.4345904955029	0.00152484154047052
Dhrs7b	-4.15447338568143	0.0149290782270031
Dhx33	-3.34300360707325	8.4745339959387e-07
Dhx8	-3.14064398897692	3.09741328556176e-06
Dhx9	-3.19030776730016	1.95169804422101e-07
Diap3	-3.25635388804472	4.05495939836326e-05
Dido1	-2.85394104204139	1.44698005545441e-05
Dimt1	-2.87253904633492	3.02477845059532e-06
Dis3	-3.08009646082946	3.66413495080322e-05
Dkkl1	-5.4057661019831	0.00482759954127445
Dmgdh	-5.22827311696924	8.55539821508536e-05
Dnaaf1	-6.36536144298288	0.000133409471406503
Dnaaf2	-1.96887974362957	0.0489553936262637
Dnajb11	-2.05208411057226	0.00778097160425513
Dnajb14	-1.36522403543125	0.0163153336823484
Dnajb9	-3.35203224546261	1.12569499495014e-08
Dnajc12	-6.20996109663341	2.97154766139172e-10
Dnajc15	-2.35223717954868	0.0265809093413319
Dnajc16	-3.58981588715441	0.0033109582408998
Dnajc25	-4.9670820418382	0.00875709300860537
Dnajc30	-5.0828240842963	2.33169406607485e-10
Dnajc4	-2.48836749065126	0.0414304241442754
Dner	-3.55320681132995	0.000424408589148164
Dnttip2	-1.7165299214788	0.0057964046946345
Dolk	-4.8851675266834	8.64936930800566e-11
Dolpp1	-8.05717233839966	7.08165450168812e-07
Dopey1	-1.79459622157431	0.0340018499102959
Dos	-1.70692459680822	0.0389586835220242
Dpagt1	-2.44324350470027	0.00606089096965402
Dpf2	-3.26240802507471	1.46644407153062e-06
Dph2	-5.50411641711511	1.33544844111615e-09
Dpm1	-3.16796069513355	5.08056663314725e-06
Dpp7	-4.24683606628428	1.59913660907202e-05
Dpp9	-4.83844414909665	0.00358085382388262
Dppa2	-2.78379348610279	4.19661966804186e-06
Dppa4	-4.20127213181762	2.06222735007796e-12
Dr1	-2.67759619988005	2.62171317948406e-06
Drg1	-3.70651601936191	3.74895896037845e-09
Dscr3	-2.41392455347294	0.00246542306962592
Dst	-1.15543220850709	0.03760326509192
Dus1l	-2.08062700940623	0.00507419068157162
Dus2	-2.03264974484363	0.00482506915289331
Dus3l	-2.2156808581358	0.0440332255593246
Dusp4	-4.51491073572036	0.00917244938515476
Dusp9	-5.85798116082995	5.9885556073121e-08
Dvl1	-3.36312241431213	0.00208478828297515
Dxo	-3.45537958076342	1.35351134571746e-05
Dync1h1	-3.33668236631003	0.000276456804476845
Dynll1	-1.7578061028249	0.00149951108271295
Dyrk3	-1.64890510278454	0.0494384667003571
E030024N20Rik	-1.83721764948835	0.00209191045463366
E030030I06Rik	-1.20787567302096	0.0329599943357893
E130012A19Rik	-4.86533811524619	0.012372485116393
E130309D02Rik	-5.16229726011326	5.75127742679948e-13
E2f7	-6.90991106852502	2.95435119525148e-16
E2f8	-2.30648049335902	0.0112767456982216
E4f1	-2.7783004460082	0.000420909198712749
EU599041	-5.21273607328719	1.11932772141516e-05
Eaf1	-3.05321564229124	6.51580040918938e-07
Eapp	-2.43174091389591	0.000477805764642181
Ears2	-4.37326219759075	6.81401988116656e-06
Ebna1bp2	-1.98279097934786	0.000401057548758641
Ece2	-2.74389895701284	0.00218314016866898
Eci1	-6.63507626528644	2.80435602723909e-17
Ecsit	-3.19224524148644	0.000246548439792332
Eda	-1.73623491324329	0.0370895695144539
Edf1	-3.96574863127237	0.00125424438387174
Eef1d	-3.0648003814069	3.38230077428861e-06
Eef2	-1.60554017333198	0.00655303220619675
Efcab12	-1.9067998874102	0.0157782338928712
Efnb2	-1.43801291018975	0.0273305376929908
Egln2	-2.86617206274124	0.00371031337186494
Ehmt1	-1.93819706645527	0.0107843022544431
Ehmt2	-3.90312454623577	0.0147816883535271
Ei24	-3.22011805204817	9.66309497748222e-08
Eid2	-6.96155449945665	4.15176577380092e-22
Eid2b	-5.88208561751303	0.00209493468189585
Eif1a	-3.03746005062425	5.89709671823898e-07
Eif2a	-2.13434328708687	0.00417248585337437
Eif2ak3	-2.62945197648086	0.00876153474867663
Eif2b2	-2.38530538289118	0.00237638578308867
Eif2b4	-2.34996371310895	6.75313592122022e-05
Eif2b5	-3.53359908449691	1.49152087327214e-06
Eif2s1	-1.69156372942281	0.0132499723796537
Eif2s3x	-1.65504368133732	0.0132492883600328
Eif3a	-3.85727296108797	4.33074739282323e-10
Eif3b	-4.25001298386131	1.40542528291393e-10
Eif3c	-3.34680758326598	2.1135497539959e-07
Eif3f	-2.56880615228664	0.000129648618858578
Eif3g	-3.312897691138	0.00101440993542192
Eif3h	-1.68799232367154	0.00556891918198465
Eif3l	-2.27581264190617	0.015975943250631
Eif3m	-3.23874817413944	3.21473056179796e-05
Eif4a3	-2.74793164496798	1.39656544506891e-06
Eif4e	-1.40962052601898	0.0234771846777143
Eif4e2	-1.68913856106304	0.00163976477851791
Eif4ebp1	-2.24100293305275	0.0388775128826825
Eif4h	-3.74892527522651	6.42017017772893e-05
Eif5	-1.01167986961374	0.0411758680838947
Eif5a2	-3.19065085908788	0.0441267683112171
Eif6	-2.06280150872983	0.000236969835727507
Ell2	-3.37243497047527	2.15164210984662e-08
Ell3	-1.81430943016969	0.0244041377655266
Elmo2	-2.19828239218012	0.0263917994083559
Elovl3	-4.39769432100166	0.00643357570368208
Elovl6	-4.59908915892584	6.89470383554232e-09
Elp5	-1.32406237780025	0.0327011158309826
Elp6	-4.36051473806975	1.64126835667977e-07
Emc1	-3.74283203173811	7.02145558337308e-08
Emc3	-1.76827820152492	0.00453271135073718
Emc4	-3.69556853920312	3.84357120651306e-07
Eml3	-3.30459839512274	0.0135548007826655
Endod1	-5.02119226271354	2.16930032574076e-10
Endov	-3.091948446486	0.025238543505943
Enkd1	-3.86507416362091	0.0127304416244744
Entpd2	-3.14306139177578	0.0241818580095554
Entpd7	-5.21492517446026	3.52168307914696e-07
Ep300	-3.92594481840083	6.40862982202998e-11
Epc2	-1.7709881185666	0.0028490868563975
Epcam	-3.84449950285621	0.0454248778631128
Epg5	-1.49101456915602	0.0300013768093859
Ephb1	-4.66380649869489	5.05975432876273e-05
Ephb2	-3.06966271939476	0.00539159340279087
Ephb3	-4.01452417640428	0.00280329739395479
Epm2aip1	-2.28257665884761	0.033173713623174
Eqtn	-4.15582882405089	0.00990208594174189
Ercc1	-2.68318201327417	0.0115200302898463
Ercc3	-3.40567597870581	2.22536588470626e-05
Ercc6	-2.94495341774475	8.6080183273328e-06
Erdr1	-5.34425174484766	0.0222445600020512
Esco2	-1.68825961634491	0.0122921065586401
Esf1	-4.32062580210879	0.000741988362037073
Esyt3	-3.84884129581954	0.000389107691465477
Etf1	-1.93186247139306	0.000786432045129915
Etfb	-2.2559038912994	0.0286448403820056
Etnk1	-1.62454527249398	0.0126406915798128
Etv5	-1.6681092151894	0.0146245101269402
Eva1a	-3.46265613870105	0.00204514707858571
Exd2	-4.31801421586202	1.75004545027499e-08
Exoc8	-5.56169500670871	5.56745921770048e-14
Exosc1	-2.77504166307176	7.57979376642347e-06
Exosc10	-1.24276309335653	0.0365409185003023
Exosc2	-1.47394648615435	0.03253190877924
Exosc6	-4.80836374309415	9.64641790093972e-10
F11r	-2.85958913826204	6.65325286157985e-05
F2r	-6.65866130045163	2.03383084893779e-05
F9	-Inf	0.00190471202851147
Fabp3	-4.3124010455509	0.0234829185315276
Faf2	-7.74944151602873	4.05491589130409e-20
Fahd1	-3.40525942818443	0.00235452958392409
Fam109a	-7.62256304475469	5.6475349607907e-13
Fam110a	-Inf	0.000277848445804862
Fam118a	-1.50115518726201	0.00722728562793908
Fam134a	-2.86637658523632	3.08521741561871e-05
Fam134c	-2.70027125201212	0.0070054171487629
Fam136a	-4.20436523556419	7.61566719590301e-05
Fam13b	-4.22032357943584	0.00182298671173661
Fam161b	-2.04623692892231	0.00913893508364711
Fam168b	-2.027141680359	0.00246719336094885
Fam169b	-1.74786866554888	0.00259621294654536
Fam175b	-1.95570897276277	0.0122213066667913
Fam207a	-4.54195012888597	8.33301709066022e-06
Fam208a	-3.60939753153225	1.54784592713379e-07
Fam209	-3.46917371556498	0.025897483704685
Fam20b	-2.77370558984181	0.00302712089688194
Fam219a	-3.83687883192762	0.0381730601601956
Fam222a	-2.2172564843691	0.0407041769447265
Fam228b	-6.51446120606523	1.25725469798889e-08
Fam32a	-2.03930217609877	0.00165832069341557
Fam43a	-4.05412065085187	0.00125652309178143
Fam43b	-8.85828372580211	7.01100227187611e-08
Fam45a	-2.54600291058505	0.000151160672874868
Fam50a	-1.32258425257781	0.0279872628420801
Fam53a	-1.38368650599415	0.0457505328955855
Fam63b	-5.39950190993582	0.00081686023359571
Fam73a	-4.8678171844004	1.4532656416655e-07
Fam76a	-5.95747624741626	8.86425238644398e-17
Fam76b	-2.80502853008297	0.00639113337703119
Fam83d	-5.2690674306141	2.37141790774263e-05
Fam89b	-2.58419103996961	0.00404185061334484
Fam98b	-2.96625645051556	4.66590342331029e-07
Fancf	-6.26710403602716	6.83177506434706e-14
Fancm	-1.28011840306989	0.039316574811878
Far1	-3.16829680861049	4.80484389912505e-05
Fasn	-2.76743194911445	0.0047749282330487
Fastk	-3.60280667600888	0.0467647862955968
Fastkd5	-3.17282010169439	6.76352422165047e-06
Fau	-2.64217097059558	0.00208097362098978
Fbl	-3.93720566658787	1.02743328701026e-10
Fblim1	-3.05821138615843	0.0441426729280426
Fbrsl1	-3.42965357727181	0.00558388205400235
Fbxl12	-2.30639645297278	0.000372381681842765
Fbxl12os	-2.20854721296097	0.0192219104321399
Fbxl13	-4.30190722800525	0.00179020122921032
Fbxl8	-4.06606231019177	0.00986744964019663
Fbxo15	-1.73982693687464	0.00174566323707338
Fbxo16	-1.92785187636175	0.002875666067163
Fbxo30	-1.67665884350915	0.00496712530635967
Fbxo31	-4.46226913753766	0.00952140933893799
Fbxo33	-2.03467433875078	0.000484310742001577
Fbxo36	-1.3893196395874	0.0230204188539488
Fbxo45	-4.38211472660216	2.27223173173653e-12
Fbxo47	-4.71022110050976	0.00960787033200521
Fbxo5	-2.42713278105086	6.5596812622064e-05
Fbxo6	-4.76755974374034	8.92093327542821e-06
Fbxw2	-2.42344866294509	0.000226237586736736
Fbxw9	-3.88408706000812	3.53691118228131e-07
Fcf1	-1.66880773502264	0.0147410625449314
Fcgr3	-3.23822126339303	7.10391877359759e-08
Fdps	-3.33495028092394	8.35807536790897e-05
Fdxacb1	-5.21840462744639	0.00184545835709579
Fem1a	-4.13565902097842	3.26962518731475e-08
Fem1c	-4.41832177686833	2.34535684987438e-12
Fen1	-1.59954487040856	0.0228099945157125
Fgf4	-5.19966505540242	3.52417454287114e-11
Fgfr4	-8.40650500436522	5.83767472387361e-07
Fgfrl1	-7.35760031205923	8.48139173823618e-08
Ficd	-4.23383595210693	5.29373806265681e-10
Fkbp10	-7.20193759649786	0.00786418916701844
Fkbp3	-2.8677010354803	0.0244553757717346
Fkbp4	-4.40375956610426	7.66803846673594e-09
Flt3l	-4.95100585020113	9.58443593688046e-06
Flywch2	-Inf	0.000729599298794487
Fmr1	-1.41204402357452	0.0300956752583909
Fnip2	-2.38700469954517	0.0019984238317165
Folr1	-5.68842985993306	4.86299222739411e-06
Folr2	-2.44082180335853	0.0254913358661827
Foxr1	-2.26758493683123	0.00143614222975363
Foxred1	-3.0352749331568	0.00371234185880453
Frat1	-6.10290541622993	0.00108064612778207
Frrs1	-1.76253529518682	0.0422888407890094
Fscn1	-3.3655459890458	0.00522643869599635
Fthl17	-4.63229431166938	0.00264215945621764
Fto	-2.19688512479711	0.000723872840828505
Fubp1	-2.20822157725762	0.000422847037353143
Fubp3	-2.61751254821801	0.0014345935849559
Fxr1	-1.26753660314924	0.0322535112894129
Fyttd1	-4.01468438043774	2.88739012904179e-08
Fzd4	-2.93893715492391	0.0112735239712047
Fzd5	-6.96218634301549	6.95211507503663e-20
Fzd7	-4.05393181795422	0.00757221203960761
Fzd9	-8.1914382945014	9.90721003457636e-10
G2e3	-5.15353370504322	2.71926987363398e-11
G3bp1	-4.5766681125017	6.81386857771825e-14
Gab3	-3.38398357890586	0.0132397366960832
Gabarapl2	-2.70821139035594	3.69472021417315e-06
Gabpa	-6.10946689100892	1.08180958463845e-20
Gabpb2	-1.75244221737001	0.0353021323175929
Gadd45b	-6.63222618310797	4.12548718295903e-05
Gak	-2.10932446269871	0.000811359849147926
Gal3st2	-4.12001000852539	0.00293730191575617
Galnt11	-1.47142974750621	0.0365386186504835
Gamt	-5.46247104102893	0.00864618698384424
Gapvd1	-1.77085386540864	0.0311887145388375
Gart	-2.43117727821069	0.00530060884475811
Gata1	-7.14600836638633	2.15922301660872e-22
Gata4	-4.85863840389692	9.7770175705913e-14
Gatsl3	-1.80250073005356	0.0483426596048673
Gclc	-3.25224733265947	3.01510778216431e-07
Gcnt2	-1.65577004258318	0.0294898320735091
Gcsh	-4.09352337668776	9.05514928785249e-12
Gdf5	-3.16658053258157	0.00167561845421062
Gemin2	-4.7639320509509	1.27472111605797e-05
Gemin5	-4.695309172296	9.16447100378729e-12
Gfod2	-4.99518772225041	0.000387019574864116
Gfpt1	-1.76737148430842	0.0112375764988735
Gga1	-2.85018572964629	0.00269058911803723
Ggnbp2	-1.54144281237	0.024447545850883
Ggps1	-3.19414197471812	5.20263713898656e-05
Ggt6	-7.11700425723256	2.06027296924449e-07
Gins3	-3.8388067356939	0.00495405787797593
Gipc1	-3.51235192815661	0.0373855951518684
Gja1	-6.02338607510929	4.60526490776222e-07
Gla	-1.52924263174697	0.0420297050786521
Glce	-1.45772792137991	0.019576852552657
Gldc	-3.86229230316938	1.98988646525544e-10
Glg1	-4.72913289334578	0.0265809093413319
Gli1	-3.34631626891186	0.0253074971015077
Gli3	-5.49647960239385	0.000895765072715542
Glis2	-4.78382871351703	9.27087893202155e-07
Glod5	-9.02362435325506	2.41982596390404e-12
Glrx3	-3.56352214900883	6.09627167474127e-05
Glrx5	-2.21676769600579	0.017511222494883
Gls	-3.82365243222381	1.39363290049037e-09
Gls2	-2.74950802675425	0.00150000121596178
Glt25d1	-2.95267555417937	0.00021854016403963
Gltp	-2.11583713930107	0.000318143905991608
Gltscr1l	-1.67985839285167	0.00557708310729461
Gltscr2	-4.64880119454189	5.03761268810593e-05
Glul	-3.45137904394223	8.74347397717605e-09
Glyr1	-2.1596461963515	0.000492425407704958
Gm10536	-5.64150482350323	0.0179037052911452
Gm10696	-3.11983085939723	3.23499745008904e-05
Gm10778	-2.06209797432331	0.0112375764988735
Gm10789	-1.88710131823523	0.0361954097734461
Gm10814	-5.67291168438394	0.0440332255593246
Gm11127	-1.84042632441573	0.0200362385921406
Gm11413	-1.79990444745373	0.00690089271430794
Gm11517	-4.54622698879825	5.10806666474454e-12
Gm11544	-3.21928354692429	1.44070191962754e-08
Gm11974	-2.92772395492812	0.00133567780850208
Gm12504	-2.71409212684371	0.0191101474374369
Gm12789	-3.9160865312183	3.09043845601809e-10
Gm128	-4.79221077127048	0.00163737667248577
Gm13034	-4.00484385986799	0.000238115107916615
Gm13078	-3.65403417160681	0.000230753755933266
Gm13102	-3.2848577687854	0.000544940491146873
Gm13826	-1.77671532678454	0.00426901449527991
Gm14458	-4.80882910096211	0.00201395439502373
Gm14499	-4.3550782451297	0.00211340453776382
Gm15455	-3.95495409465915	1.59208311698336e-05
Gm16157	-4.17861304715505	0.0127304416244744
Gm16367	-3.28403963395338	5.64403423619471e-08
Gm16381	-6.49736834943675	1.07553735888659e-23
Gm16853	-7.66049577827423	2.30395362922248e-09
Gm16938	-1.61894064427643	0.0274356233210966
Gm16973	-2.14367101093841	0.000424735039789042
Gm1995	-4.10563650583969	2.74075856484944e-10
Gm2016	-2.78787230525796	0.00266248304359484
Gm20172	-2.80848746273561	0.0234732118384177
Gm2022	-1.78432086154842	0.0319806858141039
Gm2027	-1.76359714925964	0.0373008224434619
Gm21319	-2.44143425556755	0.0101980054045404
Gm2381	-3.44915609212998	0.00549516597423904
Gm2a	-3.61463183945846	2.84743887908634e-06
Gm3139	-3.78603600831267	7.49674353049413e-11
Gm3258	-2.03530382718324	0.0193663537634774
Gm3286	-3.77662436064663	5.67275957946115e-09
Gm4349	-4.12995923455516	1.97187632295122e-05
Gm4827	-5.6061155396351	5.51195900591093e-07
Gm4850	-3.46671251892393	4.6945718421574e-06
Gm4858	-5.34007963470518	8.31720522178024e-07
Gm4907	-5.34485367683095	0.0244812841055473
Gm5	-2.27211286534649	0.002875666067163
Gm5148	-3.04723236436103	5.96704353739026e-06
Gm5176	-3.33340158371368	0.000976730002918126
Gm5634	-4.86312872662348	0.00134289116087683
Gm5635	-5.42064364458716	0.00154148293517743
Gm5662	-2.49426211242936	0.00439957828491191
Gm5801	-3.70054091172249	0.00674576348713766
Gm5860	-1.67535898742237	0.00947273894297408
Gm608	-1.28180932506554	0.0446034495314752
Gm6402	-3.07414084781038	0.00154148293517743
Gm6432	-3.93035461331237	0.000807498175086689
Gm6525	-3.14937959274933	0.00274867318722454
Gm6568	-2.70769849093101	2.13400097454622e-05
Gm6642	-6.09592230800721	7.42376547154087e-08
Gm6654	-2.75718942796307	0.00103892165326014
Gm6792	-3.29140501946675	0.0147191935998285
Gm6880	-5.06719257933335	8.44762022249969e-07
Gm6890	-4.1668155325185	1.99062796396528e-07
Gm6902	-2.16286118326381	0.0021487357306952
Gm7104	-3.68335369657044	2.14278769603147e-07
Gm8300	-2.23320094013931	0.00178063764221276
Gm9	-2.57025461332433	0.019919281454112
Gm9125	-5.80650231233607	5.67699246281759e-06
Gm9199	-3.06398530592857	0.022130750994759
Gm9376	-6.16175479533014	8.12559058624995e-15
Gmeb1	-1.81835835559674	0.00286752324883994
Gmeb2	-5.89698080853992	5.598677478375e-09
Gmps	-2.186398079203	0.000274989426992977
Gnl2	-2.39068523341387	0.00024298978644925
Gnl3	-1.79417037404949	0.00338051235362156
Gnl3l	-3.62854079010228	6.38316136187275e-08
Gnmt	-7.23313431602199	0.00580327479695592
Golt1b	-2.27925256440852	0.000430782809862883
Gorasp1	-7.30292211066159	6.87645497147806e-06
Gpank1	-2.80615917936137	0.00020840182424374
Gpatch3	-4.73415297357817	8.45756546742023e-09
Gpatch4	-2.85313286502506	0.0195721281239096
Gpbp1	-1.43102185001569	0.0126403263070468
Gpcpd1	-2.15623815907158	0.000362305208082543
Gpkow	-4.8685541581447	0.000713836093934345
Gpn3	-5.64879970890653	1.21504707440832e-11
Gpr124	-4.1005427105154	0.00482592920440929
Gpr146	-6.05329135341734	0.000533021581920786
Gramd2	-3.31457517385166	0.0401721353664694
Grap	-5.03488064279342	0.00299474732604176
Grb2	-1.82635883175697	0.00371234185880453
Grhl2	-3.2610600790462	0.017813301320884
Gripap1	-3.34667178269643	0.00298481167380045
Grpel1	-1.97915111095167	0.00728717829445009
Grpel2	-2.40232138596549	0.0127979571008562
Grwd1	-5.25669881529334	8.44440531011049e-11
Gsg2	-2.22580117980108	0.000127513247067351
Gsk3b	-1.47761416133799	0.0259472926954354
Gskip	-4.62493827395877	1.78674686460092e-09
Gtf2e1	-5.15087447780515	8.28268535817219e-13
Gtf2f1	-4.40806762737937	0.00018352081294886
Gtf2f2	-1.7890658598471	0.00570697172114749
Gtf2h5	-3.47434339026022	1.33278142567084e-07
Gtf2i	-3.90631676145417	9.29957080566155e-05
Gtf3c1	-2.49537933842981	0.00094376888624451
Gtf3c4	-3.54776750319053	1.4036141244127e-08
Gtf3c5	-6.08236179875988	5.21852703519e-14
Gtf3c6	-4.49839938327464	6.7780328625331e-10
Gtpbp3	-4.92917113819769	1.01750156347577e-05
Gtpbp4	-2.95917737358201	3.51761107399885e-06
Gtse1	-1.84016736426905	0.00248156141860507
Gucd1	-2.97147526507379	0.00507217537560184
Gxylt1	-2.30634362744592	0.000378164155026031
H2+AC0-DMa	-8.37960017476945	2.01285732536497e-07
H2+AC0-Q10	-6.16401575830524	6.17745754794685e-12
H2+AC0-Q5	-6.94358724577993	1.66280897207179e-10
H2afv	-3.46296644471987	1.45746868480214e-08
H2afz	-2.74765441798772	7.82375418261521e-07
Hacl1	-4.03301533519868	0.0108564728722256
Hagh	-3.0416962771638	0.0155166276656827
Hars	-2.7206098675278	0.000416730314749967
Hars2	-5.31975318487888	0.000139647975136262
Haus6	-1.86292493388471	0.00983083279989592
Haus8	-2.58496643949892	0.0109474556156142
Hbp1	-1.26903454546292	0.0225786041842903
Hccs	-5.15767542472147	8.69302859822649e-16
Hdac1	-3.2798444398026	5.94106008106924e-08
Hdac6	-1.38709084577052	0.0187054761786951
Hdgf	-3.05111461075002	2.52839499857214e-07
Hdgfrp2	-2.85753890293609	0.0052993738707646
Heatr1	-1.72406224775746	0.00700321067399928
Heatr3	-2.36616069285121	0.00232116559317448
Herc4	-2.7531157371258	0.004804488474149
Hesx1	-3.12671888878196	0.0235276455059876
Hexb	-5.67325916285628	4.18314877368082e-16
Hexim1	-2.39473490971348	5.05975432876273e-05
Hgh1	-2.88060388450967	0.00118830080256821
Hhipl2	-2.7954901764908	0.00398443574415018
Hiat1	-2.239057288487	8.521820122861e-05
Hic2	-2.85590416886036	2.5251009394513e-06
Hilpda	-1.74028821737243	0.0391508907257961
Hinfp	-4.96635846057818	3.91558373984292e-13
Hipk1	-6.02236134102889	1.02302445160723e-18
Hipk3	-2.05498245849315	0.0185765146686964
Hlf	-4.02643852144874	0.0275520865291919
Hmbs	-3.66708234285284	1.54382248012465e-06
Hmgb1	-2.23295242039777	0.000345720977720739
Hmgb1+AC0-rs17	-2.82854688767115	0.0120929828392417
Hmgb2	-1.89111880041672	0.00094376888624451
Hmgcl	-3.58125318291541	0.00189440320715371
Hmgn2	-2.18886619366681	0.000249213053276192
Hnrnpa1	-3.9820442764998	1.20570946420218e-06
Hnrnpab	-1.99346572760706	0.000256094727552148
Hnrnph2	-1.6307443951651	0.00679446333019405
Hnrnpk	-1.58986180452242	0.0055083150327864
Hnrnpm	-2.44497551020475	4.47451493081169e-05
Hnrnpr	-2.55625421792252	0.0090298456780539
Hnrnpu	-1.36305589345006	0.0145023518590487
Hpdl	-4.56837658501663	0.0358060180060042
Hps5	-2.006475835155	0.00815157660013891
Hps6	-4.03333712425634	0.00260474721138121
Hras	-1.84159971943019	0.0370475089691434
Hs6st2	-4.92843791584241	9.22872109719164e-06
Hscb	-1.62502774183276	0.0151707197526916
Hsd17b14	-7.20775279683731	3.97560513811164e-08
Hsf2	-2.60027843921904	0.0281686396830964
Hspa14	-1.54507182191965	0.00521419716794757
Hspa1a	-4.05156586509411	0.00105866892910254
Hspa2	-1.92103519078565	0.00633284483776191
Hspa4	-3.74750183188147	6.40554068936408e-10
Hspa5	-1.86110656571095	0.00167281771180342
Hspa8	-2.01239327134884	0.000530481516895678
Hspbp1	-3.78653474940854	0.00334244221859885
Hsph1	-3.7061280241783	4.34550842245269e-06
Htatsf1	-2.85104279045879	0.0101370613776562
Hyls1	-2.65943875679829	0.00274867318722454
Iah1	-4.30461242045761	1.71905206932243e-05
Id1	-2.33889795112301	0.0435475133523456
Idh3g	-1.24230183972627	0.0134581636166128
Ier5	-2.08551285321971	0.0215773533353248
Ifi35	-5.05327687561605	6.85933671326014e-07
Ifnar1	-1.92612073744605	0.00635047862406474
Ift20	-1.71487631940602	0.0044006228804337
Igf2r	-1.56389336273048	0.00745828361143893
Ikbkg	-2.47271096609507	0.000180077908171677
Ikzf5	-2.19406788189441	0.00615411843007904
Il17ra	-2.21350762625781	0.000430539423661222
Il1f9	-1.34452605371937	0.0408507730150019
Il6ra	-Inf	4.34842159023322e-07
Ilf2	-3.20256752953959	0.000753714525618772
Ilf3	-1.69783567805454	0.017811077904576
Imp3	-3.33012465938328	1.43675433735146e-08
Impa2	-1.89246896833393	0.0113330292604552
Impdh1	-4.51355651630026	0.00217358652226248
Impdh2	-3.84260660382899	4.27412694044145e-11
Incenp	-2.22390457868166	8.9243054648257e-05
Ing1	-2.04067420463832	0.00026521665603171
Ing4	-4.54493396976337	3.63273144919449e-07
Inip	-4.88186627871559	5.702902644771e-12
Ino80c	-1.3544013961377	0.0490621727582224
Inpp4b	-4.61397652181786	0.000342461641220894
Ints1	-4.82932499923501	6.77053013362756e-05
Ints2	-3.183157094363	8.37278860030497e-08
Ints5	-3.47065884913134	6.41738225052686e-07
Ints6	-4.19886160449687	5.79987830907534e-06
Ints7	-4.51328333184135	0.0187008215164374
Ip6k1	-3.74294685021309	9.48238946395111e-06
Ipo11	-2.22419237512477	0.0012047301026388
Ipo4	-2.45618610666296	0.0385009767645769
Ipo5	-2.10665386477078	0.000422847037353143
Ipo7	-4.11608634770624	1.53537820047296e-05
Iqcf1	-3.4393322881551	4.47922406428047e-06
Iqcg	-2.34934182828071	0.00146506373224989
Iqub	-3.75868202366607	0.00405110387978185
Irak2	-2.25230768656767	0.0219746745409412
Irf1	-1.83956404310919	0.0279104769317844
Irf2bp1	-3.9137987429268	0.00107963566512421
Irf3	-3.62092411466895	0.00599836899857523
Irgq	-5.38099467943322	6.68095890948109e-14
Irx2	-3.35636138013442	0.0148853904170756
Isca2	-2.71375441771871	0.0111742194158808
Isg20	-3.01927336809495	0.0163017388266292
Isg20l2	-4.35831982090144	8.94717850530279e-05
Ist1	-2.88962444014742	8.49348944247312e-07
Isyna1	-4.58367369970424	0.0118508334946416
Itga10	-4.10018025431277	0.01893352786588
Itgae	-4.67310911091766	0.000580891486702308
Itgav	-2.91859835974687	0.00906048510008588
Itgb5	-3.28224918554047	0.00178533453892288
Itpa	-2.96802997762182	0.000208545977847608
Itpkc	-4.68650742635004	1.86099696701906e-09
Ivd	-1.51607305356565	0.0375870670006327
Ivns1abp	-1.40486066128668	0.014595312132733
Iws1	-3.04744180804777	6.00693724094313e-07
Jade1	-4.78593413645023	0.00183195748802086
Jade3	-5.01219060086897	0.000274989426992977
Jakmip3	-4.39324734344995	0.0117313969197575
Jkamp	-1.7311928998612	0.0194450173757585
Jmy	-4.85604409026659	9.79802365224248e-13
Kank4	-5.49412078014153	1.19110962095045e-07
Kansl2	-1.61887326871228	0.00350906931620762
Kansl3	-2.13141863017263	0.0122502798408427
Kat2b	-2.70853379669539	0.000517736029179287
Katna1	-1.16734196514716	0.0317120662450328
Kbtbd2	-3.97686910004327	6.53115913189615e-07
Kcnk5	-2.23618786093149	0.0269900270445921
Kcnk6	-4.73364715188955	5.15185093399838e-05
Kctd18	-3.07570375614976	4.13463721068272e-07
Kctd20	-3.478308128319	4.77909148432729e-08
Kctd6	-2.0795832544612	0.0242734486417593
Kctd9	-2.06413904678896	0.000484310742001577
Kdm1a	-3.03316666809573	0.0131312171478398
Kdm3a	-2.77131048802388	4.50417070190561e-06
Kdm4b	-3.80723818320104	0.00361347603937268
Kdm4c	-3.94333608514652	5.55485260734864e-05
Kdm5a	-3.93204375937198	1.13606455026994e-08
Kdm5b	-4.23140859173608	3.68038620081994e-12
Kdsr	-2.15763000834673	0.0068716394078232
Khdrbs1	-2.39143003530981	1.46883503521413e-05
Khsrp	-2.17156954772797	0.000664368329327539
Kif11	-2.91536374242814	5.97984460125913e-05
Kif18b	-3.44824008794786	9.33767235454648e-08
Kif22	-2.39378831069188	0.000945339051857589
Kif2c	-3.49898871357196	4.80120502947471e-05
Kif3c	-4.20142510826319	0.000441416049210537
Kifc2	-5.09868828620286	0.00232723233414506
Kin	-4.64794822401364	1.94690875463166e-11
Klb	-3.58580839951095	3.53024025461761e-05
Klf3	-7.98641818770992	1.75352790933603e-08
Klf4	-4.82933126885262	2.01696803759433e-10
Klf8	-4.80969157631833	6.27841342363707e-06
Klf9	-6.62953301403932	2.16584971384704e-09
Klhdc4	-4.0129200268584	4.44626926626537e-05
Klhl11	-4.50628167664481	1.82510441009072e-10
Klhl15	-2.28063215076546	0.00749790104313225
Klhl17	-7.71855250022389	0.000364882104377156
Klhl21	-5.3224462857998	7.25848548025594e-14
Klhl24	-1.99940394670254	0.00769391539965943
Klhl7	-3.81035213205893	0.00418167451735584
Klrg2	-6.71474919351146	1.97970907564267e-08
Knop1	-3.58148690407037	6.06395326823463e-07
Kpna1	-5.37182560672994	1.3793772666014e-15
Kpna4	-4.86382117961731	5.12436448570082e-13
Krr1	-2.49848734681479	0.000153615248224939
Kti12	-2.70192924800195	1.12923614411347e-05
L1cam	-4.09341157312937	1.90652120118091e-05
L1td1	-5.14922565473107	1.91363467917904e-11
L2hgdh	-4.49041014852005	9.26494822706015e-12
L3mbtl2	-2.88835675983617	0.00260939371831907
LOC101055769	-4.8811939492013	0.0340018499102959
Lage3	-1.75262266019048	0.00495405787797593
Lamc3	-Inf	7.44228109037691e-08
Lamp2	-4.91730674666678	4.01722052838479e-09
Lamp3	-5.75300845734642	0.000159290132041213
Lamtor1	-1.73924472752603	0.0109667659764874
Lap3	-1.71592318247782	0.0126321851203519
Laptm4a	-1.58874422193889	0.0139917325963793
Larp1	-4.2845585138859	1.17434754400037e-06
Larp1b	-4.5338230689682	3.1340033179426e-14
Larp4	-2.76447391682255	1.77224098386417e-06
Lat2	-3.61441884914851	0.000145077422199291
Lbr	-3.9473438665887	3.03220521940457e-10
Lbx2	-3.62655168864072	0.000104833071805706
Lck	-3.61562352908284	2.37141790774263e-05
Lclat1	-3.29659178125202	2.56486044157916e-08
Lcmt2	-1.7040955747869	0.0142808111652952
Lctl	-5.82663138343491	0.000132176050573597
Ldlr	-3.86730885203141	0.0428990107401975
Lemd3	-5.11117195189582	5.33701277108078e-06
Leng1	-3.11560232546122	0.000102415708897076
Leng8	-1.58638216653126	0.0200733667718373
Letm2	-2.11433109203424	0.00227236476727776
Lgals2	-8.25013342433203	6.44083072518638e-09
Lgr4	-4.01076414702891	0.00109550253690842
Lias	-4.01961705493155	8.60408332922174e-09
Lig1	-2.06583916719836	0.0109667659764874
Lima1	-1.64727006100666	0.0215773533353248
Limch1	-1.34758922765071	0.0188672710340964
Limd2	-3.88057727770915	1.33778268747e-05
Lime1	-4.89831939985245	1.53170120249947e-09
Lincenc1	-5.25340396737774	8.63318575048506e-05
Lmnb1	-2.17448639831544	0.00545234866076596
Lmod1	-4.22432443437447	0.00219640104812943
Lmtk2	-2.90677898635426	0.000317365000771316
Lmx1a	-1.76828377190184	0.00575085088764745
Lnp	-3.47744061068433	7.47382127815561e-05
Lonp2	-1.57014948414437	0.00392985624203756
Lpar6	-5.54739532606729	6.05883084020329e-05
Lpcat3	-2.78907906862553	0.0354737572161591
Lrif1	-1.75432125405295	0.0430730416337932
Lrr1	-1.77424644749519	0.00564255660622804
Lrrc2	-1.80621544033029	0.0281905818819595
Lrrn4	-2.26855969211532	0.00643357570368208
Lrsam1	-8.89442013662927	4.57483120517167e-08
Lrwd1	-3.36271120801988	0.0205495612410607
Lsg1	-5.87600334338008	3.63584096942077e-06
Lsm10	-3.05568535616288	0.00372390564326775
Lsm12	-4.38107796638775	1.75067345710423e-06
Lsm8	-1.87229633840199	0.00583368930700917
Lss	-2.57571894012547	0.000597340884533851
Lta	-4.64352115521624	0.00656998016925247
Ltv1	-2.58649813316006	2.43845630122778e-06
Luc7l	-1.60326343912829	0.0095735564334975
Ly6e	-1.84274906082498	0.0295653471996542
Lyar	-1.76159496039802	0.00437864955316061
Lyrm1	-3.20811087453457	0.00611718352501444
Lyrm2	-3.7668377895185	0.0029860861130604
Lysmd1	-5.96366999565504	7.36212965004106e-13
Lzic	-1.95652992128496	0.0144988838009255
Lztr1	-2.3745035921648	0.0160814438725077
Macf1	-2.10070148126358	0.00499276830778147
Maff	-4.82933158474015	0.000351063049226702
Mafg	-3.04465891038386	0.0444349239643793
Mafk	-3.55586345925024	0.000901414871083993
Magt1	-2.06535710204985	0.037535406058031
Mak16	-5.32715453109148	6.40624725217062e-17
Malat1	-2.18059233053244	0.00227236476727776
Malt1	-3.46197549437979	0.000477805764642181
Maml1	-1.76710522765144	0.00477932867546004
Man1b1	-1.91049282558979	0.00681090424865941
Man2a2	-2.10988286121673	0.00172384812322837
Man2c1	-3.94650994703927	0.0104962523923543
Man2c1os	-5.53787850920079	0.000347657947530663
Manbal	-3.45042693699659	0.0219047636455304
Maneal	-6.85526854775667	0.00103578558231727
Manf	-4.00564349664541	6.16417797449873e-10
Map10	-5.33354721777186	3.9748773843366e-12
Map1lc3a	-2.18440676881199	0.0282542733492648
Map1lc3b	-3.51248421471263	8.03474799449788e-10
Map1s	-2.84189611931383	0.0126922962217422
Map2k2	-4.1661820024548	0.0046942689142977
Map2k3	-4.6199209518516	2.83392334299779e-06
Map3k14	-Inf	0.000339486377585422
Map3k3	-4.43068219654255	0.000351170170185141
Map6	-5.53302441308571	0.000168374970627659
Mapk14	-3.46642487163079	5.29242266891442e-09
Mapkapk2	-4.13070441457737	6.73909257259887e-05
Mapkapk5	-2.32624500971432	0.000145968868039733
March7	-3.63470243338934	0.000160892923033433
Marcksl1	-4.06103718083589	1.31020022777147e-07
Mark3	-4.08977939346445	1.13430895749806e-10
Mars	-3.12841370812331	0.000494120184926649
01/03/2002	-7.51509518842955	5.34696674836931e-14
Mast1	-5.98977090348851	9.38612396619103e-06
Mat2a	-2.815678135714	1.92520277475594e-06
Mbd3	-2.19123336744274	0.0153404266087291
Mbip	-1.98870837423871	0.00247510181615013
Mcl1	-3.28057087534498	3.88972718506825e-08
Mcm3	-2.02437171873083	0.00152118744885678
Mcm5	-1.45642978291741	0.0243947325423316
Mcts1	-3.67116725235279	0.00514362206335404
Mcts2	-1.48004846899709	0.0457505328955855
Mdc1	-2.27409642720442	0.000184213135895651
Mdh2	-3.50629086890643	1.16149206488506e-08
Mdm1	-2.44456206956475	0.00318226238611741
Mdn1	-5.1458672021289	1.04516451158341e-12
Mdp1	-3.09422187793034	0.0054531794214057
Med12	-1.9742314571685	0.0418161466185762
Med13	-1.73957456066117	0.00457351384082009
Med13l	-1.94277580816171	0.0082465390751436
Med16	-1.96934317543435	0.028368728203659
Med19	-2.34417358707103	0.00348723645957113
Med26	-3.15852572922829	0.00096815820413229
Med29	-7.04311783736729	1.07553735888659e-23
Med7	-1.98573634092641	0.0252029537377205
Med9	-3.21194322076585	0.0036827223657591
Mef2a	-3.86571698451471	7.32273797573116e-07
Mei1	-4.45655429954495	0.0130900466001523
Meox2	-3.22459386516084	0.0141732627352061
Mepce	-3.02410231944618	0.00269602557578774
Mertk	-2.33497302455052	0.00676678289731065
Mesdc1	-2.28668229058166	0.0358060180060042
Mesdc2	-3.0115648304263	6.71210643573087e-05
Metap1	-1.74405409870643	0.00734959474395575
Mettl13	-3.91898425587472	0.00386048318820729
Mettl16	-4.18687823336825	5.84554624400566e-08
Mettl2	-3.95215921318821	2.36823654538391e-07
Mettl23	-4.15740909892281	1.34272537809987e-06
Mettl4	-1.70098144207476	0.0191306693764815
Mex3c	-1.42914781757368	0.00569986409343486
Mfap1a	-1.45719189032971	0.0237865803578281
Mfap5	-5.33593076939745	2.7229519953409e-14
Mfsd11	-1.84180991623545	0.00171680933520388
Mfsd2b	-4.2233179739198	0.000707820700212929
Mfsd5	-5.21139929305006	5.75343313218096e-06
Mfsd7b	-8.13981447890527	5.34443503364456e-18
Mfsd7c	-3.78718426595717	0.000224403692608293
Mga	-2.85051917876478	2.08165608449028e-06
Mgat2	-5.7448326603089	2.81591897623969e-16
Mgll	-3.90509458655517	0.0018429439254339
Mgme1	-2.25439694030555	0.00182096831668299
Micall1	-2.624060129838	0.033173713623174
Micu1	-2.47329901802306	0.00378831796324203
Mief2	-8.03645829342334	1.06647865199119e-05
Mier3	-2.56297829852459	2.0544177696294e-05
Mif	-3.27791719225565	0.00468033289529866
Miip	-3.87150401031091	0.00239636503334069
Mir17hg	-2.3231579483939	0.0230358093085055
Mir22hg	-3.04261802551278	0.00446318138571345
Mir684+AC0-1	-4.39365055280897	8.30360371331939e-06
Mis18a	-2.7301080441805	1.46883503521413e-05
Mkks	-1.42715900242605	0.0116713739585981
Mknk1	-1.95413374727297	0.0192733184986467
Mknk2	-1.3097734752685	0.0334146763940264
Mkrn1	-1.48742020179284	0.0219047636455304
Mkrn2	-1.44417580993565	0.00756403010567945
Mlec	-2.29498656867206	0.00126371990603984
Mlh1	-3.04955146846476	0.00429143638143717
Mlxipl	-2.14456092151213	0.000192168345151987
Mmp19	-6.27037847627733	0.00061666097806925
Mnat1	-2.76392743241095	4.95928916980706e-05
Mnt	-2.73560769989538	0.00969295712339799
Mob1a	-3.21112205210958	0.000692472061771235
Mob1b	-1.69069940024323	0.0159386233566548
Mocs3	-8.56745270395232	6.96515979356262e-14
Mogat1	-Inf	7.64053831760198e-08
Mon1a	-5.21831829961646	1.00645496145177e-05
Morc2a	-3.97577743221368	1.04073486602739e-08
Morc3	-4.00693260400011	6.00693724094313e-07
Morc4	-6.32323356133761	0.000126017707531349
Mov10l1	-2.1391987554308	0.00539159340279087
Mpc2	-2.61216923520172	5.24803450623234e-05
Mplkip	-2.55182898970985	0.000564540320603769
Mpp1	-1.99139655940928	0.00568633481121233
Mpv17	-2.0327676936513	0.00177476952086536
Mpv17l2	-3.23372738985677	0.00571841806868604
Mrap	-2.95748618677432	0.0127304416244744
Mrfap1	-2.01485015381015	0.000924994143108475
Mrm1	-4.7330191606763	1.79933164044089e-05
Mroh8	-7.37662993095229	0.000500878324023294
Mrpl12	-2.00799222272402	0.0115378335429317
Mrpl15	-2.38240703294957	0.00181917625827589
Mrpl18	-1.21804519387957	0.0493261743275124
Mrpl20	-3.67800293133717	4.94359469033215e-07
Mrpl22	-2.41860646780582	0.00461467167985821
Mrpl28	-4.42982213134082	0.0307224958419016
Mrpl33	-2.84731045509114	0.0435155627515239
Mrpl34	-2.39616749267763	0.0266688087378694
Mrpl38	-2.6224639262216	0.00909585536036156
Mrpl40	-1.68144920230743	0.00466813680053186
Mrpl41	-4.05259662002483	1.68240443389538e-09
Mrpl43	-3.47963902684539	0.000267165510089591
Mrpl45	-3.11706753303245	0.00347314430438216
Mrpl46	-2.29213463066412	0.00639882417425748
Mrpl49	-5.40548614317481	1.21486948817253e-08
Mrpl51	-3.67546454079638	1.59763225762874e-05
Mrpl54	-2.4181401753044	0.0448448291372376
Mrpl57	-2.98037442351526	0.0365745042817343
Mrps11	-4.22062502169192	0.0189524684682401
Mrps12	-2.57203194228738	0.0266202076344256
Mrps15	-2.39053475610832	0.0104224042472323
Mrps18b	-1.68922486426666	0.025360965029813
Mrps24	-3.01852511737986	0.000607782321839939
Mrps26	-2.19881826761548	0.000249769618818637
Mrps30	-2.14205327906932	0.00250895136297549
Mrps34	-8.92390792683674	1.21680059797376e-05
Mrps6	-2.43186186298089	3.40401997260161e-05
Mrps7	-2.85155143782861	4.47463133697448e-06
Mrto4	-2.59212843911802	2.75076998306465e-05
Msantd2	-4.37292383640298	2.35642544226899e-06
Msrb1	-4.00917006190527	1.35100473282277e-06
Mt2	-3.80564497925145	0.010211201805519
Mta2	-4.07157655689496	3.40294624796813e-09
Mtch2	-3.34797051602055	2.01100827313634e-06
Mtf2	-2.81673307391393	1.37372372164028e-06
Mthfr	-5.05483857445657	3.68001798135295e-14
Mtmr1	-2.88487412012678	0.0495782774771145
Mtmr12	-2.54297051557242	0.000862914346426353
Mtrr	-2.19770244774561	0.00399922142094151
Mtx2	-4.38247769774584	7.6314133420953e-06
Mul1	-2.43340547713574	0.00763853431119867
Mum1l1	-4.51091361330656	0.000968070754874943
Mvk	-7.76742540021635	3.97319471955035e-06
Mxra7	-3.54806244040689	0.0434405553189611
Myadml2	-8.50198259070391	1.70467121019913e-07
Mybbp1a	-4.64209326709129	1.59850114140677e-09
Mybpc1	-2.45982907629317	0.031344069275318
Myc	-4.12201921656088	0.0245386484196851
Mycbpap	-6.30449323626638	3.67596933652489e-06
Mycs	-7.62460038781419	0.00129833663826357
Myg1	-2.95790004321261	0.0349013990552633
Mylip	-2.50739352455539	0.00771082557641913
Myo15	-4.88095052605898	0.00407153880541027
Mzt2	-3.9009487875968	0.00247581312677022
N4bp2l2	-1.40336876238187	0.0194402118430697
N6amt2	-3.05621576274788	0.000883184648338285
Naa15	-3.33076412135496	2.86115820029256e-07
Naa38	-5.24238880961229	1.36487455825617e-06
Naalad2	-1.83289285907393	0.00554532173113736
Nacc2	-2.42172877920538	0.000617421046131768
Nans	-3.87782233212537	0.000479415357271282
Napa	-1.88885787236663	0.00399290713906962
Narfl	-5.01315328755472	2.53986483237057e-06
Ncapd2	-2.3622272000442	0.000196591447037236
Ncaph2	-1.48037037548436	0.0287139094382547
Ncbp1	-5.24171883245922	3.34499079816982e-13
Ncmap	-3.02002268147345	0.0247708225303894
Ndfip1	-1.9101576047344	0.0156885295451664
Ndufa11	-2.46202013117906	0.00677907011173493
Ndufa2	-3.48520405764163	0.000118183353776765
Ndufa7	-2.18765469382768	0.0209834844269517
Ndufaf1	-4.23799374400978	0.00104134448414752
Ndufaf5	-4.05112276109708	5.50328383347738e-05
Ndufaf6	-5.06754236281768	0.0124234535083472
Ndufb10	-2.50443456730559	0.0127979571008562
Ndufb11	-1.68601511197273	0.00400561700802351
Ndufc1	-4.25228469113315	0.000664904408609899
Ndufs1	-1.80448708669929	0.029235323653116
Ndufs8	-3.016925439827	0.00250005663184621
Necab3	-4.52320865361443	0.0101870860530976
Necap1	-3.54517368419715	7.26097502033069e-06
Necap2	-4.54129764626694	0.000178225111465349
Nek2	-1.51491012207675	0.00509976218639736
Nek9	-2.32984599309093	0.0270816906748476
Nelfcd	-1.43192499649486	0.0451548206213246
Nelfe	-1.50851068861296	0.0404018637855691
Nes	-5.28219218809245	0.00739893772181238
Neto2	-3.10569147755377	0.00746505340222185
Neu1	-5.00525859803676	8.72199176914168e-11
Neurl2	-6.86472278134593	5.02573728531054e-07
Nfam1	-2.84196251149395	0.0239266499279715
Nfatc2ip	-1.96079411672653	0.000619351839651232
Nfatc3	-3.4374279912321	1.44741507453879e-07
Nfe2	-6.49818146194133	1.03157566573099e-09
Nfkbia	-2.6118031308547	0.0102611183425341
Nfx1	-1.88766709701579	0.00861611554262157
Nfyb	-2.74452067752831	1.11800980399559e-05
Nhp2	-3.41820140571944	1.45539788423226e-08
Nhp2l1	-2.27693296019797	5.48437301236537e-05
Nifk	-3.24246187364475	1.49931325275254e-08
Nip7	-1.48906499666275	0.0152335179483065
Nipa2	-5.55069728723887	3.4009649029915e-13
Nisch	-1.77043840848219	0.0293230574100588
Nkrf	-2.04410345972242	0.00223519543747099
Nktr	-3.08648216838461	7.39744558491981e-07
Nle1	-5.77209358320574	5.87281247099278e-05
Nlrp12	-5.57745470562537	0.00048344010683137
Nlrp1a	-1.85901972892158	0.00397696702757255
Nmb	-3.05536784252179	0.00120420656934049
Nmd3	-1.82974809132981	0.00240959859031854
Nme2	-4.19971092668531	7.41054559816913e-05
Nme4	-7.41982200732761	3.68182813518301e-06
Nme5	-2.41418314392282	0.00332524154884262
Nmnat1	-4.8575286978339	9.81433300411688e-05
Nmrk1	-1.54086264677407	0.0450532640412282
Nmt2	-1.70964976906025	0.013949767743622
Noa1	-3.47366959558471	1.14401750442126e-07
Nob1	-4.21103004684362	8.06103523496433e-11
Nol11	-4.85535974412398	1.06959179142086e-13
Nol12	-2.45917837470077	0.0053271346246324
Nol6	-2.71626318461704	0.0186450651096342
Nol7	-4.70089971780845	9.77712961179563e-14
Nol9	-2.762989493807	1.99580998790884e-05
Nolc1	-2.83104594208758	3.14033651144261e-07
Nom1	-3.57628410766067	4.19720269903495e-07
Nomo1	-1.75409190548504	0.0351059356430593
Nop14	-1.77315027451383	0.0022218637384608
Nop16	-5.89533534438831	6.75313238115181e-15
Nop2	-4.48298099442242	1.81348436530246e-12
Nop56	-2.91686843981031	9.93215715096823e-07
Nop58	-4.33220699464879	7.49674353049413e-11
Nop9	-5.86924262089706	3.06863061699099e-14
Npat	-2.06166604354042	0.000598729793086713
Npc1l1	-2.97688712472641	0.00441082187060527
Npl	-5.47955987689908	3.02125337317075e-16
Npr1	-2.99105905064137	0.0498771299163787
Nptx2	-1.84837047677493	8.69072331204959e-05
Nr1d2	-1.45463294340487	0.024917425153652
Nr1h3	-3.27044317008246	0.0127011700943883
Nr2c2	-3.21007320031991	4.4341625353366e-06
Nr5a2	-2.03804653429144	0.000594164814176545
Nrip3	-6.85935816306771	1.17815523892517e-07
Nrm	-6.59394490663594	8.71354126407992e-06
Nrsn2	-3.28482617686568	0.0248514219338342
Nsa2	-1.83093480972253	0.0108398626678876
Nsl1	-2.51945090937272	0.00128584448973386
Nsun5	-5.09784821173664	2.83423657013816e-10
Nt5dc2	-6.88370825908195	0.000811359849147926
Ntmt1	-4.92925523203186	2.40924959159725e-08
Nub1	-4.26950071320854	2.34535684987438e-12
Nubp2	-1.60896614704089	0.0117020128181967
Nucb2	-3.92436695717769	0.000159535863880679
Nucks1	-1.80067367764411	0.00504892936346804
Nudcd2	-3.55398521835152	2.91427146988313e-08
Nudt21	-3.90692157982239	2.4625530938138e-08
Nudt22	-5.79187285892052	3.01904480645135e-05
Nudt4	-2.1680775977916	0.000102725835435784
Nufip1	-5.0275228761041	3.91558373984292e-13
Nufip2	-1.54222081656985	0.00495405787797593
Nup107	-2.0226977879942	0.000377290924752324
Nup133	-3.05019060362476	7.04215306304714e-05
Nup155	-2.82065583419634	2.08076932365735e-05
Nup205	-1.38887122504735	0.0195981655506856
Nup35	-1.24927791060892	0.020269258839377
Nup43	-2.29505080857743	0.000445694095680606
Nupr1l	-5.57068774689011	0.000129052483863341
Nvl	-2.79379217594189	0.0019275090040925
Nxf1	-3.24476920169203	1.08196666262084e-07
Oaf	-6.28479363808696	5.60793294933795e-10
Obox3	-3.47759755003731	7.06855888717506e-09
Obox6	-5.14905258506044	1.3096659998805e-16
Ocln	-5.82647240013223	4.0527819329723e-08
Ocm	-4.81648897984271	1.77086617602958e-05
Odc1	-1.4660077372418	0.00667263445913904
Ogfrl1	-1.70943925185509	0.0478103679684001
Ogt	-2.05538162161765	0.00131563049607203
Oip5	-4.7722082378369	2.94273383057682e-10
Ola1	-2.31842041300856	0.00814864217789821
Olfr1372+AC0-ps1	-5.52372962286028	0.00513228102629929
Orai1	-2.81936596306753	1.09692962411788e-05
Orai2	-8.9719825717014	6.27841342363707e-06
Oraov1	-5.63348705751286	2.61806639521421e-06
Orc1	-2.15051122665239	0.000265776982103813
Ormdl3	-6.04889943924824	7.63130996366556e-05
Osbp	-1.91610975266521	0.0012963328088628
Osbpl6	-3.4241010730899	6.56233053712082e-06
Osgep	-3.5796524207845	7.72392224428049e-06
Ostm1	-4.88459286373425	9.51252360015096e-11
Otud3	-2.40320588129567	0.00762439652959126
Ovol2	-5.09847376521982	1.86694997763906e-05
Oxsr1	-4.2543922429011	7.96500822577939e-07
P2ry1	-3.31525685946193	0.00844622504067269
P4hb	-1.23853241443206	0.0411667785220089
Pa2g4	-2.50058242547044	1.57755595569083e-05
Pabpc1	-4.37119653495362	9.88206187441126e-13
Pabpn1	-1.46574819906204	0.020143977981976
Paf1	-3.1691429520952	0.00722244446097118
Pafah1b2	-1.73011753265668	0.00195001827336315
Paics	-1.66722597372239	0.00301498326733709
Pak2	-1.73225374809098	0.0277599580287772
Pald1	-4.98601122470807	0.00324985921066155
Pam16	-2.27880592303312	0.0241578516704123
Pank2	-1.30308127932605	0.0442901295484406
Pank3	-4.23128678981001	4.42933310341864e-12
Papd5	-1.35265503719492	0.020575919358651
Papola	-2.66423354183328	6.5974834183687e-06
Papolb	-3.97548953963305	2.47696136983757e-07
Parg	-1.74003011383129	0.0340120735706119
Park7	-2.13853316539173	0.0167129639256911
Parp2	-3.47556312729506	2.73250251463636e-08
Pask	-2.45567903611576	0.00281053861787668
Pbk	-2.15988561845866	0.00281255689957053
Pbx4	-2.7118282878055	0.0386353723872995
Pcdh19	-4.58421633145187	0.000126630196320842
Pced1a	-4.81343078318502	0.000559061792507632
Pcf11	-1.78428521713095	0.0307511730533201
Pcgf5	-3.21857233602526	1.95233238371148e-08
Pcsk7	-4.06079846699668	0.000117292295055721
Pcyt2	-6.35674819277212	1.43824239420809e-07
Pdcd10	-3.32896134696172	0.00235376051309884
Pdcd11	-4.33859186170795	1.74732292295112e-06
Pdcd2	-3.90981957577963	4.05657267671067e-08
Pddc1	-3.6650638887509	8.35807536790897e-05
Pde12	-2.7614527678663	0.000132940969715579
Pde7a	-3.7573041510712	0.0110723119990803
Pdf	-4.55253300547226	7.4986763887642e-09
Pdha1	-2.14729534470601	0.0043872736899129
Pdhb	-2.99786858928754	2.60238763057609e-07
Pdp2	-4.98662955246813	0.000456658733227638
Pdrg1	-1.92622088155342	0.00177188285072244
Pds5a	-2.62506655393194	0.00174669259695026
Pds5b	-2.05205983821498	0.00145797585863031
Pdxk	-7.03669943238621	4.13959990766002e-10
Pdxp	-1.43094613286292	0.0146406629168429
Pdzd11	-1.95456865739693	0.00235411633371339
Pemt	-1.75398134860938	0.00495094777276429
Peo1	-3.14101907101437	7.05611973505283e-06
Pepd	-3.52529754464112	0.00963390578052682
Pex16	-2.9981913145467	0.0102631887309446
Pfdn6	-4.06092336720373	5.75343313218096e-06
Pfkfb3	-2.86647443296194	1.77254612010014e-05
Pgam1	-1.39033965881868	0.0169377597042529
Pgd	-3.88667058287996	0.000138617052568856
Pgp	-5.72024096484191	1.30411643227856e-06
Phax	-2.10530955621807	0.0430124177974662
Phb2	-1.73196742914425	0.0159020083576266
Phf20l1	-2.09479274498861	0.0192692505859654
Phgdh	-2.9286640744797	0.0194450173757585
Phkg1	-3.07827517927279	0.0143428998665167
Phlda1	-3.47866361355369	0.0041579118849922
Phrf1	-4.56728507503676	2.46255633680701e-11
Pi4k2a	-5.30923914038159	7.16612304452488e-07
Pi4k2b	-3.38676277782596	5.45246425003622e-06
Pi4ka	-1.93449199440226	0.00313018622794961
Pif1	-3.4269983485865	2.50089281906631e-06
Pigh	-3.00239824702519	0.0181700223202214
Pigm	-1.82703656552392	0.0157109340434447
Pigyl	-2.97396737258278	0.00867860025148906
Pik3cb	-1.78641753086901	0.00659392090681865
Pim2	-1.27161177238102	0.0491371818856454
Pim3	-5.13883173403928	7.15658827402475e-12
Pin1	-5.13651196017066	3.56777559941644e-10
Pin4	-3.87975812508557	3.34890244318634e-05
Pip4k2c	-1.77168780551363	0.039316574811878
Pitpnb	-4.55825664156648	4.47197543352668e-12
Pitrm1	-2.29228918388568	0.00226343081453858
Piwil2	-3.17892160833837	6.57179737917942e-06
Pkd1l2	-4.14555486367345	0.0129965726896338
Pkn3	-4.01682085316674	0.0379421550365183
Pknox1	-4.84957859544425	8.44717223794529e-05
Pla2g15	-1.58621078777163	0.0205078055121141
Plac9b	-8.80843337608156	2.9523957653076e-07
Plch2	-6.79692552750297	3.26359977432031e-08
Pld6	-6.57552628468786	4.79524609103846e-06
Plekhf2	-4.63176769010407	8.00964742576566e-12
Plekhg5	-4.57984315248898	1.76941133444978e-08
Plekhg6	-7.43670095636861	1.09028979580886e-07
Plekhh1	-3.81283006333939	0.000479534068989391
Plekhm3	-2.84973269893142	4.4512316785216e-05
Plekho2	-3.9670356079701	0.0010077326954176
Plk3	-3.45687973012794	0.0481590080688232
Plod3	-4.45024683420674	0.000351170170185141
Pmaip1	-3.58581834394171	0.00638884635666389
Pmfbp1	-2.52899013441219	0.0365332074626042
Pmm1	-2.75338259731268	0.000798494470288216
Pmm2	-4.67131384150145	0.00750038779749504
Pmpca	-4.73061758490604	4.52094159211233e-05
Pmpcb	-2.1427888392283	0.00267446566508661
Pms2	-3.5230519539009	3.26797584127887e-05
Pnkp	-7.26822696650234	0.00307119051173053
Pnldc1	-5.32285727487583	2.2917815510579e-11
Pno1	-1.31736216707592	0.0494139391428578
Poglut1	-3.58485263211735	0.000273232470064733
Poldip3	-3.66111696180547	1.97335325381883e-09
Pole	-4.59037917241847	5.15731818570732e-11
Pole3	-2.35766288921285	0.00630188955898463
Polg2	-3.84306614616184	0.018133990313137
Polq	-2.68813609268272	3.70832877593167e-05
Polr1a	-3.02911426893428	5.03761268810593e-05
Polr1b	-4.58872493805856	7.21641504530317e-10
Polr1c	-3.68728375466604	4.29483753837345e-10
Polr1e	-4.15398678576941	7.0126606765006e-09
Polr2a	-3.36841996547973	1.19406300295872e-05
Polr2b	-2.94436849802535	1.49090668916128e-06
Polr2e	-3.4536320622474	3.05499523756633e-07
Polr2i	-2.50532185763225	0.0447382820565808
Polr2k	-4.73531382226527	0.000648845589474754
Polr2l	-3.99107511109157	0.000309116242836206
Polr2m	-2.14418068224425	0.00388556330242031
Polr3a	-2.66148564159824	1.28104551815346e-05
Polr3d	-1.33546568777753	0.0344609557275133
Polr3e	-5.01709098465649	4.09271220604075e-08
Polr3g	-3.88390254133064	4.94070751547956e-09
Polr3h	-1.72933900765816	0.0124994113233863
Polrmt	-4.87966594916596	0.00289210630349337
Pomc	-5.34471785750723	0.00872350679574898
Pop5	-1.87032781807226	0.0303585086038463
Pop7	-3.03616811981506	0.00427007818849387
Porcn	-2.55665595210724	0.0281686396830964
Pou2f3	-6.10632653217949	0.0015480490984628
Pou3f1	-6.90446650648199	3.91407401130139e-05
Pou6f1	-5.6078091183716	4.8542868962306e-05
Ppan	-2.32596477858829	0.01177774234955
Ppat	-4.20413021751585	7.9380321685551e-12
Ppcs	-3.93439591804125	0.00141716068742932
Ppia	-1.80464875286122	0.00163982725976035
Ppid	-2.99745456223634	4.60887859283147e-06
Ppif	-2.82579362236214	0.000301740504523804
Ppig	-1.81570188151011	0.00255266513119056
Ppil1	-3.79877836111347	2.68130450189719e-07
Ppm1g	-4.79499458688233	1.86032648843897e-07
Ppp1cc	-1.70459565174868	0.00213473771112771
Ppp1r12c	-3.60722275807284	0.000363495626986369
Ppp1r13l	-5.13325655416913	0.000870467511371323
Ppp1r15a	-2.19063453348893	0.00528137588615174
Ppp1r15b	-2.77840856616455	5.3037291560833e-06
Ppp1r16a	-7.60605545489962	3.23532540058328e-08
Ppp1r2	-3.05099211702876	0.00629975266331862
Ppp1r2+AC0-ps3	-2.67753146318556	0.0480372694334446
Ppp1r2+AC0-ps7	-8.82109517577413	5.05283822691116e-12
Ppp1r3f	-4.04164416307539	0.00931474467508039
Ppp1r8	-2.83433387201596	1.38295440795479e-06
Ppp2cb	-4.92686848076554	1.55467728731183e-11
Ppp2r5e	-1.73213687126709	0.00226610082957381
Pprc1	-5.17349208795558	4.49618741375202e-13
Pqbp1	-4.27643407230444	0.0183223312858567
Pqlc2	-7.47915634131709	4.11169980840388e-07
Pradc1	-1.81604063555101	0.00482592920440929
Pramef8	-1.54955346335327	0.0240502782711572
Pramel3	-6.03144018264435	2.49402747955939e-07
Pramel4	-3.75435960219725	0.000217198089926219
Pramel5	-4.30258676075932	4.01855079984461e-09
Pramel6	-5.22218155037718	3.78303428857376e-12
Pramel7	-4.52898966980122	9.65772367853204e-09
Prc1	-1.73736570365033	0.00333128917657083
Prdm13	-4.5781270854492	0.0278531637542261
Prdm15	-4.32252098960732	6.62736613280534e-08
Prdm4	-1.3174211875938	0.0450976563649465
Prdx4	-3.88301795238607	1.37710373469976e-07
Prdx6	-2.81480888181861	0.00277727883281022
Prelid2	-6.58872502602371	5.09550522472742e-17
Prim1	-2.26547218268515	0.000252513059269738
Prkcd	-3.78908236469575	1.27551241473511e-06
Prkcg	-3.99873232028828	0.000798998251688755
Prkcz	-2.70965739931888	0.0474741135293302
Prkrip1	-3.07682157547661	9.18055770399697e-05
Prmt5	-2.77993464754071	0.000396924334546903
Prmt6	-4.69794263504601	2.81176158487556e-12
Prnp	-1.82836308583954	0.00182755509969728
Prorsd1	-2.76881330979225	0.00477338193085628
Prosc	-3.3398226225955	4.60526490776222e-07
Prpf19	-1.61984025633588	0.0433464716050534
Prpf38a	-1.75334354208873	0.00135427813758098
Prpf39	-1.8161117963225	0.0164701901812849
Prpf4	-3.43884490199714	1.01945667129268e-07
Prpf40a	-3.54961851429942	1.1400039861694e-07
Prpf4b	-3.51508380354863	3.27581458324595e-06
Prps1	-5.59984283193543	5.21614545639078e-18
Prps1l3	-5.77349377872285	4.11449835158928e-17
Prpsap1	-1.99203688674274	0.00104308470564088
Prr11	-3.36147711489442	4.21326374729066e-08
Prr13	-1.71698829899517	0.00476497565975068
Prr18	-2.08507010524473	0.0379764820307649
Prrc2c	-1.44185730212006	0.0153453604010104
Prss8	-4.05770612975486	0.0114241281753459
Prtg	-2.34895365616985	0.0494039204674579
Psat1	-4.67881676462087	2.35015738992484e-12
Psma3	-3.6576402751616	1.75352790933603e-08
Psma4	-2.99364638721221	1.55803684280547e-06
Psma6	-3.14128489208258	0.000182292505010897
Psmb1	-4.58996089212416	6.42679305247382e-13
Psmb4	-2.49531615540825	0.000130451761712058
Psmb5	-4.59774241351623	4.33074739282323e-10
Psmb7	-1.68583902421522	0.00651283381895791
Psmc3ip	-4.48390784627992	3.85082135994999e-09
Psmd12	-2.44250657344048	0.000258147044608237
Psmd13	-6.56670101244317	0.000291213484454509
Psmd14	-3.43811701042147	6.83653538867553e-08
Psmd5	-1.10413329560117	0.043241109197494
Psmd6	-1.96292105611708	0.00250700103466657
Psmd7	-3.56495421658022	4.82150179928218e-08
Psmg3	-2.17670425487136	0.0433461803980018
Pspc1	-3.01922783675453	0.0116853319279228
Ptcra	-2.28847990055076	0.00958964468298572
Ptdss2	-2.11360980489338	0.00156373179853452
Ptger4	-2.2218311765698	0.00214557966879339
Ptges	-3.91720772743242	0.00026521665603171
Ptges3	-2.79708643527997	1.91315081573238e-05
Ptma	-3.09764142785669	1.19110962095045e-07
Ptplad1	-2.33477716486375	0.000716275698135238
Ptpmt1	-3.28866893947447	6.72918830049324e-06
Ptpn1	-5.03633804431644	3.32035358412071e-09
Ptpn2	-1.50980101443137	0.00953312389528771
Ptrh1	-9.80272561336582	1.72314124124565e-09
Ptrhd1	-1.97841254119081	0.0495732948897606
Puf60	-3.31970827578729	1.20434265003827e-07
Pum1	-2.74134617881287	9.09013379237544e-06
Purb	-5.19666574611103	6.22947683533383e-17
Pus1	-4.96608686737857	4.48605398666009e-05
Pwp1	-3.82604869960246	1.42080850072486e-08
Pwp2	-2.0804085209415	0.00441156578726549
Pwwp2a	-2.88010011971209	7.72087436578417e-06
Pygm	-2.6930097759232	0.00418167451735584
Qpctl	-3.7649420862025	0.00618727429345792
Qrich1	-1.83697047368849	0.0109089469390874
Qrsl1	-2.44335422423491	0.00737962246060428
Qsox2	-5.12919972084982	4.91753509415366e-05
Qtrt1	-2.7375252660637	0.00190945767175869
R3hcc1	-9.4208792043802	1.98917834106713e-05
Rab1	-3.34544218078072	3.88972718506825e-08
Rab10os	-3.39506038588548	0.000166871975484491
Rab11b	-1.52829131981596	0.0494384667003571
Rab11fip5	-2.61354664668897	6.0184192655061e-05
Rab26os	-4.51400249926787	0.000140590361664389
Rab2b	-2.14751308449926	0.00326033012312571
Rab33b	-1.26933685644927	0.0291729234143336
Rab34	-1.94047402154729	0.00228262451780161
Rab39	-8.08321642723739	1.95795975517122e-05
Rab3ip	-2.57244950950553	0.000762705172817651
Rab40b	-4.32773171780489	4.05418364008775e-05
Rab40c	-5.39757470360874	1.64730186509843e-05
Rab43	-6.93654323408646	5.37312091857898e-08
Rab5a	-2.85482430160598	7.00755627013463e-07
Rab5b	-3.12543813280198	6.35399649494639e-06
Rabgap1	-2.04769472654712	0.00127467024346554
Rabgef1	-3.41629260728998	3.80509266649761e-05
Rad21	-2.01215566610714	0.000447288094786166
Rad51ap1	-3.10904608894476	0.00017134261977229
Rad54b	-2.72819089914664	0.0055443173129723
Rad9a	-6.25064594142753	4.92156066288475e-06
Rae1	-1.04820683260586	0.0420849901972158
Ran	-1.7052188026216	0.00351317594309616
Ranbp1	-2.00133420037543	0.000333077025339654
Ranbp10	-3.68492747257804	2.45722756017291e-08
Ranbp2	-2.78340870960175	3.49040157457813e-06
Ranbp3	-1.72928727072527	0.00700096717234565
Rangap1	-5.11599238844106	4.80635180571308e-13
Rarg	-6.4320899075313	2.42212027923515e-14
Rars	-4.456541896987	4.99355234422581e-12
Rasd2	-3.98776468280311	8.45246209862303e-06
Rasgef1c	-7.93485173498712	0.000135900286577167
Rasl10a	-3.56033734586632	0.00469527916640724
Rbbp4	-1.33324465443496	0.03372093200151
Rbbp6	-4.05609619369118	2.36908640536344e-12
Rbm10	-4.06187916391558	9.365418980711e-11
Rbm12	-2.53427834850414	0.0109089469390874
Rbm15	-4.13174164414397	6.69619274974671e-12
Rbm25	-3.5918140909289	4.26624375758418e-05
Rbm28	-2.00098555047435	0.000863725475531422
Rbm34	-4.07123653467387	1.59454913156755e-08
Rbm3os	-3.02918684572723	0.0119775576734929
Rbm42	-2.58999952699161	8.66297039987103e-06
Rbm5	-4.35645362250198	4.13763960799685e-13
Rbm8a	-3.39276824007004	1.11998836175101e-08
Rbmx	-3.72231553474575	2.9249045329785e-10
Rbmx2	-3.60526508168966	1.77585318506261e-08
Rbmxl1	-4.51606644686063	1.47674145438861e-05
Rbp7	-2.91214002649985	0.00885072752040525
Rc3h2	-3.14153645848345	3.58488623748583e-05
Rcl1	-1.7096137115289	0.012561407524481
Rcor2	-1.86792625050014	0.0104078611865415
Rd3	-4.13969145700663	0.00691998517572983
Rdh16	-3.66483018579733	0.00298481167380045
Rdm1	-3.61024849606853	7.31605214036922e-07
Reep4	-2.02975093795206	0.00539159340279087
Renbp	-6.57800471360269	8.62788004317432e-09
Rer1	-1.92501536103793	0.00698168008355547
Rev1	-2.18422418995561	0.0418161466185762
Rexo4	-3.55579221212189	2.62843038621714e-07
Rfpl4b	-7.43228270382891	7.12937574288793e-18
Rfwd3	-1.59558604939328	0.00372246404950464
Rgl2	-1.75889571415534	0.0391352669799716
Rgmb	-2.95126624296193	0.00286097407860385
Rgs11	-7.44966614258546	6.44330498618498e-10
Rgs18	-3.42023380488363	0.00495094777276429
Rhno1	-1.42108308663062	0.0302190232161665
Rhoa	-1.3152367846867	0.0222445600020512
Rhobtb2	-2.23532038100116	0.0364381727836223
Ribc1	-2.01261563743534	0.00108872456802787
Ric3	-4.93102193631309	1.78017662908226e-09
Rilpl1	-2.93211535287739	0.00397503026516271
Rilpl2	-3.680226085233	1.18925767676257e-06
Rinl	-6.1436805031851	1.71782172342371e-08
Ripk4	-3.41652073449831	0.00066544311429493
Rlf	-5.12870836978528	1.12900460465315e-14
Rmnd5b	-2.54853986990902	1.64184700128304e-05
Rnf103	-4.09959072572414	2.80751154319813e-06
Rnf11	-7.02313989809589	3.56466382777257e-08
Rnf115	-2.29625110685155	0.000373259527108885
Rnf125	-3.61826207923187	1.06052105893921e-05
Rnf135	-2.10161613788312	0.0229811056978863
Rnf149	-2.60503494355378	0.000817652563830627
Rnf157	-Inf	2.42610326785275e-05
Rnf167	-2.19225790900749	0.000763618921286073
Rnf20	-1.62884840416024	0.0127281824084236
Rnf216	-3.38977058011147	4.94359469033215e-07
Rnf223	-5.29898723052615	0.00652111354906329
Rnf41	-2.14943132793538	0.0109682467504947
Rnf44	-1.87336619300496	0.00209781907566403
Rnf6	-3.84255186612546	2.16890568443501e-09
Rnf7	-3.76769862217234	5.29555958947042e-10
Rnf8	-1.48875384775185	0.0231217420234634
Rnpc3	-3.69657348991351	1.43579486357238e-06
Rpa2	-2.56747449735979	8.11362185193108e-05
Rpf1	-1.85040631639432	0.0163369262493049
Rpf2	-4.68534141938286	3.14392453023799e-07
Rpl10	-1.56993196844218	0.00789341032775947
Rpl10a	-2.67029213322555	6.42166622650231e-06
Rpl10l	-7.05544588535189	1.6953435230966e-22
Rpl11	-2.00705435248483	0.000361371044010841
Rpl12	-2.79167158441656	2.86879798689178e-06
Rpl13	-2.42860736258163	0.00227236476727776
Rpl13a	-1.85026297416699	0.00265582370801892
Rpl14	-3.40934838198668	0.0190862632530497
Rpl14+AC0-ps1	-3.4758768447973	0.0164463598938089
Rpl18	-2.47529781074747	0.00770561160959216
Rpl18a	-3.68493255473586	0.000135611286129375
Rpl19	-2.5384619028951	0.00394124591886121
Rpl21	-2.31172952767158	4.42756247030902e-05
Rpl22	-1.33182921347098	0.0287941712824386
Rpl23	-3.09656944617902	1.1361344847178e-07
Rpl23a	-3.21404068003242	9.91171810129486e-07
Rpl24	-3.00958515325626	1.34958363012078e-06
Rpl27	-2.33257311843397	0.0258881876563336
Rpl27a	-2.58664261188267	0.000100579248207371
Rpl28	-2.7930938542581	0.00231466071904689
Rpl31	-1.69160725117636	0.00860802269616081
Rpl31+AC0-ps12	-2.00843077481409	0.0147191935998285
Rpl35	-3.16656023320015	9.88188207652447e-06
Rpl35a	-3.03932201117284	1.42265853853797e-06
Rpl36	-4.49867668001825	0.0170630407863672
Rpl36a	-2.86386236654192	0.000186606786410512
Rpl36al	-3.82681506264548	7.97582858953165e-11
Rpl37	-2.11078836484548	0.00309682402291442
Rpl37a	-1.73646833081713	0.0211811724509414
Rpl38	-3.14252039103945	0.0350865873085394
Rpl39	-3.72077463490516	8.54811030539232e-06
Rpl39l	-1.6210095388213	0.0145061598210309
Rpl3l	-4.64951455051966	0.000736008291743619
Rpl4	-2.00252347148132	0.000381474059490969
Rpl41	-2.87533505135957	8.30584302801223e-06
Rpl5	-1.14747334308402	0.0449115495791354
Rpl6	-2.62694412730928	4.23352978588815e-06
Rpl7	-2.46284796580683	9.18055770399697e-05
Rpl7l1	-2.76184874490056	3.18279293393681e-05
Rpl8	-2.74660721423278	0.000704120079054625
Rpl9	-2.73963986863961	8.83483370703339e-06
Rplp0	-2.53037147457635	0.0149184039203696
Rplp1	-4.88958374518078	0.00235452958392409
Rpp14	-1.57788368215208	0.0032772808665973
Rpp25	-4.53564568280803	4.78491181233026e-09
Rpp38	-2.65954864939866	0.000962454396800743
Rpp40	-4.16552807129989	3.90932956361688e-07
Rprd1a	-1.51439797942966	0.00558388205400235
Rprd1b	-4.76832088863137	5.59263856489094e-13
Rps10	-4.22978959662196	0.027256429115427
Rps11	-2.71165642429386	1.75895033868267e-06
Rps12	-1.31390270875063	0.020143977981976
Rps13	-3.7370582401412	8.01155925379935e-10
Rps14	-2.06312806373299	0.0218907546837704
Rps15	-3.23850762627709	0.000816665747080745
Rps16	-1.42113502984824	0.00939582077025047
Rps17	-2.84124922641855	0.00267075198828993
Rps19	-2.67276265738689	0.000362305208082543
Rps19+AC0-ps3	-2.2412552857742	0.032928488379703
Rps19bp1	-3.57004575561867	1.77254612010014e-05
Rps20	-2.18072716334795	0.00101464935067643
Rps21	-2.5952082472652	0.0167412954814298
Rps23	-3.36291663816162	1.39408031106233e-07
Rps24	-2.23424101489488	8.3564114769181e-05
Rps25	-3.03421807798896	3.43341246705587e-07
Rps26	-3.87230210721979	0.000133221664714454
Rps27a	-2.42942207997354	0.000624837249571819
Rps29	-4.70137101055802	0.00204265031777294
Rps3	-2.47819526423878	3.2142357108118e-05
Rps3a1	-1.76362800211447	0.00307921016626943
Rps4l	-2.6880649444804	0.00154916010865749
Rps4x	-2.57206764353272	1.1997717079441e-05
Rps5	-2.64726032670697	0.000821049580988896
Rps6	-1.90251885953439	0.00113975367076581
Rps7	-2.27906922027211	4.18045736799229e-05
Rps8	-3.09784917538202	1.77956690844584e-07
Rps9	-2.3061662209765	6.68615115665046e-05
Rpsa	-3.03730290584657	0.00161035407545312
Rpusd1	-5.71703030718774	0.000194061887486065
Rpusd2	-2.53839659699898	0.00180670721934805
Rpusd3	-2.64871817491388	0.0155021794983475
Rrm1	-1.88279762481252	0.00441156578726549
Rrn3	-2.86962055619722	3.84897306418703e-07
Rrp1	-1.75548603801078	0.0145394146628621
Rrp12	-3.65771440024173	7.46212659623859e-08
Rrp15	-4.80986533151142	0.00806849907016181
Rrp36	-4.45222467653098	0.00207215449109741
Rrp7a	-2.86294348757045	0.00584533294501446
Rrp9	-5.41177529522255	1.09552914238627e-07
Rrs1	-3.55269399800044	1.48666973754526e-08
[truncated: 750 more rows]

## Sheet: Table1-sup1_Stable-2Cell
gene	log2fc	pval
0610009B22Rik	0.552878911287569	0.558172480128545
0610009L18Rik	3.55333235108285	0.213907918210675
0610009O20Rik	2.09188473277663	0.209313242346642
0610010F05Rik	-1.18936841109106	0.20085580092619
0610010K14Rik	-1.33553809531143	0.0508649083378543
0610030E20Rik	-1.39387385301554	0.223543593097132
0610031J06Rik	-1.52063964275508	0.322038937109698
0610037L13Rik	-1.00215872922787	0.304780498397623
0610040B10Rik	-2.80190204033987	0.0765749167519117
0610040F04Rik	0.070829060532859	0.976899930307064
0610040J01Rik	-1.21136796323323	0.0773176363536304
1110004E09Rik	0.642652519834294	0.262563706039236
1110004F10Rik	0.429101127877926	0.71379470223861
1110008L16Rik	-0.87506090698817	0.249398308098739
1110020A21Rik	-1.78463280819093	0.269387516542377
1110028F11Rik	-1.78725996179281	0.155940293957172
1110032A03Rik	-0.334459921863867	0.888316168848839
1110038B12Rik	-1.70331618169049	0.118018487486063
1110038F14Rik	-0.972460897718977	0.187105948918345
1110057K04Rik	-0.792645284026273	0.502920388840436
1110059E24Rik	-0.157388495354089	0.959433822214985
1110059G10Rik	-0.00923711739473973	0.971375443778732
1190002N15Rik	-0.460040710637333	0.660237514902365
1190005I06Rik	0.428879123967464	0.587125035814354
1200014J11Rik	-1.19081022588094	0.0648949156870828
1500012F01Rik	-1.40421854755624	0.0581843175222375
1500015A07Rik	-0.167182745457946	0.839658787985175
1600010M07Rik	-2.88854147392678	0.0580939783969878
1600029O15Rik	-1.15126882498258	0.372857601020951
1700001L19Rik	1.74906105473652	0.131132405294337
1700007J10Rik	-0.0416530784905084	0.933041033352419
1700008J07Rik	-2.22084297155355	0.0528511832267673
1700010D01Rik	-1.04631606339155	0.19944599568583
1700010I14Rik	1.86909798290701	0.159061439505357
1700017B05Rik	-0.760155991749376	0.367666145166711
1700018B08Rik	-0.262587503430471	0.845046788611198
1700018B24Rik	1.72408952888898	0.130061952226066
1700019G17Rik	-0.489897847517628	0.647346026768632
1700025G04Rik	1.12217921892535	0.323338528447385
1700025N23Rik	0.140916702271044	0.942813491761171
1700030C10Rik	-1.22563193532469	0.352470390291734
1700030J22Rik	1.44331808054841	0.0592423406958121
1700030K09Rik	1.26787510930782	0.324313216825998
1700030L20Rik	-0.680965568544914	0.35270180747444
1700037H04Rik	-0.554367183174063	0.443430865966845
1700042B14Rik	1.15228624562148	0.155679138347004
1700047E10Rik	-0.264278317829803	0.877656116613024
1700048O20Rik	1.3435814607855	0.0938666306692938
1700049G17Rik	0.866902551401616	0.478284318990665
1700052N19Rik	-0.890650223244517	0.651722029849151
1700063D05Rik	1.08375619951564	0.413392497429731
1700066M21Rik	-1.17267453921817	0.098749805543798
1700086O06Rik	-2.91705514547145	0.0780971701930826
1700091H14Rik	-1.55173405100517	0.164395308415964
1700093K21Rik	-1.19715192722521	0.135413338741435
1700094D03Rik	-0.675574806632406	0.419681354970582
1700113A16Rik	-0.710280007543306	0.556544173188978
1700123I01Rik	0.558395033926575	0.702091655444789
1810010H24Rik	0.562228209828679	0.70728849737734
1810019D21Rik	-2.35221604431943	0.136888799344137
1810022K09Rik	-0.529867837571757	0.712436079795459
1810030O07Rik	0.570497606396426	0.443149411594409
1810032O08Rik	0.40457828375162	0.891467648726129
1810041L15Rik	0.10089624062434	0.900034369520571
1810043G02Rik	1.72075958951924	0.0712956637923515
1810055G02Rik	-0.837651319647531	0.145667494391171
1810058I24Rik	-0.954832623844772	0.165697045124064
2010005H15Rik	1.24803847308153	0.326942927404547
2010012O05Rik	-1.98048989141591	0.0869679637620286
2010015L04Rik	-0.718038211307946	0.480866670251255
2010107E04Rik	-0.76651956389376	0.257624122354062
2010111I01Rik	1.47080290072172	0.121550545612897
2010315B03Rik	0.420979878482574	0.866803587954718
2210015D19Rik	1.81422060682256	0.121702869641917
2210018M11Rik	1.46333900386755	0.305813067753335
2210409E12Rik	-0.839657190535392	0.19882090288302
2210414B05Rik	2.65889483867217	0.239861368550712
2300002M23Rik	-0.600372071853464	0.564094760349437
2310009A05Rik	0.433930586808815	0.696966187502482
2310015B20Rik	1.62626295473023	0.359225483060335
2310022A10Rik	-0.0458534931180154	0.965745328577764
2310022B05Rik	-0.352374711695732	0.844084553261029
2310035C23Rik	1.13316590390878	0.143190313780813
2310039L15Rik	-0.603342417445454	0.446837939413614
2410004N09Rik	-1.75614378508752	0.373252193493277
2410006H16Rik	0.486426363456377	0.600948094276544
2410018L13Rik	-0.545303985773824	0.435483831283834
2410021H03Rik	0.295318843363446	0.750201452414134
2410089E03Rik	-1.08677045954633	0.103600691561581
2410127L17Rik	0.376463025842317	0.420895346254894
2410131K14Rik	-0.565820556818566	0.734527868891131
2410141K09Rik	1.13401696010791	0.455642127335926
2510003E04Rik	1.14350640538861	0.0912053261331666
2610002J02Rik	1.02399702168428	0.219461290863539
2610002M06Rik	-0.364903772319884	0.842988394037981
2610015P09Rik	1.69407837576349	0.295441667711845
2610020H08Rik	-0.88162175673042	0.359212987048533
2610034B18Rik	-0.236005000141895	0.942106272479324
2610034M16Rik	-0.468808875551821	0.89756116510479
2610037D02Rik	0.0118270795612456	0.835103993835387
2610044O15Rik8	-0.0193350927422255	0.945499166691806
2610203C22Rik	5.38037490241335	0.100535400863115
2610305D13Rik	0.274547321568674	0.798086470155628
2610507B11Rik	-0.944628413595133	0.208024508380306
2610507I01Rik	0.705694670945792	0.290597599498299
2610524H06Rik	0.726305016148751	0.247985820677019
2610528A11Rik	0.949401628466645	0.564034275708618
2700054A10Rik	0.389865894652216	0.812964060184435
2700062C07Rik	-0.641147713064277	0.293404669973982
2700097O09Rik	-1.02653244245193	0.153175583219964
2700099C18Rik	0.759247826042087	0.234766528851428
2810001G20Rik	2.22237713005087	0.221681707503598
2810403D21Rik	2.32675577129496	0.0839052736975295
2810474O19Rik	0.749730804122861	0.211001184238141
2900026A02Rik	0.925801371684884	0.167069283276092
2900057B20Rik	0.479092001408636	0.732789328771425
2900092D14Rik	-2.86701170194643	0.0590579228443762
3000002C10Rik	0.384364254497406	0.617431792989506
3010026O09Rik	-0.70505636993332	0.22544488273412
3110007F17Rik	1.07777111932671	0.48834898441088
3110045C21Rik	0.42558675392975	0.69548487366837
3110052M02Rik	-1.40343274475669	0.162285049882701
3110057O12Rik	0.233417716124156	0.758307791270516
3110082I17Rik	0.995083863762985	0.194631901104616
3830406C13Rik	0.627673806759092	0.410694061367866
4833427F10Rik	-2.05497868018001	0.247675707778435
4833439L19Rik	-0.172482180272333	0.937508699141294
4921507P07Rik	-2.51739944086292	0.0869583850324297
4921517D22Rik	1.98958071999506	0.596500097308005
4921529L05Rik	1.73589445229975	0.307159588138105
4930402H24Rik	-0.657496768060133	0.31447179007843
4930404A10Rik	-1.58967818544229	0.246947769474958
4930417O22Rik	4.72680525437214	0.126338280770265
4930432K21Rik	-1.15227345604011	0.183016679354151
4930451C15Rik	-1.09028660897241	0.398004494933318
4930452B06Rik	0.202510037066628	0.913724701998622
4930453N24Rik	-0.710056725841119	0.312121454916499
4930470H14Rik	3.29389940759303	0.0614351453057386
4930473A02Rik	-0.36932158308687	0.937990344477418
4930503E14Rik	1.18157935084107	0.0595632552248121
4930511M06Rik	-0.0978071139611163	0.821522398179896
4930513N10Rik	-1.16421831267694	0.142486032958899
4930515G01Rik	1.92420724717857	0.0878048557145259
4930519G04Rik	0.970675776690567	0.536943779687589
4930525D18Rik	-2.55189161860552	0.142092303322175
4930528D03Rik	-0.484911737202829	0.56848321552244
4930538K18Rik	2.57622270788883	0.595673968704945
4930539E08Rik	0.382090481709596	0.608713166394787
4930548H24Rik	-0.806836311287812	0.561163895483809
4930555G01Rik	1.41422156347134	0.277035786117576
4930556J02Rik	Inf	0.10409475303427
4930572O03Rik	-0.757538483535281	0.654645254679104
4930579F01Rik	-1.04810300038264	0.645857594660312
4930579G24Rik	-1.65148594392571	0.127689147257521
4931406C07Rik	1.09861719771591	0.0976730213500458
4931406P16Rik	0.906336964482093	0.105214987186803
4931412M21	1.20887872611281	0.257589670193912
4932411N23Rik	-5.12091637105309	0.227461886964082
4932416H05Rik	-3.25273451863065	0.146802184358731
4932438A13Rik	0.192393439812014	0.784094719552476
4933402N22Rik	1.91275978658077	0.149580943258053
4933405D12Rik	1.19656167906076	0.288197070219452
4933406C10Rik	3.57436659535432	0.369414469594391
4933408B17Rik	-0.296131220680606	0.927884890157434
4933408N05Rik	1.43758487636831	0.155835857637822
4933411G11Rik	-0.527324716384211	0.383860570165489
4933412E12Rik	4.34234115094455	0.142759823536492
4933413J09Rik	3.1024615611874	0.209760457992436
4933416E03Rik	3.10595950349859	0.0733982281100237
4933416M07Rik	5.12074246233918	0.192110848919206
4933421O10Rik	-1.19225924399079	0.062596138531036
4933424G06Rik	5.79520873147046	0.311472102363667
4933427D14Rik	-1.89348769479079	0.191151455350935
4933431E20Rik	0.789607532315209	0.485229519466274
4933432K03Rik	1.78569633634001	0.0720146908907751
4933434E20Rik	0.167401484388188	0.70653784284236
5031410I06Rik	0.254046434857964	0.851050428451316
5430402O13Rik	-1.19014167576186	0.616531514555212
5430405H02Rik	-2.75678218784979	0.0891946221515348
5430416N02Rik	-1.02863563256186	0.178370501329734
5730507C01Rik	-1.03481704327291	0.20085580092619
5730508B09Rik	0.519033105732169	0.659987191155282
5830416P10Rik	0.115994727972767	0.990598811404524
5830418K08Rik	0.491911216133442	0.676485448497938
5830418P13Rik	2.4763766518901	0.164743925249185
5830444B04Rik	-1.43692482914525	0.411709154036283
5930438M14Rik	0.284735590914161	0.820397726390585
6030408B16Rik	-1.65903755730194	0.362805415475616
6030443J06Rik	2.01255511937565	0.129646065281146
6030458C11Rik	0.0244000156545528	0.94254624301851
6330410L21Rik	1.55528486019601	0.278189779649407
6820408C15Rik	0.650391156963394	0.831326016829154
7420700N18Rik	1.40765418626026	0.388132101814445
8030423F21Rik	-2.27961718688415	0.137805635740382
8030462N17Rik	0.158553532189404	0.887203667946963
8430419L09Rik	1.68108646747384	0.255837257308085
8430426J06Rik	-0.615029744200866	0.388689054779624
8430429K09Rik	0.156148460630512	0.866421211329562
9030025P20Rik	0.106346403521854	0.919786890244488
9030624G23Rik	0.402222380714992	0.634330715030048
9130011E15Rik	1.23353817904539	0.134129484529384
9130023H24Rik	-0.12935138991484	0.755103140145509
9130024F11Rik	0.61670001240656	0.718363880877281
9130221F21Rik	-0.838479495283947	0.389246406437209
9130227L01Rik	-0.642872770901003	0.684961079382869
9230114K14Rik	-0.797771121658418	0.586818122963989
9330102E08Rik	1.07686729209157	0.145430641403693
9330133O14Rik	-1.37261720426446	0.3700742876605
9330151L19Rik	-0.754415220633942	0.89815500884027
9430015G10Rik	-0.355143470536369	0.560547300755064
9430020K01Rik	-1.42623530318714	0.397320338698818
9430021M05Rik	0.740449733605676	0.557436181818739
9430037G07Rik	-2.2048355896845	0.0801924964378918
9530026F06Rik	0.770243111139077	0.23773221534023
9530051G07Rik	1.37853519837504	0.500154884227786
9530068E07Rik	1.17121340984324	0.0780465958598712
9530077C05Rik	0.313444795051281	0.867252978562498
9530091C08Rik	0.912728428058359	0.171679302090356
9830107B12Rik	-1.71402623314359	0.0599176029457862
9830132P13Rik	-1.46823581144595	0.166337276568684
9830147E19Rik	-2.16011760537755	0.261808433970118
A130010J15Rik	0.327377279659851	0.828795132443929
A130077B15Rik	1.05026409610422	0.569413282705524
A230077H06Rik	0.544447446135814	0.782999807485368
A330032B11Rik	-0.56863031613712	0.502247106893133
A330069E16Rik	-1.04779154293626	0.315404842771074
A430005L14Rik	-1.00423329586495	0.165775928523904
A430089I19Rik	3.98623561097805	0.0805148750185767
A430093F15Rik	3.39687594521294	0.0502605595395434
A4galt	1.3838587920946	0.360085112365064
A630089N07Rik	2.10085535465419	0.0832307378315751
A730017L22Rik	0.0329526150914665	0.985948250827367
A730082K24Rik	2.20094351949851	0.073309086057129
A730098P11Rik	0.286237179326126	0.792442072022503
A830010M20Rik	0.588335792191669	0.57659781438345
A830018L16Rik	1.00220435287276	0.413161622197962
A830082K12Rik	1.09160302965403	0.589940624836568
A830082N09Rik	1.16847008258336	0.716110371026334
A930005H10Rik	3.73124616732909	0.0776460028381865
A930015D03Rik	0.595247625333113	0.553218404350327
AA388235	-0.945891562580367	0.54665695059797
AA792892	-0.375298600795758	0.447773164375923
AA987161	0.244624038151791	0.626492293575965
AB124611	1.30384278918104	0.284864684819578
AI314278	-1.07732939305441	0.472428455828843
AI413582	-0.877265709681918	0.524244131516984
AI597479	-0.96043239608254	0.227352274046236
AI662270	5.41112009551782	0.134129632766504
AI846148	0.532434755333098	0.663353540188868
AI848285	0.490960909147029	0.918258543355436
AU018091	0.0550701625541956	0.820896829379997
AU022252	-2.72920951784097	0.0657009615803488
AU022754	-1.08572570027538	0.297300732682245
AU023762	-0.232928668298184	0.8895782702236
AW549877	-0.0530114738859334	0.941238274176896
AY512931	-0.196323470042563	0.602977212289637
Aaas	1.12163575292698	0.0735932307175815
Aaed1	-1.96761130227535	0.0596543046802341
Aak1	0.505412122594052	0.715508403693835
Aamdc	0.876252079114833	0.271874973181651
Aamp	0.465229380822945	0.626944701837243
Aar2	-3.18542963140502	0.0581663512136019
Aasdh	0.580795569309237	0.342473935624463
Aatf	0.47929503436852	0.802083288236267
Abat	-1.13099994291783	0.252407174940221
Abca1	0.425250143446826	0.714602441568614
Abca13	1.2415217657112	0.321785815021068
Abca2	0.242156591731703	0.952196646573872
Abcb4	2.52490721400827	0.225357299288848
Abcb5	0.808210910303122	0.500154884227786
Abcb6	-0.00995020548719139	0.733082187699073
Abcb7	1.42920999135039	0.138527373173124
Abcb8	0.540580028928157	0.685329611114036
Abcb9	1.19119835347719	0.372294049640936
Abcc1	0.128663947680948	0.850698269082932
Abcc3	0.0935713081804954	0.920310935373128
Abcc4	2.24272930283607	0.0661109934151195
Abcc5	0.564093551414271	0.649794965460018
Abcc9	0.28174420507469	0.948650943878903
Abcd4	0.0114662502600449	0.952024735928413
Abcg1	0.166213937161703	1
Abhd10	1.12463257893226	0.361572365945912
Abhd12	0.394750887453416	0.73504012898395
Abhd17b	-0.386445096851191	0.606892098472964
Abhd17c	0.841616049252264	0.11679988844962
Abhd2	0.736689631611355	0.549978207138671
Abhd5	1.3237634447947	0.0585274601757566
Abi1	0.554718797336326	0.254645102182222
Abi2	-0.599079441335337	0.627729803054634
Abi3	6.10749318106689	0.26416387369809
Abi3bp	1.52330839521137	0.179227945924936
Abl1	-1.13746162868635	0.0694974770091441
Abl2	0.861744413033623	0.134930981941709
Ablim2	0.92887969106986	0.181796554165308
Abt1	0.893523160956715	0.752356601412614
Acaa1b	0.39956019939716	0.771735964064302
Acaa2	1.36148710929713	0.162676501449078
Acaca	0.897496344236667	0.34111320667839
Acacb	-0.439883582776441	0.681073519260274
Acad8	-1.10457085195934	0.413161622197962
Acadm	0.886240508184746	0.0983326635806565
Acadsb	0.934378349660776	0.200887899722469
Acat1	0.284013608935965	0.941768227828801
Acat2	-1.36072033771321	0.052255831951498
Acbd5	-0.486646903214697	0.391725813794046
Acer2	-0.676117535629388	0.288289602316021
Acer3	1.11720394763932	0.241970041497921
Acn9	-2.23907652796886	0.0766564442201824
Acnat1	1.37288211207291	0.327773515499577
Aco1	1.03728322459908	0.290866138381209
Aco2	1.63342102005687	0.0533878266216882
Acot10	1.09235873758903	0.452858677836573
Acot11	0.512589285912107	0.76517435887417
Acot13	-0.941484265508598	0.146284168847359
Acot4	7.48870890115927	0.166865780520121
Acot7	-0.790152625628571	0.253413232326701
Acot9	1.23818506810231	0.41246343042856
Acox1	-0.038064361381693	0.831105720729046
Acoxl	2.61785297946155	0.0999212894444909
Acp1	0.876353154553811	0.275328862417075
Acrbp	-1.12012211541763	0.359637431105113
Acsl1	0.70896308959184	0.383730880214385
Acsl3	0.490395717357405	0.265481860995878
Acsl5	2.89825746542117	0.120196436090496
Actb	-0.461628755177598	0.61509091697406
Actl6a	-0.321392573014688	0.44481800432322
Actn4	1.17511258435326	0.303117794612979
Actr10	0.300683703517913	0.753971445210984
Actr1b	-1.06100374073176	0.458743330004689
Actr2	-0.254196189270727	0.750101418218026
Actr3	0.944819349977164	0.059144905442226
Adal	-0.666146488129211	0.673563120736312
Adam10	-0.237474328981306	0.572291304721494
Adam12	1.63662366327277	0.306402669794814
Adam17	0.250655989531655	0.922982951523944
Adam19	-2.76954738870984	0.0928325608448154
Adam22	2.2995976645868	0.100139761515593
Adam28	1.04376187290905	0.7031179903681
Adam7	2.2502706359752	0.102875534752848
Adam8	0.920886944192567	0.362013913124983
Adam9	0.183125451150879	0.919606615554375
Adamts13	-1.05795349364905	0.146148276590155
Adamts17	1.18180837911174	0.553681241821253
Adamts2	-0.704971807041704	0.375313726278835
Adamts4	1.66925219528757	0.432671398379253
Adamtsl3	3.16367814909191	0.195791635116425
Adar	1.15570230984082	0.373949951867672
Adarb1	-0.415033168526659	0.664684598173177
Adarb2	0.983549428692963	0.0715114353013014
Adat1	-0.848220441430411	0.621653708158693
Adck1	1.23158183990977	0.25902632980404
Adck4	1.08681224225584	0.591318203425502
Adcy2	-0.648799115325207	0.673733158028196
Adcy5	1.30787815096972	0.237025690900859
Adcy9	0.834653243796507	0.474589702899066
Adcyap1r1	1.69617340348662	0.544921711554009
Add1	0.444193762642845	0.491885253321786
Add2	1.4223244987213	0.173566252376709
Add3	1.16539621196023	0.360798092935891
Adgb	2.83083764696619	0.15439471681866
Adh1	1.80920891289476	0.685609638542608
Adhfe1	-0.232371716139127	0.645364325372363
Adipor2	-0.386560356032294	0.578850345684314
Ado	-2.21233750205069	0.107817000909594
Adora2b	-1.86711155310357	0.166082325641904
Adpgk	0.219399331361356	0.689138437888171
Adprh	-0.364307418107672	0.531637731897126
Adprm	-0.0169322325988017	0.93610748075451
Adra2a	-1.54627851493752	0.378626575230963
Adrb3	-0.311498475662212	0.858947640254142
Adrbk1	-1.53852136268911	0.448621145083006
Adss	1.08605074494905	0.0801924964378918
Aebp2	0.638295979431777	0.271753522474347
Aff3	0.805171293806721	0.517804615880565
Afg3l2	1.32242387371224	0.0539607881467561
Aftph	-0.1434857307985	0.923299124029059
Aga	-1.89339807164122	0.365585227289153
Agap3	0.821891547564679	0.399166362725744
Agbl3	0.725998970207228	0.27666149201894
Agbl5	2.14594794053875	0.0963677723762969
Agfg1	-0.000844632954899303	0.911766179072257
Agfg2	-1.75252848327453	0.107052551411608
Aggf1	-1.04055814959012	0.195256793824535
Agl	0.764917995754941	0.567381708990672
Agpat1	0.914339332369387	0.269143356959834
Agpat6	0.99628988321584	0.126849742377469
Agps	-0.0209061058974447	1
Agrn	-0.398782570140526	0.723013698708001
Agtrap	-0.900678562259648	0.408728372846751
Ahctf1	-0.372003534445807	0.592842245290305
Ahcyl1	-0.921344997005462	0.161306787421405
Ahcyl2	-0.283257914863182	0.655624239285175
Ahr	0.674573029136249	0.492624012047499
Aida	-0.287855885441614	0.754378556603821
Aig1	2.81684780548832	0.187881907068625
Aimp1	-0.63735752456438	0.933709828125185
Ajap1	-0.532121901093192	0.74930979404357
Ak3	2.86616049254606	0.113739281789902
Ak5	1.20804279476198	0.169404257008065
Ak7	1.41344586967587	0.118018487486063
Ak8	0.775404692736535	0.710200222081874
Akap1	0.868991722667792	0.15163369956349
Akap10	1.28364747973552	0.0548224342571506
Akap11	-1.16974256118662	0.107049381952105
Akap12	1.15761105782244	0.216963867991914
Akap13	1.17616176268319	0.0835217658836745
Akap17b	-0.356784376473923	0.747137194590638
Akap9	1.86710271972373	0.0756304687382388
Akna	-0.528304073750143	0.762308746035611
Akt1	-0.679449507093663	0.557517661728041
Akt1s1	0.655944768488709	0.593700112633015
Akt2	-0.0200079154009715	0.98451071011306
Akt3	0.414462355496548	0.47900879891345
Aktip	1.27438036243793	0.25273011257871
Alad	-1.20606385024246	0.316921382814422
Alas1	-1.36372688831253	0.0693972269128759
Aldh1a1	7.84529945286229	0.0652142576248828
Aldh6a1	-0.0315903301103162	0.983959286068076
Aldh7a1	1.28871173125989	0.141553998030665
Aldoa	-1.21087768870856	0.153979474168787
Aldoc	-0.723422193431669	0.674895349704507
Alg12	0.884537216371322	0.526612521815204
Alg13	-0.0522571598360652	0.942106272479324
Alg14	-1.62792875936827	0.158263704536524
Alg2	0.272456341272557	0.838093593868997
Alg3	-2.69054290846308	0.117143196679475
Alg8	-2.50562699608717	0.065250194777151
Alg9	0.605555061949382	0.470121878959385
Alkbh2	-0.659597342533322	0.571993766159552
Alkbh3	0.278420799580967	0.787249486324884
Alkbh7	-1.81132567529998	0.129639864869733
Alkbh8	1.29933644440697	0.502220415607143
Alms1	-0.569271376928641	0.42075201247055
Alox15	3.53943601576665	0.295811754998792
Alox5ap	3.25295517816865	0.0800757084748142
Alox8	-0.704651460254307	0.61509091697406
Aloxe3	-0.73725278563895	0.698088238023279
Alpl	-2.32745772673633	0.148827649207012
Alyref2	-1.36341336093273	0.444623577874959
Amacr	2.08852362516679	0.293599603259458
Amer1	-0.166052404690336	0.819385217592869
Ammecr1l	-0.3973905542714	0.522742672744241
Amn1	0.513294386857383	0.729293429613581
Amotl1	-1.05106811940728	0.449363043090571
Ampd1	-0.134692247218688	0.982892823960487
Ampd3	-0.410687011454116	0.552549438751215
Amy1	1.76228453874292	0.29243898004545
Anapc13	-1.38199327084553	0.114737412117702
Anapc15	0.241765730433126	0.6428378767685
Anapc16	-0.369057552953904	0.573280697755552
Anapc2	-0.739975670864617	0.354213508896705
Anapc4	1.90006749788349	0.187833613091345
Anapc5	0.456017075955085	0.458851436790529
Angel1	1.17345009672042	0.0804409751515423
Angpt2	2.58478342532483	0.581979921790044
Angptl4	-1.02483134493912	0.529686295967483
Ank1	1.38446597270594	0.448331985273982
Ankfy1	-0.282841394154166	0.698482872553525
Ankib1	1.05271433252904	0.419890761360218
Ankle2	0.736643152426226	0.28941720619785
Ankmy2	-0.973810307338101	0.391852372673211
Ankrd12	0.280927614535683	0.741902116452507
Ankrd13a	1.03949671100989	0.0702482305112923
Ankrd16	-1.03278901470259	0.314862598493109
Ankrd17	0.317863917709283	0.520645776508235
Ankrd28	0.654280769401442	0.314271019371108
Ankrd33b	1.64827614479786	0.193011815124168
Ankrd39	-1.19180705672561	0.55952507421325
Ankrd40	0.0481922403766107	0.974121227188387
Ankrd42	-0.0425974385685268	0.979218604204519
Ankrd44	0.563877304800521	0.331072880442875
Ankrd46	0.240857476118402	0.989443539231676
Ankrd49	-0.495790945688701	0.813665633032482
Ankrd50	-0.90265191860597	0.198259340320126
Ankrd52	0.769997735362426	0.502573171362855
Ankrd6	0.472379281078219	0.342167899687535
Anks1b	2.49513456856909	0.0559624792321884
Anks3	-1.8400527632976	0.208664463921888
Anln	-0.213790456419807	0.68566258115359
Ano1	2.89580563721121	0.105159126673259
Ano10	0.849894453059918	0.339258037734308
Ano4	3.36504951598401	0.163812926475191
Ano6	0.62171731058062	0.470087577107821
Anp32b	0.926853826000416	0.173605490486203
Anp32e	-0.950193203339667	0.218719240255986
Anxa11	-0.0552268668954688	0.933175280929547
Anxa2	2.79487622949333	0.050879374479373
Aoc2	-1.97999520412279	0.138594776686793
Aox4	0.748251246241677	0.281948231525494
Ap1ar	0.192555674237147	0.708588771186804
Ap1b1	-0.0587705403848456	1
Ap1g1	-0.451848102296227	0.390255029202667
Ap1m2	-1.0155644556982	0.0881885437706693
Ap1s1	-1.58849191658598	0.164724900463054
Ap1s2	-0.893857657415972	0.23944483809927
Ap1s3	0.823218922236622	0.39401374191643
Ap3m2	1.96993114215613	0.0505260302841821
Ap3s1	0.197699781630025	0.775006901750361
Ap3s2	1.18286035614363	0.138865318537396
Ap4b1	-0.659994641931365	0.389594281246045
Ap5m1	1.21582972448291	0.0878994429442759
Apaf1	0.592668944311249	0.241053389957038
Apbb1	-0.657697862539328	0.359637431105113
Apbb1ip	5.66610844136149	0.0988611557706135
Apbb2	0.108629094600325	0.927258051962405
Apc	-0.486463170956349	0.647346026768632
Apeh	1.36574786684618	0.323276482795657
Apex2	0.279167772490946	0.822541072837657
Aph1a	1.28893022870324	0.0806705482493656
Aph1b	1.76137983256592	0.208313385324708
Aph1c	1.29806991181825	0.238886895890706
Api5	0.0187778512300583	0.872126499952304
Apitd1	-0.104517210719791	1
Aplf	0.177881834125876	0.789574167827093
Aplp2	-0.923585857985578	0.213220674524544
Apoa1bp	-1.86998641247156	0.0555376003348512
Apoe	2.01092873843689	0.198322260259509
Apol9a	3.69632922892942	0.321991685086773
Apopt1	-1.50436611328838	0.129285395817027
App	1.54963081060994	0.366779495247325
Appl1	0.274621763002518	0.668937997631697
Aptx	-0.257623067283043	0.953606572091536
Aqr	-0.466081998689846	0.57842598582609
Arap2	0.00382284509961128	0.770561238306934
Arcn1	-0.972113187362083	0.111072892158324
Arel1	0.935945138070711	0.136512039689439
Arf3	0.92483006840007	0.156850515592021
Arfgap1	-0.18068936989774	0.926196095384838
Arfgap2	-2.40977621435733	0.0777121153432584
Arfgap3	0.110126489478599	0.953092917823056
Arfgef1	0.383635108382733	0.43826544111723
Arfgef2	0.674868537324934	0.368197040837485
Arfip1	0.808811049849788	0.26243798332434
Arfip2	1.37747883517081	0.189697232286454
Arg2	0.125274753792844	0.995418200332223
Arhgap10	0.914935581570701	0.370185961949223
Arhgap15	0.801776276008109	0.222029971568836
Arhgap17	-0.446568674158995	0.360051249808726
Arhgap20	1.86225758624017	0.112922151301374
Arhgap21	0.530394122779312	0.378720286544513
Arhgap26	1.23178135111029	0.177077823482725
Arhgap29	-0.412729417489742	0.643109750694094
Arhgap32	1.65433147351669	0.407641206044706
Arhgap35	-0.962588940668352	0.100974280093796
Arhgap39	-0.746457858317654	0.529815260545961
Arhgap42	0.668909094298451	0.245155720944468
Arhgap5	-1.79397096030583	0.131705044499981
Arhgdia	-0.282359851346839	0.874498869865331
Arhgdig	-0.777198095219036	0.666413522820579
Arhgef1	-0.578879854753766	0.577687996589329
Arhgef10l	-1.75640590819158	0.42117980936153
Arhgef11	1.92880904555975	0.14422123573469
Arhgef12	-0.0228609917378549	0.885707767347691
Arhgef16	2.06212732958458	0.098749805543798
Arhgef18	0.233505953596374	0.784584899285696
Arhgef26	-1.0244975216586	0.211004121659345
Arhgef3	0.746656158255288	0.32923370793857
Arhgef33	-0.821685328393582	0.696948063093834
Arid1a	-0.557027557363597	0.353747919486541
Arid2	0.268275028397328	0.551192797183435
Arid3a	-1.89996180362177	0.0933596804789175
Arid3b	0.0304066538250264	0.961603248230603
Arid3c	0.558058289766523	0.712954358006944
Arid4a	-1.75141912642958	0.164312120891401
Arih1	0.627653027191083	0.326687746650589
Arl1	-0.920891111031083	0.26478120098893
Arl13b	0.501080804264447	0.900034369520571
Arl15	-0.0725493232125044	0.777099142742609
Arl2bp	0.920694260494506	0.193238510189371
Arl5a	-0.768381275930932	0.337291150522778
Arl5c	-0.0876390646265452	0.977152374765612
Arl6ip1	-0.0614452864911447	0.906171798956185
Armc1	0.19721187081614	0.788965568655589
Armc8	0.96681517674539	0.335539749674383
Armc9	-1.72694092745918	0.272286320960713
Armcx4	-0.42618839197401	0.842988394037981
Armcx5	-0.359935768821348	0.722501639428185
Arnt	0.863929982439149	0.193521161948773
Arntl2	0.847243892241489	0.479359514332583
Arpc1b	2.10718833493896	0.0535668244526148
Arpc2	0.237224870390031	0.723569622061827
Arpc3	2.00996969109981	0.127599048615501
Arpc5	-0.126761408851909	1
Arrb2	0.640656386544938	0.487948305540828
Arrdc1	-0.270695918103529	0.751093486662692
Arrdc2	0.45857389478646	0.531285368850566
Arrdc3	-0.977921333612762	0.280060157159489
Arsg	-1.54696142177289	0.291909058086618
Arsk	-1.69025251625105	0.102076758163103
Arvcf	-3.04360845837939	0.0578783743255155
Arx	-2.20674112004892	0.131437722995873
As3mt	2.51515630936796	0.169955163474913
Asah1	-0.526826053495973	0.869762097721616
Asap1	0.888804042927704	0.136553608276727
Asb1	-1.00148932063557	0.634831344876285
Asb12	-0.478799013182473	0.797971186954268
Asb3	-0.890639718023154	0.349153445493958
Asb8	-0.602246860895967	0.508255596380503
Ascc1	1.52224102632515	0.066313820026097
Ascc2	-1.0659344580759	0.220060015990053
Ascc3	0.311277956803566	0.531309926968947
Ascl2	-0.0188024605274965	0.947300419233904
Ash1l	-0.707068161884275	0.33097649449666
Ash2l	-0.13938488173189	0.799514816105961
Asna1	-1.83362754832452	0.0598486524126259
Asns	0.00851842236703538	0.916529461939163
Asnsd1	0.878174564377462	0.13382084381404
Aspg	0.347794966612166	0.981776538860626
Asph	-1.04291517176856	0.215293849743149
Aspm	0.985818729544505	0.0839052736975295
Aspscr1	-0.0571029254374249	0.970730013317256
Asxl1	-0.856996861200962	0.104961264760479
Asxl2	0.0368060193731405	0.915438043566985
Asxl3	0.774218731721686	0.497042602488288
Atad2b	-1.12680487457228	0.300984184527732
Atad3a	-1.23815893424052	0.0776669467621039
Ate1	-1.11663165065805	0.124046438234644
Atf1	-0.671858369391689	0.251082917001866
Atf2	0.571293077658631	0.267489693973995
Atf4	-0.719187051677984	0.176289886763036
Atf6b	-1.32058309873764	0.253254124772697
Atg101	-0.851126182140778	0.187728585727286
Atg16l1	-0.557435446600969	0.511802790319928
Atg2a	-0.22603511565091	0.770561238306934
Atg2b	-0.46599040696961	0.593468865543444
Atg4a	-0.937529372220227	0.485714913162474
Atg4b	-1.36402091547083	0.0933949223167518
Atg7	-0.0819689734671037	0.928839036632055
Atl1	2.35833934506853	0.0555376003348512
Atm	-0.472431970817168	0.318669307778869
Atmin	0.94849608902426	0.110822929024529
Atn1	-0.569319007928772	0.711110449597319
Atox1	-0.46789315104902	0.543969817866999
Atp10a	0.697155453424399	0.722435841580777
Atp11a	0.997304875164987	0.0800185600117331
Atp11b	0.106372794425507	0.757089066107968
Atp11c	0.414719747809162	0.841883369509967
Atp13a1	-1.13141241060961	0.330798722849951
Atp13a2	-1.10291138097753	0.0867051357603246
Atp13a3	-0.526461656569621	0.46146177523529
Atp13a5	Inf	0.0625865809718618
Atp1a1	-0.71243250928505	0.503367159134872
Atp1b1	-0.261186263007796	0.889461756672097
Atp1b3	-0.692743730140282	0.275505504073749
Atp2a2	0.990895717161076	0.0855255733564703
Atp2b1	1.05371479099915	0.151481040437746
Atp2b3	1.06657122081109	0.526853049972467
Atp5a1	-0.833669310878807	0.162883763260233
Atp5b	0.673410446574575	0.24194863001813
Atp5c1	0.223535974243529	0.796863369652621
Atp5d	-1.82834025006276	0.140367845726726
Atp5g2	0.0809001886907711	0.762092122205323
Atp5g3	-0.65886650453439	0.365133185032368
Atp5j2	-0.111089458256202	0.982267476225958
Atp5k	-2.53864050283833	0.0816691671720323
Atp5sl	0.482649576818511	0.705678740445482
Atp6ap1	1.05203076244428	0.166337276568684
Atp6v0a1	1.66732476781574	0.119768765623273
Atp6v0a2	0.0863883965244214	0.89815500884027
Atp6v0b	0.223558123460792	0.692227765402555
Atp6v0d1	0.445800219214516	0.409777748271439
Atp6v0d2	1.95334339305562	0.332522028707606
Atp6v1a	-0.81755288270679	0.212326421021047
Atp6v1b2	-0.197338222495411	0.891985727636757
Atp6v1c1	0.929031128190223	0.0782969544994846
Atp6v1d	-0.599170708279495	0.213765303627142
Atp6v1e1	0.344818991682598	0.500111946378047
Atp6v1g1	-0.129101479787708	0.922723625898788
Atp8b5	7.44091555740031	0.0909713141878421
Atp9a	0.534544594577363	0.584792885434262
Atp9b	0.242169248206343	0.734768490991914
Atpaf1	0.698907714061304	0.450414431131335
Atr	1.01812355762942	0.37129153772593
Atrn	0.557523594700483	0.584792885434262
Atrx	0.186155817231507	0.708588771186804
Atxn1	0.504499976921052	0.752391916362466
Atxn10	-0.559442883931348	0.404958336019547
Atxn1l	0.226732665860671	0.71659754622339
Atxn2	-0.826008194993449	0.197932842000913
Atxn2l	0.327752750825393	0.739029455476196
Atxn7	-0.563884405544068	0.399357313268876
Aurka	-0.88243760939821	0.0671721477236963
Aven	2.73690707578237	0.172417443486729
Avl9	-0.0111737891081599	0.929568311750398
Awat2	2.3545574587706	0.0593466188311531
Axin1	-0.510405118581825	0.407641206044706
Azi2	0.376450541615313	0.631204023064789
Azin1	-0.749565689154629	0.312121454916499
B020004J07Rik	-0.836864939433552	0.219219495897239
B230208H11Rik	-0.771265201876436	0.631771237160861
B230216G23Rik	-2.01731007100929	0.284189881757649
B2m	0.358215692643014	0.589960712675197
B3galnt1	1.93644221127917	0.0686094978116524
B3gat3	-2.55582430126161	0.128289513493218
B3glct	-1.12173189497026	0.436961093612942
B3gnt7	-0.296048042811371	0.766822809370443
B3gntl1	1.42179954728806	0.162324235441165
B4galt1	-2.51627101988132	0.0875701804430043
B4galt2	1.28127173010145	0.124046438234644
B4galt6	1.12197339701369	0.0702443961835402
B630005N14Rik	-1.00088018612034	0.560436602804463
B930041F14Rik	0.214429513874425	0.900972851666008
B9d2	-2.51331057363202	0.0730859642166361
BB287469	-0.999098617055441	0.157523999078902
BB557941	-0.472486449609282	0.52385382102327
BC003331	-1.01048284241168	0.318367369544989
BC004004	0.336209796156848	0.695102949826833
BC005624	1.39467334620756	0.13491811220654
BC017158	1.48257074307014	0.191924750327236
BC017643	-1.86198738992918	0.17178565718938
BC021785	-0.117315210094393	0.905392665577083
BC021891	-0.568703563465081	0.900972851666008
BC022687	0.040658117784869	0.912627814820393
BC023829	0.942483344741369	0.199460098351553
BC024978	1.13911735002241	0.510441796028247
BC025920	-2.05430487731994	0.114371163783093
BC030307	1.10518142964583	0.229847335436716
BC030336	0.214086639693868	0.685535780326057
BC031181	-1.05038088115108	0.13197249881505
BC037034	0.947253556158133	0.479152555667196
BC039771	1.15058274155559	0.504474223464206
BC048403	1.55113616145449	0.117143196679475
BC051537	1.75391778582115	0.288438447060288
BC052040	1.90487991389758	0.0518806100097127
BC055324	-1.62799787634851	0.275871681854522
BC064078	2.57725198762918	0.133838759982684
BC068157	1.21273065371332	0.514641704436536
BC080695	-0.0695735689694894	0.809259948347766
Babam1	-0.810994517104042	0.476960948537152
Bace1	-0.540952548972905	0.645811108578717
Bach2	1.49029025936302	0.232158088870114
Bag2	-2.14396834960249	0.28221553887559
Bag3	-1.52770046780487	0.064924535240994
Bahd1	0.187414972729599	0.947592840835668
Bai3	1.87043259145258	0.164074095914457
Baiap2	-2.19536593215293	0.108233132365809
Bambi-ps1	0.986023562600564	0.603998728300224
Banp	-0.336021507989199	0.619842788592343
Bap1	1.16990242002627	0.0564400585690512
Bard1	0.992325196694881	0.454817048752364
Basp1	-1.79614147984205	0.111893696968966
Bax	-0.936738582637785	0.442837811399043
Baz1b	0.281992608203792	0.78571213714807
Baz2a	0.112439819978219	0.889665617809546
Bbs1	-2.02005260103714	0.0844828229556848
Bbs5	1.05160623009892	0.205124173058732
Bbs7	2.48222011175166	0.374859265215504
Bbx	-0.685001018994513	0.804224929039834
Bcap29	1.15947111169353	0.0706211449220227
Bcas2	1.0599800031401	0.0505406768649891
Bcas3	-0.329782605899033	0.638197221197673
Bcat1	1.17595535026549	0.0504877598800815
Bcat2	1.19446905339726	0.217306297284369
Bche	0.915448292254019	0.526103081663537
Bckdk	0.838832255961158	0.597788405988348
Bcl10	-1.57931799698411	0.0696592701489265
Bcl2a1b	2.91024708469558	0.336819089317586
Bcl2a1d	0.55128419171432	0.772790619721434
Bcl2l13	-0.144041409441941	0.727560993093531
Bcl2l15	1.29463387584291	0.336807447404038
Bcl6	1.27686387720442	0.476949871285858
Bcl7a	0.325097793788457	0.778965260125766
Bcl7b	1.31933781358966	0.121311380194386
Bcl7c	0.345928252379449	0.563322969162638
Bcl9	-0.0528443237300742	0.939006131775819
Bcorl1	-1.3760109077703	0.10003848571403
Bcs1l	-1.97106935127694	0.173646565142964
Becn1	0.497170534028224	0.80350590467409
Becn2	-1.83499674890091	0.199249536981991
Bend6	1.03247835295358	0.442779929907565
Best2	-1.60367763975061	0.241314812250563
Bet1l	-2.05863883924148	0.177297718938255
Bex1	-2.76788075720089	0.107284337344559
Bex2	-3.10507990184248	0.0631230674351115
Bfar	1.0505157981102	0.18604876060504
Bfsp1	-6.1089391007909	0.274513486375064
Bhlhe40	1.41188520470615	0.0740499879465376
Bicc1	-1.59928868894844	0.171322950308191
Bicd2	0.416261090941755	0.665973933195007
Birc5	1.0701613989608	0.0591058207270516
Blm	1.22098555903011	0.065202761982325
Blmh	0.123306172672876	0.983773046135145
Blnk	0.245536080233349	0.861125041209735
Bloc1s1	0.253000738342548	0.818376192224433
Bloc1s3	-1.36675458213194	0.26521276601677
Bloc1s4	-1.66245255946669	0.0897486618657288
Bloc1s5	2.16031279614578	0.298119958453077
Bloc1s6	-0.0406923984972433	0.90557387368919
Bmi1	-1.07358160437632	0.191042746143259
Bmp6	1.68622251260295	0.0571735362344639
Bmp7	-0.0536755399834492	0.9557736234574
Bmpr1a	-0.458796960238148	0.495852951173791
Bmpr2	0.8650458362197	0.29194284538601
Bms1	1.51833291026129	0.412824573787967
Bnc1	0.415475782456227	0.670321090976472
Bnip1	1.57837524773342	0.29300959094522
Bnip2	-0.0966445707977097	0.938137439697372
Bnip3l	-0.549087326192698	0.378811582480485
Bod1l	-1.16881783067655	0.130447830980521
Bola3	2.06838527409465	0.215232155150548
Bora	-1.12826529377079	0.0635723813133506
Bpifc	-0.278588848853152	0.966919937495524
Bpnt1	0.955133333849727	0.554084556203693
Bptf	0.183639259539888	0.702904559005596
Braf	1.30668657367849	0.070215421601248
Brap	-0.331299134566312	0.549844225612873
Brca2	-0.373213968224882	0.445850415286093
Brd1	0.154033896566429	0.807763557535167
Brd3	-0.424038094982786	0.650205692702292
Brd4	0.156344230957398	0.72148620643491
Brd9	-0.231518786397441	0.689756431285075
Brdt	0.137855267351437	0.781504887281592
Bre	1.86400827598312	0.0553662171458413
Brf2	-0.556744343875496	0.621431080045474
Bri3	0.228323857967276	0.732856512114175
Brip1	0.307019066201319	0.799645429620815
Brix1	0.0618564536644388	0.901666194954501
Brms1l	0.091515286209664	0.965745328577764
Brsk2	-0.566996733505192	0.388480453311556
Brwd1	1.06667420622443	0.281526993532302
Brwd3	0.65227986277318	0.196558863806005
Bscl2	0.467131162933798	0.646181854572998
Bsdc1	0.525124436050244	0.80977698722984
Bsg	0.301595077263128	0.819094584708214
Bsn	0.266169518501366	0.862088101528951
Bspry	-1.45001214899766	0.117143196679475
Btaf1	-0.226912987380748	0.782999807485368
Btbd1	-2.23741046999791	0.23944483809927
Btbd10	0.67082472014113	0.191151455350935
Btbd16	-0.743289811900021	0.363734651244892
Btbd19	-0.816096127322615	0.282270391871331
Btbd9	0.88859671332237	0.341624444773491
Btg2	-1.45043758755415	0.204813660426989
Btk	1.54573090210715	0.163386163130467
Btn2a2	0.520049438956684	0.78275137157941
Btrc	0.975336869599774	0.117512163693555
Bub1	-0.76569480694408	0.196185114595283
Bub1b	0.264015162825488	0.80940273561336
Bub3	0.0565722331779821	0.983391593584654
Bud13	0.672815001186053	0.626362929486653
Bzw2	-1.23886619933474	0.427120227579834
C030039L03Rik	-0.489555385987499	0.590158463249076
C130046K22Rik	-0.205697780937171	0.628700774818017
C1galt1	0.143092085475406	0.854331173750642
C1galt1c1	-1.24697737241873	0.502371190845463
C1qb	3.22853961529591	0.0700449445388752
C230029M16	3.33556052580385	0.218601627704414
C230091D08Rik	0.592589048716916	0.840116162474979
C2cd2	0.434430415434089	0.731163250651932
C2cd5	0.866497575871012	0.155389568219161
C330006A16Rik	0.54060657698135	0.77967683736778
C330013E15Rik	1.94529094229858	0.279903608265597
C330027C09Rik	-1.02421886062375	0.118804410996551
C430002N11Rik	2.0515734856011	0.254645102182222
C4a	2.90560747489593	0.232932076355108
C4b	5.34824828324998	0.0789542965628432
C530044C16Rik	1.5859675315985	0.307738906571289
C77080	-2.22810222762506	0.108636210926203
C78339	-1.7250375299969	0.0574636730626782
C87198	1.0374636028007	0.368816161562204
C8g	2.92706772963061	0.0512765270918351
C920006O11Rik	-1.20430799493167	0.449490824269723
Cab39l	0.09853914462643	0.93701591306108
Cabin1	0.311537053285459	0.623438497594549
Cables2	-0.215872150355645	0.776196513368306
Cabyr	0.537473340761402	0.737039298603758
Cacfd1	-0.574580984850412	0.510960709214061
Cachd1	1.23334147554234	0.416508028452796
Cacna1d	1.57339448066556	0.420242632126487
Cacna1h	0.406379208126318	0.800247734888144
Cacna1i	0.661964214560308	0.668057027889028
Cacnb2	2.57027697250237	0.121532120765667
Cacnb3	1.57486864769896	0.0666517741618887
Cacnb4	1.86717074295273	0.151796520984956
Cacul1	0.791415841276429	0.200130899189325
Cadps	2.58262063108924	0.0952456095884047
Cadps2	-0.374819236185632	0.450613786004647
Cage1	-0.198795625733206	0.726086513736662
Calm1	1.1424323253412	0.0696211081356806
Calml4	-0.178818740826224	0.826230633259654
Calr3	0.846203769781858	0.426148102755137
Calu	0.696016700494536	0.429029732582844
Camk4	0.506983589581815	0.851920027009675
Camkk2	2.4716705737716	0.22526639735118
Camkmt	1.07114510363669	0.294964318455007
Camsap1	1.15282025471754	0.0590737715705309
Camsap3	2.30138328120352	0.132874088620668
Camta1	0.299507235840235	0.692894105648201
Cand1	-1.01068877336723	0.0562865373005829
Cant1	0.289326826509772	0.821522398179896
Canx	0.597575739367737	0.251797923085361
Cap1	-0.356967180632711	0.900034369520571
Capg	6.48800431568747	0.106736732024045
Capn1	-0.32965022399852	0.729489625089061
Capn10	-1.36963366707182	0.214664116656912
Caprin1	-0.199489915050773	0.929312345842899
Capza1	0.78833600383853	0.150427842493817
Capza2	0.0941440301581608	0.708588771186804
Car5b	1.17480605883009	0.403621329747155
Car8	2.53561399375828	0.105328578761128
Card6	-1.37936603313192	0.12951671854639
Carf	0.972211493750508	0.419461111519006
Carhsp1	0.876896104150935	0.209313242346642
Cars	-0.146570277943379	0.965469531223474
Casc1	2.8150359913258	0.0653152409472255
Casc5	-1.9916019419566	0.271442527812088
Cask	0.301402647969284	0.641762418871823
Caskin2	-0.178941775442931	0.96761232844452
Casp1	1.32517554324724	0.551192797183435
Casp2	-1.60707220943666	0.342995367574018
Casp6	-0.767383564544212	0.461749406938696
Casp8ap2	-0.801340847026993	0.285186807272558
Casp9	1.34185057434937	0.404663198859378
Casq2	2.44574686522829	0.19170404995194
Catsperd	-0.804334043680279	0.660518429138237
Cbfa2t2	-1.10478520149428	0.104114999181629
Cbfa2t3	1.74462237044537	0.249131267552621
Cbfb	-0.475220744600442	0.549844225612873
Cbl	-1.00903854527494	0.0630517128094657
Cbln3	0.454743979587393	0.763987967856278
Cbln4	1.54055580011005	0.38565009516319
Cbr1	-1.38883559085087	0.0822824556253378
Cbs	0.509625558308141	0.761106848648354
Cbx2	0.726636282164498	0.352598372866873
Cbx5	-0.481601713131794	0.327560079862734
Cbx7	-0.47298455883796	0.392728196521452
Cc2d1a	1.51395918001513	0.336610068914715
Cc2d1b	0.0737506274296522	0.872288509307957
Ccar2	1.43106646274572	0.388774368826593
Ccbl1	-1.85422079917412	0.150118197096763
Ccbl2	0.33359186673298	0.728218849374276
Ccdc101	1.50566113185479	0.0960813371028102
Ccdc107	-1.50391533630048	0.212854240446723
Ccdc108	8.4437790210686	0.149703977719387
Ccdc109b	0.792410890836221	0.256204975584277
Ccdc112	2.12932443646413	0.0596543046802341
Ccdc114	2.48545950059544	0.103849677392137
Ccdc115	0.146697935791587	0.776710037182033
Ccdc117	0.663265191975621	0.397359925371263
Ccdc12	-1.06447475664917	0.180890617202617
Ccdc120	0.832864422798467	0.266262627153743
Ccdc124	-1.99002187819467	0.0632384619407254
Ccdc127	-1.38766801062259	0.205052562868416
Ccdc130	-1.70792428775088	0.0611780781349785
Ccdc136	1.05393689053794	0.436852214886479
Ccdc138	1.4199620930743	0.219327116703629
Ccdc141	2.27866833664383	0.116066257409251
Ccdc157	-0.833586217574515	0.440235686663592
Ccdc163	-1.42410901808456	0.327759253419152
Ccdc167	1.8606549299127	0.0981772276381386
Ccdc17	3.66194577711041	0.427508399238993
Ccdc172	-0.972268621865263	0.444670409106412
Ccdc173	-0.124521817786302	0.805159861909482
Ccdc18	0.462471693834363	0.819948791490041
Ccdc186	-0.800818369514846	0.192106163661437
Ccdc24	1.91165020638025	0.12868920707796
Ccdc28a	0.228074625401349	0.941816432780316
Ccdc28b	-1.48627742890103	0.194572167118437
Ccdc36	-1.10113000118692	0.259120835920053
Ccdc38	1.64613188490303	0.375534280837906
Ccdc50	0.423118637331984	0.390227791691454
Ccdc55	0.274109470551759	0.9145858621412
Ccdc58	-1.09862200695995	0.111997031364042
Ccdc60	0.3969227070383	0.838777095551469
Ccdc61	-3.13872338942012	0.0964570380440119
Ccdc65	2.58467873295582	0.112976991662444
Ccdc66	-0.490366519654279	0.623941315419171
Ccdc71	-0.586480746871867	0.748167051158978
Ccdc71l	-1.5219241030494	0.147531716420872
Ccdc74a	1.37287898375323	0.142527544355802
Ccdc78	0.0261845259796982	0.886235821716059
Ccdc79	0.772417531116845	0.305604669608715
Ccdc85a	1.97677442927952	0.116888296473257
Ccdc85b	-2.20218906802832	0.13028613363781
Ccdc91	1.16921701392664	0.191266607428491
Ccdc92	0.691886310106115	0.323276482795657
Ccdc93	0.371165920275279	0.762030229363417
Ccdc96	-2.2479476688654	0.0758824943948245
Ccdc97	0.146943787763341	0.74625876904019
Ccl20	-5.36140848972988	0.0969970378352394
Ccl25	-1.452180991848	0.179177732213156
Ccl3	-1.66451572614585	0.183948439932642
Ccl4	4.78755490628957	0.0952343511347284
Ccl6	9.07485859584354	0.0592028271413234
Ccl7	7.77800897581681	0.187038192661188
Ccl9	5.0399854067368	0.203380670991034
Ccna2	-0.451996720951208	0.466163593320493
Ccnb1	0.670617777814077	0.264220432303663
Ccnc	-1.33287732483442	0.303722492651449
Ccnd1	-0.90744485373367	0.524281774729525
Ccng1	0.862637652997051	0.151347123749453
Ccng2	-0.378220274056987	0.796950107084274
Ccnh	-0.408634240652574	0.838270605513603
Ccni	-0.00427018218996525	0.873028777386717
Ccnj	-0.0983885780165343	0.910879040907383
Ccnk	0.4366095088746	0.487282984184777
Ccnl1	-1.06633091245097	0.204783610292212
Ccnl2	-0.407814138065492	0.513667739006854
Ccno	-0.163163070729689	0.74911612868281
Ccnt1	-0.724706188575896	0.351640245415075
Ccny	-0.764741701265113	0.274475644903906
Ccpg1	-1.13911741633602	0.132722071876339
Ccr1	2.84011354603107	0.395637783443287
Ccrn4l	0.272650386954863	0.660237514902365
Ccsap	-1.17875555157715	0.351909929237066
Ccser1	-1.0738022974436	0.0845815219365814
Ccser2	0.727416035026249	0.220421568865363
Cct2	0.117377781841668	0.890877532095362
Cct5	-0.020304561483847	0.837323076827898
Cct7	-0.952782720644629	0.271874973181651
Cct8	-0.960119526608643	0.0575784618588304
Ccz1	0.492080112030118	0.329850325104219
Cd14	9.31247293492389	0.117310650752246
Cd151	1.34897158312381	0.0725399248132752
Cd160	1.15675554695673	0.137928140361759
Cd163	-0.915849080473665	0.525083597396185
Cd177	3.18170577214101	0.0503853653152327
Cd200r1	3.02371257870978	0.205672682121196
Cd209g	0.432556956825505	0.747151943954691
Cd22	-1.85541510738751	0.0853031575066645
Cd24a	-1.48045195706849	0.0574685559250142
Cd2ap	-0.0810270047128934	0.990769245474083
Cd2bp2	-0.915883466819047	0.0905790471599263
Cd300a	-1.19137137293215	0.107891769897854
Cd38	-1.14364797239966	0.072708161920021
Cd3d	-2.45972012460846	0.0532960725612479
Cd47	-1.48058242306513	0.364827782735533
Cd52	1.26091779274313	0.665477545437745
Cd53	4.25816948304551	0.0938742198007377
Cd59b	0.246399068810614	0.967601057192483
Cd5l	10.1029157581039	0.0811099221494827
Cd69	5.1630832139406	0.174814372295742
Cd7	1.55447895221393	0.285685798991327
Cd74	2.3231410477698	0.129160224396561
Cd84	0.05007905385518	0.915219591132671
Cd9	-0.964686383020452	0.172407958118992
Cd99l2	2.42088575947687	0.0649729058410273
Cdadc1	-0.315746715605796	0.786832912140876
Cdc123	-0.464372320976934	0.35125001678015
Cdc14a	-0.931788964283653	0.342230727517992
Cdc14b	0.231587600675522	0.713526875131513
Cdc26	0.406180113201856	0.69198939594912
Cdc34	0.456187033146387	0.402566514214884
Cdc37	-1.23570076327553	0.402986301599074
Cdc37l1	0.864619162273593	0.351499253787481
Cdc40	-0.232064394211639	0.864900052338908
Cdc42	-0.226669069487142	0.819745983734243
Cdc42bpb	0.802670894396417	0.321354986976416
Cdc42bpg	-1.85859469933668	0.0657009615803488
Cdc42ep2	-1.15194427704638	0.113037505669084
Cdc42ep3	-0.617914401960597	0.695327552075595
Cdc42se1	1.13010371672944	0.0700171592017929
Cdc42se2	0.770331400089829	0.16153940774221
Cdc45	-0.946490987586546	0.0699411880472224
Cdc6	-1.05268002236485	0.124271938661935
Cdc7	-0.345628884228422	0.839957659929578
Cdc73	-0.982325598402447	0.26478120098893
Cdca3	0.898798285443091	0.153005926048317
Cdca4	-0.945888350054869	0.0816262160678864
Cdca5	0.0168518838340203	0.892814784154947
Cdca7	0.0153815029566645	0.864371640212301
Cdca7l	0.367777549652067	0.773537939537163
Cdca8	0.19844626597015	0.587480540499513
Cdcp1	3.00280565909866	0.109568247551127
Cdh16	-0.535678450094948	0.65713788531801
Cdh2	-1.06026765988353	0.240723142792083
Cdh4	-0.233532267611243	0.997504234314676
Cdh9	1.31792754900238	0.414440715162842
Cdip1	-0.767707083926081	0.184592276459817
Cdk10	0.0769926562535199	0.919730763033593
Cdk11b	-0.982355386023288	0.276435287972
Cdk12	-1.0329359995535	0.125923696309606
Cdk13	-1.31887451123852	0.144734318673187
Cdk16	1.19384698072637	0.0741197176711757
Cdk17	-0.13305335117599	0.97640784022336
Cdk2	0.168739659750047	0.858735410313814
Cdk4	-1.33167151038723	0.3302126090795
Cdk5rap1	0.119357615804721	0.950165430459123
Cdk7	0.58031209365418	0.347913721471084
Cdk8	0.787359539539394	0.113493683224173
Cdkl2	0.581678538549595	0.273857549762107
Cdkl5	-1.61915559223868	0.360798092935891
Cdkn1a	-1.07314106366035	0.144868664187132
Cdkn1b	2.54829718845752	0.0655093546956337
Cdkn2c	-2.04679657314175	0.0813796125560151
Cdnf	-1.74663707545296	0.172327438045573
Cdon	-0.572545670054607	0.525471229294939
Cdpf1	1.18437970099705	0.241435103659699
Cdr2	0.427791637589926	0.468663855579016
Cdr2l	-2.11984291393479	0.136663334056333
Cds2	-0.512278549824831	0.420758742595716
Cdt1	0.409653424464887	0.738624121134567
Cdv3	0.829391419660534	0.142594268684464
Cdyl2	1.72204152755351	0.207164857340693
Ceacam1	-0.426380447146484	0.447291881678085
Ceacam19	-2.599737418366	0.0961271036084944
Ceacam2	0.760403938252958	0.375020596266772
Ceacam5	2.87075532371001	0.093905491291138
Cebpa	-2.63512156576214	0.0795728753815001
Cebpd	-0.945015653377564	0.579699285109083
Cebpg	-0.35001003684616	0.620353327195817
Cecr2	-0.256987412331796	0.69808793622283
Cela1	0.920609392436396	0.386680460471892
Celf1	-0.566338025611643	0.415368128236842
Celf2	-0.324898542517225	0.584444295311534
Celsr1	2.01263666640856	0.114528570013535
Cenpa	-0.503604465607993	0.394559438321238
Cenpc1	-1.74679611777644	0.17628871412844
Cenpe	0.703316361173494	0.234768894984867
Cenpf	-0.672080886147491	0.174814372295742
Cenpk	-0.397728178349177	0.615725923195953
Cenpp	-0.64491811892595	0.485990817846858
Cenpq	-0.814204090257308	0.54126089143504
Cenpw	0.203477030859695	0.490451027781526
Cep104	1.26868603609241	0.196656123891835
Cep152	0.152036744035864	0.754917395479122
Cep162	0.160750342757092	0.935829664509877
Cep170b	-0.429274261819684	0.469359801140946
Cep192	0.119389355289812	0.848450816164965
Cep350	-0.171957212714529	0.748865301277344
Cep44	-0.0200476727477807	0.912503577199803
Cep57l1	1.8444834223966	0.06353137056947
Cep63	-0.626814273231869	0.591318203425502
Cep68	1.42055895074428	0.0693354925573231
Cep72	-2.44010457149598	0.212597826337146
Cep76	0.780736243315024	0.247791771222739
Cep78	0.254919698642029	0.99617549002239
Cep83	1.28300581120733	0.0723928761366727
Cep83os	-0.648509211792748	0.71659754622339
Cep85l	1.97350679074013	0.0832062863455767
Cep95	1.83907352355878	0.0582328187749659
Cept1	0.878421817057927	0.158394540282318
Cers2	-1.08399280161117	0.220954045912913
Cers5	-0.0296118603995893	0.975427132870072
Cetn2	1.00346194541447	0.134873804041204
Cfap43	1.86859638524198	0.26590956317799
Cfb	1.55474890162613	0.203380670991034
Cfdp1	-0.421735513192015	0.443182986537156
Cfh	2.8817312210072	0.163746771080803
Cfl1	-0.228394787338546	0.697130394774175
Cfl2	-0.734219887887355	0.506099852574108
Cflar	0.556231738880953	0.440890668413922
Cfp	1.65267368261045	0.531757976981948
Cftr	1.54005448781785	0.590067162945725
Cgn	0.935460973923078	0.174526800130377
Cgnl1	1.97450572084776	0.077034762398527
Chac1	-0.794579295507593	0.382529602017453
Chaf1a	0.948293329453095	0.155560792421888
Chaf1b	-1.56639292071988	0.0648046147785243
Champ1	-0.229664673146817	0.791367697485901
Chchd1	-0.765977639305154	0.273215399963312
Chchd3	1.21477109336285	0.0766594833750309
Chchd5	-1.67961873922574	0.15301437838997
Chchd7	0.284679154353839	0.957112199947897
Chd3	-0.572523557405285	0.728397605518398
Chd3os	2.22080344447263	0.133987272179138
Chd4	2.16807093949174	0.115224151719248
Chd7	-0.754470352285573	0.37030199209066
Chd8	-0.181263463659664	0.568167688027953
Chd9	1.03732931959205	0.0903448050592023
Cherp	-0.356568676037333	0.571477701392817
Chga	-0.48060032487402	0.797509402637584
Chic1	-0.799869978474241	0.402953855097854
Chic2	-0.314376557032609	0.941443935426354
Chid1	-0.14128638298152	0.951266214046347
Chm	0.536608785499767	0.7054675171772
Chmp1a	-0.25351380271154	0.485304202323074
Chmp5	1.24976015039127	0.209273230946396
Chmp7	0.894788854647086	0.286604352330393
Chn2	1.53980860025702	0.14649203110388
Chordc1	1.38812777463928	0.130233277448712
Chp1	-0.0942189186007976	0.835497957979564
Chpt1	-0.35742143050282	0.80940273561336
Chrdl2	0.34769157056081	0.906171798956185
Chrna1	-0.921117400172817	0.212892669556172
Chrna5	0.551108751232901	0.897872805755093
Chrna9	-0.606750616862273	0.687538292533216
Chrnd	2.3981854947824	0.0789036330597657
Chst10	4.23977842240691	0.225815597957947
Chst11	1.38706021877183	0.173646565142964
Chst7	0.125410617530787	0.906549549400248
Churc1	-1.14133492467761	0.118556205514278
Ciao1	1.04232657790069	0.1931457483584
Ciapin1	0.523946646735238	0.4946399845336
Cib1	0.939308174923514	0.523287592865839
Cic	-0.813721401181946	0.212892669556172
Cipc	0.71656941699726	0.236425005324144
Cir1	0.773142724139765	0.321920066676975
Cirbp	0.388729773332933	0.684895265208065
Cisd1	-1.06324764822964	0.100086090357192
Cited1	-3.76444732427757	0.0604974092723062
Cited2	0.49512612965836	0.564118863444839
Ckap2	0.271422171092359	0.896579580805805
Ckap5	-0.347944225406852	0.601540505123635
Cklf	1.2051616826241	0.578981454270779
Clasp2	2.04999189188712	0.0594292875151573
Clasrp	-2.41480585555592	0.107279734787713
Clcn2	-2.15173453735063	0.201771728730024
Clcn3	-1.03834781566523	0.189184961013915
Clcn4-2	1.29880757657735	0.371130924852479
Clcn5	0.852737240011723	0.175060500467724
Cldn12	0.0736890653632433	0.845046788611198
Cldn7	1.46750650934874	0.165474368960469
Cldn9	0.101487271026253	0.947592840835668
Clec10a	-0.659694379778699	0.378515249178823
Clec12a	1.2244396077385	0.37419538498541
Clec16a	0.678446229238402	0.421933334704506
Clec2g	-1.36631143772388	0.220698324217697
Clec2h	1.58380478264202	0.238106978176543
Clhc1	-1.07331362865292	0.156945804184419
Clic1	1.8605980683744	0.16879243194393
Clic4	-0.865547798131949	0.134887098879463
Clint1	-0.410433931880006	0.715320364357392
Clip3	-2.50049205734176	0.0703548006942222
Clip4	0.886774829314715	0.273510687631781
Clk1	-1.22684958212889	0.0607340365576109
Clk3	-0.424439534415598	0.660554612230235
Clmn	-0.721654166481262	0.576122142091658
Clmp	-1.63854950826794	0.0909713141878421
Cln3	1.50026855213387	0.0749376838651374
Cln6	0.987943427681961	0.415841612335431
Cln8	-0.0423153682098336	0.90685059932322
Clock	0.267736559086133	0.614996954186346
Clptm1	0.0210170127267041	0.973798039190697
Clptm1l	-0.226139946204132	0.90155096961197
Clspn	0.939932196424391	0.15883306539725
Clstn1	-0.350937385219715	0.667611924279336
Clu	2.78199389700009	0.111997031364042
Cluap1	1.87157379006613	0.0963835549176748
Cluh	-1.15718331787581	0.117427027511352
Clvs2	0.678061900873046	0.230757238393864
Clybl	-0.410543242027892	0.612708961725117
Cmah	-0.593394784429929	0.301567795660583
Cmc1	1.22540224641327	0.101968040638889
Cmklr1	-0.27380327018155	0.886759160428321
Cml2	0.69776104006004	0.388543683557487
Cmpk1	0.728753048863689	0.168706268854563
Cmtm2a	2.03318937364358	0.148166127613705
Cmtm6	-0.879352492024936	0.145272840744864
Cmtr2	-0.335928145427038	0.775223776468495
Cnbd2	-1.14049301906176	0.344484905369873
Cndp2	-0.776925307937105	0.758385998654533
Cnep1r1	-0.276952901627973	0.592114558138584
Cnga1	0.0356908589480834	0.979788680761121
Cnga2	0.769914960377929	0.69808793622283
Cnga4	1.51084850715827	0.109761145689249
Cngb1	-1.50963309188237	0.354252229156603
Cnih1	-0.0310069921174817	0.859649659781915
Cnksr3	-1.39144557830008	0.052573601873401
Cnn1	0.583631771382581	0.538168363671298
Cnn3	-0.557458333662417	0.336549213365284
Cnot6	-0.588771732766155	0.493147512416507
Cnot8	0.0376661459862143	0.99561052463247
Cnp	1.05530519445389	0.526158517828344
Cnppd1	0.0820134258012949	0.999184988050822
Cnpy2	1.46924622172578	0.300356572635965
Cnpy3	-1.82766957212538	0.15013217574301
Cnst	1.20762822216101	0.0544894074375074
Cntln	0.660612824271688	0.234439634318306
Cntn2	1.90835350621041	0.334388090533176
Cntn3	-2.90430136754472	0.478151691809272
Cntnap1	0.966884116018659	0.164665089321113
Cntrob	0.26855489539055	0.826051804944183
Coa3	1.43953693750477	0.232158088870114
Coa5	0.662277223408919	0.456836150574972
Cog3	0.145424968403861	0.884728833672145
Cog4	-0.51674830944342	0.428077663649583
Cog5	-0.469581991936376	0.70653784284236
Col13a1	-0.0704228814275788	0.933609852858771
Col14a1	2.80755805910889	0.102033296356563
Col19a1	0.897255016680794	0.273700699227393
Col25a1	-0.123144706764849	0.883024951822678
Col2a1	0.307777282899907	0.871747318606453
Col4a1	1.79237920757416	0.333774825207018
Col4a3bp	0.469804124797971	0.422370495918586
Col6a5	1.1485668077823	0.651125827866137
Col9a3	1.20049491031432	0.453961931619311
Colec12	0.811741689151397	0.178735702915728
Colq	-1.23893939453738	0.332965854362056
Commd6	0.729224624456069	0.225104133993525
Commd8	-0.88268425237112	0.458851436790529
Comt	-0.985557895407552	0.140732106619511
Comtd1	0.712908173790031	0.642945128454362
Copb1	1.08081719486733	0.342332052443175
Copb2	-0.567445262671305	0.619249692307264
Cope	-1.42006055937893	0.12153058669306
Cops3	-1.65738427325827	0.106046127383069
Cops4	0.882985602849305	0.171679302090356
Cops5	0.482972029876465	0.364669068845532
Cops7b	2.18739723254182	0.526612521815204
Coq10b	-0.518642838418711	0.623727819262252
Coq2	0.419030999381306	0.815284815705027
Coq5	0.529114788842192	0.675851529563261
Coq6	-1.27015363345653	0.192843724582044
Coq7	1.39130374323913	0.277383945109139
Coq9	-0.85858374495547	0.356416560246412
Corin	1.38928783571302	0.412986374185007
Coro1b	-0.213168010538068	0.811187002686105
Coro1c	-0.830463647682444	0.32578502922833
Coro7	-2.67146912966732	0.362948446229726
Cox14	-0.35661449990138	0.865433216704535
Cox16	-1.09937335007439	0.319878226371571
Cox18	0.0373944250907799	0.941068120919312
Cox20	-1.89997012865939	0.272286320960713
Cox4i2	0.0248319811447232	0.955610767959239
Cox5a	-0.340776742912742	0.70666224399486
Cox5b	0.520655642327392	0.579018002984305
Cox6b1	1.11077549728961	0.0617519498178325
Cox7a2	0.434934933484401	0.42985962965816
Cox7b	-0.597185936566952	0.449579045459704
Cox7c	-2.29559992348798	0.160896366836876
Cox8a	0.460459128377476	0.542536998079219
Cpa1	0.17804517097713	0.813343051295058
Cpb1	-0.874670269479334	0.419152841682411
Cpeb1	0.818274953524877	0.260788461794996
Cpeb3	0.902187788706694	0.132100829023497
Cpeb4	-0.663314711460287	0.314248311337226
Cplx1	1.38264634495793	0.0984173387409794
Cpm	0.569714114964771	0.488680350900749
Cpn1	-0.516815685972981	0.778598278676301
Cpne7	-1.17183560229652	0.362915584270545
Cpne8	-1.11648835166426	0.247303941381961
Cpped1	0.670322148342363	0.543556427267638
Cpsf1	-1.49282167800899	0.174326204540385
Cpsf3	-0.813949759542251	0.207164857340693
Cpsf4	-1.55908680857802	0.295811754998792
Cpsf7	-1.526957170385	0.141012594368846
Cpt1a	-1.3798420928502	0.0620741045632826
Cpt1c	-2.10612225730907	0.153298716270438
Cptp	-0.821177339605417	0.180116695909175
Crabp2	2.35621236471933	0.16530068810478
Crat	0.296574092491198	0.726777525439967
Crb3	0.321102502732118	0.6628292255696
Creb3	-0.409847454175216	0.939006131775819
Creb3l2	-0.620222091186995	0.786330388366759
Creg1	-0.224114736514471	0.820896829379997
Creld1	-2.07796391754482	0.189917829069733
Creld2	0.025575984229959	0.960140427593469
Crip1	2.66726292495381	0.122997364349233
Crip2	0.0183655534201425	0.93701591306108
Cript	-0.67453559759888	0.289937648779796
Crk	-0.342848423401617	0.734085680869011
Crls1	0.830774736685364	0.33010552483497
Crnkl1	-0.00724891397535879	0.848473128049506
Crot	0.470342954811528	0.932250686937763
Crtc1	2.3665910194253	0.181097351295857
Crtc2	1.07908116501226	0.622909999969829
Crtc3	0.131419337875815	0.926126169304597
Crx	0.675873535373439	0.297564307255413
Cry1	-0.0381783774793378	0.992365782159449
Crybg3	0.813108255732726	0.294138984502072
Cryl1	1.38881608244184	0.103903279147104
Csad	1.87076318940047	0.0566689101882211
Csde1	0.292139819056502	0.68039641849533
Csf2ra	0.518096444852911	0.513201941459473
Csf2rb	4.40819474923049	0.0703977240247653
Csf3r	0.230022549466887	0.94030115406777
Csk	-0.329211233330893	0.73504012898395
Csnk1a1	-0.405316726979714	0.614813805655473
Csnk1d	-0.0824716805459839	0.859950084501944
Csnk1e	0.968335318305667	0.144276464095028
Csnk1g1	-0.403209715329873	0.609679089103771
Csnk1g2	-1.59943986777234	0.307094072016402
Csnk1g3	-0.902360557154582	0.205052562868416
Csnk2a1	-0.977929578393701	0.104627149799613
Csnk2a2	0.264373789774443	0.690932018599732
Csprs	-0.711144474924441	0.219777924759413
Csrnp2	0.749857519596377	0.242043959946191
Csrnp3	1.24195091326065	0.716834065078997
Cst3	2.37802037826853	0.088702909599997
Cst9	-0.601041424098589	0.673117491025828
Cstb	0.499399169840402	0.727623190825152
Cstf2	0.069360304359061	0.995895984274778
Ctage5	1.06796298041995	0.0614239242013935
Ctcf	-0.429570187210608	0.599411450146528
Ctdp1	-1.7323328186814	0.141240793061445
Ctdsp1	-0.715570436308737	0.301567795660583
Ctdspl	-1.19156984214899	0.345030447483719
Ctdspl2	-0.635785578404461	0.447859603360713
Ctif	2.34945742467638	0.0789349644149072
Ctla2a	3.56145076246316	0.154483796944669
Ctnna1	0.613096988398205	0.368912521399038
Ctnnb1	-0.588228166363982	0.450527283302576
Ctnnbip1	0.481097439912722	0.517137359344003
Ctnnd1	0.761625235861841	0.188705144561897
Ctnnd2	1.83789374976732	0.260346293268556
Ctps2	-1.26265226071545	0.0711286126197347
Ctr9	-0.296356594975801	0.447291881678085
Cts3	1.67164441002738	0.211410900004895
Ctsd	0.900004928346462	0.260037054048413
Ctsh	-0.234459451163092	0.781504887281592
Ctsz	-0.666900957065224	0.705667414713977
Cttn	-0.977487962183961	0.173258396416262
Cttnbp2nl	0.384314942626385	0.574884328188697
Ctxn1	0.0742890337993947	0.967601057192483
Cul2	0.3251920266414	0.633545056512996
Cul4a	-0.0610885577404933	0.919732414451033
Cul4b	-0.379392859615677	0.672178815014594
Cul5	-0.173667509897448	0.983127876467618
Cuta	1.33564347791534	0.0715114353013014
Cutc	-0.717912899198395	0.801278445327029
Cux2	-0.822633650579027	0.523013772950619
Cwc15	-0.294499965829995	0.814622599893535
Cwc22	-0.254775249361317	0.641835132997558
Cwc27	1.71424180701147	0.0869189980687519
Cwf19l1	1.33247125020478	0.479640239013849
Cwf19l2	2.43308284858615	0.0614843090185891
Cxcr2	-0.943245909650509	0.177076197681458
Cxcr3	-2.0168262750372	0.300735761056425
Cxx1c	2.19704109240143	0.0719878824149192
Cxxc1	0.910051095178347	0.225016879710517
Cxxc5	-1.55134345769363	0.271364504050953
Cyb561a3	0.709941573118299	0.285125250555814
Cyb561d2	1.91640886166793	0.39196490627592
Cyb5a	1.83749650089505	0.0509509888059091
Cyb5b	0.844167731218565	0.222095491581489
Cyb5d2	1.24921420513503	0.59881327498868
Cyb5r1	2.63205001053514	0.104568133459346
Cyb5r2	1.70300524660782	0.092080741554951
Cyb5r3	-0.402354473584208	0.687697940738913
Cybb	6.72443592542071	0.0600229502653248
Cycs	-0.932510793393594	0.129606400224461
Cyct	1.01948859278342	0.394138907487113
Cyfip1	0.780966250700076	0.321955196949118
Cyhr1	-0.211551138106071	0.835518246349051
Cyld	-0.748990521389341	0.414667323421964
Cyp2b19	-2.810912260319	0.155445812294242
Cyp2c29	2.50298817992717	0.0975719496811407
Cyp2c40	-0.558808346423875	0.796218369937721
Cyp2c44	-1.70145858841647	0.132254620856622
Cyp2c53-ps	2.57199923345918	0.0836304443619287
Cyp2c55	-1.1281406817269	0.476376735214485
Cyp2c67	-1.52588047238163	0.339973171366475
Cyp2c69	2.66482529413038	0.0750081288660701
Cyp2e1	-0.759474821492606	0.361321246523355
Cyp39a1	0.779712408596567	0.267462606203259
Cyp46a1	-0.904011149397636	0.450578078125461
Cyp4f39	-0.883978559320864	0.556013990937253
D030028A08Rik	1.29781635515879	0.410224832081855
D10Bwg1379e	-1.36413958673247	0.0533615052012421
D10Jhu81e	0.800480627892209	0.512392769194054
D15Ertd621e	-1.14071597096458	0.140732106619511
D17Ertd648e	-0.717262258874256	0.306929376531675
D17H6S53E	0.520238067424402	0.776091167817031
D17Wsu92e	0.390965809188291	0.488407795691517
D1Ertd622e	-0.517722402348305	0.421933334704506
D3Ertd254e	-0.831120939185662	0.363734651244892
D3Ertd751e	0.621852978840466	0.699010006463526
D430020J02Rik	-0.280204064897114	0.689138437888171
D430042O09Rik	0.754384269330831	0.39196490627592
D5Ertd579e	0.831832829200936	0.772214149201396
D630023F18Rik	-0.258346575087482	0.927258051962405
D6Wsu163e	-0.532474696738553	0.519610830790977
D7Ertd715e	-4.41049172299508	0.0833087143604422
D930015E06Rik	-0.337856941760176	0.719683564681131
Daam1	1.15062733618079	0.0844828229556848
Dab1	1.77501028949191	0.192612102141502
Dact3	0.221302997600776	0.869762097721616
Dand5	-0.0978847971893575	0.959740659819935
Dap3	1.70689882384689	0.0637115103561436
Dapk1	1.80641015209868	0.214476613097786
Dars	-0.970479807297488	0.14967426841105
Daxx	0.245499017922464	0.95548915407443
Dazap1	-2.15659713925268	0.112290160208485
Dazap2	1.00748249536135	0.0518821497232623
Dazl	-0.114400828957142	0.979080095769787
Dbf4	-0.166665494290686	0.942433855378573
Dbndd2	-0.955693061144497	0.349726843585351
Dbx1	-2.01005495596626	0.198899701771629
Dcaf11	0.156403260614372	0.818376192224433
Dcaf12	0.506516182745394	0.437655325121454
Dcaf17	-0.33914131097699	0.638204907381004
Dcaf4	-0.193192272549298	0.85273823662953
Dcaf6	2.21705429962284	0.0549253291071199
Dcakd	-0.183634803214264	0.851050428451316
Dcbld2	1.1255299829184	0.0657616586229857
Dcc	-1.31860405813055	0.088483743844978
Dcdc2c	-0.444233542107742	0.606347428122764
Dclk3	1.27201184470598	0.160537396276634
Dclre1c	-0.695853828445988	0.262504105036988
Dctd	-0.719242110885885	0.26478120098893
Dctn2	1.13939855629323	0.264381691129256
Dctn3	0.326626295855736	0.665973933195007
Dctn4	0.495577773044814	0.394198635469094
Dctpp1	-1.12257193968712	0.150809782402972
Dcun1d2	-0.179407335326196	0.696509122937926
Dcun1d4	1.13274979001205	0.134092621475107
Dcun1d5	0.092043619210708	0.793072308442859
Dcxr	0.0528116246234447	0.938851864074776
Dda1	-0.162237434082014	0.729489625089061
Ddb1	1.06506741997255	0.0689791755897291
Ddias	-1.18972947506764	0.108905499719795
Ddit3	0.255739718499631	0.898212437993656
Ddit4	0.510256746269319	0.72864771803367
Ddost	0.549441072159507	0.505333665936749
Ddx1	-0.719489168114644	0.415147042988111
Ddx11	0.0991838119359282	0.9519029719072
Ddx17	-0.724767712131361	0.221745176339848
Ddx18	-0.530166989837734	0.435483831283834
Ddx19b	-0.60960974036418	0.35270180747444
Ddx28	-1.49138536580328	0.140671687241741
Ddx3x	0.44459447200668	0.404508415633637
Ddx4	-1.50872069604251	0.165431793661215
Ddx41	-1.22583627353588	0.185421124641136
Ddx46	0.113376186086396	0.837323076827898
Ddx6	-1.40309572683716	0.207111308917876
Ddx60	-1.32859477451173	0.229914314176968
Deaf1	-1.47177708499618	0.0684595646674558
Dedd	0.850787872711576	0.258023576924316
Defb20	2.42080516145703	0.307972289876556
Degs1	0.691304546170074	0.177763389097827
Dek	0.553926436634239	0.466896444748948
Dennd1a	1.06891122180871	0.15294886569362
Dennd1c	2.09055197381823	0.285105980688969
Dennd2a	-0.190788148222873	0.890571265291506
Dennd3	-0.84112061268419	0.338812937548777
Dennd4a	0.886134225212228	0.221553659287242
Dennd4b	0.0857544442473317	1
Dennd4c	-0.0617828534698554	0.942252906229128
Dennd5a	-0.874567461187537	0.206213888808467
Dennd5b	-0.36773902278858	0.61462248430526
Depdc1b	-2.29081629366301	0.160232633380328
Depdc5	0.394979582694456	0.563840842326144
Depdc7	-1.01131675396921	0.0684074403107084
Dera	0.750770474526544	0.495924325820029
Derl1	-1.20345390681317	0.196634812419227
Derl2	-0.20468719004677	0.833469686123182
Derl3	0.133045501137199	0.864039463193845
Desi1	0.930765785036741	0.340940073502545
Desi2	0.667885577014846	0.232932076355108
Det1	0.750721818681771	0.431993688843892
Dgat2	-0.738281915559163	0.64099207922644
Dgcr14	-1.24150899123551	0.0591848102949909
Dgcr8	-0.845025436805982	0.214983465372885
Dhcr24	0.872298730738109	0.61359886952771
Dhcr7	-1.53836282822982	0.0835193480787669
Dhdh	-1.80641293925392	0.275871681854522
Dhodh	0.67498415620703	0.293697055928931
Dhrs11	0.52822681810107	0.645863638017232
Dhrs13	-2.45115686852958	0.184924992985565
Dhrs2	2.03402351275162	0.0984173387409794
Dhrs3	1.03284539473448	0.515966773160196
Dhtkd1	-1.29342827005414	0.134129484529384
Dhx15	-1.48911337558221	0.220832495574395
Dhx16	-0.965559501229733	0.242807068459501
Dhx29	-0.194722176014976	0.820504986219284
Dhx30	0.122165663413956	0.78873982161481
Dhx32	0.97320951806053	0.182311407047147
Dhx35	1.34247844724865	0.35125001678015
Dhx36	-1.01034602760548	0.133002346019479
Dhx37	-0.803375351756227	0.593948095334582
Dhx38	-0.528647997867211	0.665635178736656
Dhx40	-0.834403442978724	0.232856058459759
Dhx57	0.350919015170867	0.819745983734243
Diablo	-1.31163823305341	0.0797585771424661
Diap1	2.32733062733538	0.118456712371631
Diexf	-0.0653179064928124	0.874929499851817
Dip2a	0.147314672662864	0.969770334332657
Dip2b	-0.175874265876746	0.712190739814507
Dip2c	-0.228649767915581	0.807419157644952
Diras2	0.900391235968369	0.408728372846751
Dirc2	-0.906875632277	0.314174957979914
Dis3l	0.366152884507071	0.713730662847453
Disp1	1.19278200633513	0.186184428607766
Dkc1	0.415735509352177	0.471280827291573
Dlc1	1.34525698607831	0.21368470292137
Dld	2.24140714774336	0.0514713939938793
Dleu2	-2.05003073858282	0.0536454767425028
Dlg1	0.331507036754409	0.581187832711106
Dlg3	-1.2201928741579	0.530393583134461
Dlg5	-0.993603847126589	0.149760943573468
Dlgap1	-0.543658575027791	0.695755353187411
Dlgap2	-1.58023534605853	0.434422588849061
Dlgap5	-0.163696720882459	0.754053795464816
Dll3	-1.27639244909009	0.255950337736398
Dlx2	-1.61352181210118	0.200781034139469
Dmbx1	-2.90648556195862	0.0519591303244442
Dmc1	-1.28459575222269	0.319076202106781
Dmd	0.201208542381409	0.858476204178177
Dmrtb1	-1.39818893138879	0.0546114984156951
Dmtf1	-0.910866798375493	0.183478461728751
Dmtn	0.563924696500073	0.472428455828843
Dmwd	0.105496238529466	0.9920808982446
Dmxl1	-1.17611952172131	0.136254300605644
Dmxl2	0.888724026399988	0.171679302090356
Dna2	0.0886814644531057	0.807686785173621
Dnah2	-1.74686140156586	0.103073680482409
Dnah6	7.37975259974509	0.0627728711345812
Dnaja1	0.225052871257212	0.736504916403702
Dnaja2	0.24710090995906	0.524244131516984
Dnaja3	-0.254983830741831	0.753362274470048
Dnaja4	0.350886055601177	0.74154474540212
Dnajb1	0.105522643414845	0.846539419486298
Dnajb2	0.927376806883665	0.301272987180938
Dnajb6	-0.895833654918213	0.155389568219161
Dnajc1	-0.405402621513681	0.736504916403702
Dnajc10	-1.02244763453953	0.311466775114247
Dnajc13	0.438277958586717	0.458540185536096
Dnajc18	1.65524455908866	0.122380316816964
Dnajc2	-0.15409987793218	0.844084553261029
Dnajc21	-1.14893666133519	0.059345459741229
Dnajc24	-0.838767436816691	0.668288380311187
Dnajc27	-0.853632672043875	0.502371190845463
Dnajc28	-1.35513022074335	0.391668794538173
Dnajc3	-0.958300857627192	0.217269880637712
Dnajc5	-0.174530866088467	0.686892743369939
Dnajc6	5.68306207407224	0.119366703275471
Dnajc7	0.674755056530573	0.399570581676996
Dnal4	0.579184755560183	0.27536154885636
Dnase1l1	-2.47255182024397	0.0581738276561336
Dnd1	-1.73244065529325	0.355780555823999
Dnlz	-0.735631567330413	0.76276281110718
Dnm2	-0.161953369305301	0.96761232844452
Dnm3	2.20572218455049	0.157996562028424
Dnmbp	-0.646035626812584	0.583493971030983
Dnmt1	0.0699731397201387	0.976983628595001
Dnmt3a	0.714054189233345	0.225087020653386
Dnmt3b	-0.0909827495889482	1
Dnmt3l	0.83656016759466	0.25273011257871
Dnpep	-2.32843203879153	0.0565862886165822
Dnph1	-2.22110163598752	0.0772399079036729
Dnttip1	-1.38195213658555	0.486159728236818
Doc2a	-0.374870030610584	0.838895480079704
Dock1	1.54347456017168	0.207164857340693
Dock11	-1.64083150524791	0.163870294192961
Dock5	0.956544854124005	0.157866175017609
Dock6	1.31789734907177	0.194213600280956
Dock9	0.542398887769446	0.285598865101102
Donson	0.77853099999614	0.167854297001228
Dopey2	0.542963462525788	0.649188977927582
Dot1l	-0.0343620194117937	0.980809863760092
Dpep1	-1.01320394972878	0.409188488537404
Dpep2	-0.547707841694992	0.592955923325007
Dpep3	-0.97157979131439	0.552713125656511
Dpf3	-0.538754178134645	0.562348355057431
Dph3	-0.397303691693121	0.650436578401992
Dph5	-1.16635518822845	0.359766279420391
Dph7	-0.369073529622782	0.82206070037627
Dpm2	-0.828782651086569	0.396758731971921
Dpp10	0.867502144856904	0.154232863629835
Dpp3	1.75124893887752	0.311472102363667
Dpp8	0.668077393657946	0.468651287474219
Dppa5a	-0.649820774014596	0.660872418903465
Dpy19l4	0.844245000763552	0.332842514979261
Dpys	-1.21548268456046	0.528517641455935
Dpysl5	2.25920198134853	0.0854025486268878
Draxin	2.03104848137341	0.328836697784956
Drg2	-0.350834313299753	0.832771974924107
Drosha	0.839109619801195	0.174326204540385
Dsc2	2.37142746388131	0.0637162342080967
Dscc1	-0.505937606223442	0.631979407251183
Dse	-0.400111340730944	0.811187002686105
Dsel	-0.167090435414338	0.959433822214985
Dsg1a	0.608218445447032	0.617459445906877
Dsn1	1.30394511973023	0.107857767656173
Dsp	0.597807518545857	0.904176810333264
Dstn	0.993778476295097	0.102201845852686
Dstyk	1.23344774597802	0.0803609232511218
Dtd1	0.0633877816137305	0.882917474187368
Dtl	-0.420546557036671	0.394554684373507
Dtnb	0.508215330667182	0.582615338634744
Dtnbp1	1.54547367088701	0.0941755296105061
Dtwd2	-0.251712002345314	0.749559638520312
Dtx2	-0.356091962182705	0.748680169000806
Dtx3	3.1604079418289	0.140595009157916
Dtymk	-0.456504661738118	0.633486601949119
Dusp1	1.47592235455623	0.129547219577793
Dusp10	-0.502750300274738	0.59428385377278
Dusp11	-0.316314058100253	0.610336157910773
Dusp12	1.12402358161681	0.196111439272126
Dusp14	0.212977956923082	0.744521470021958
Dusp16	-0.0985489517462882	0.927196708417142
Dusp18	1.77435535766772	0.0559624792321884
Dusp2	0.964010420172571	0.916397863592713
Dusp22	-1.60826745136552	0.181919532270103
Dusp23	1.91584106020154	0.0804409751515423
Dusp26	0.0112604592064431	0.982228661469915
Dusp28	-2.70483716765482	0.0653270236585462
Dusp6	-0.410543675122403	0.529784593772336
Dusp7	0.320952501092393	0.617365199892124
Dvl3	2.60897368730227	0.0521643395524113
Dync1li2	-1.48093017283096	0.220298616308701
Dynll2	1.03300211815533	0.118392008092376
Dynlrb1	-1.23967446102819	0.0779233198468454
Dynlt1a	0.491031006501036	0.607597115354647
Dynlt3	0.00894656714107181	0.85917536000418
Dyrk1a	-0.394314730278448	0.488407795691517
Dyrk2	4.66363211142673	0.282460975191617
Dzip1	-0.439963009122824	0.920465674733004
Dzip3	1.31847756812512	0.0922873059573666
E130308A19Rik	1.07026189896169	0.378523455294522
E130311K13Rik	1.4338426705248	0.161938914255413
E130317F20Rik	-1.78192025013227	0.296430049499265
E230008N13Rik	2.67930417312097	0.0779233198468454
E2f1	0.328846766536186	0.666244579403931
E2f4	0.55870533593789	0.36716545601185
E330011O21Rik	0.981960340977454	0.122524989452056
E330012B07Rik	0.609563496040767	0.390431892663721
E330020D12Rik	1.5621313690357	0.242043959946191
E330023G01Rik	-1.67002634411124	0.246472864075504
E430025E21Rik	-1.00457420998012	0.0925862520203628
E530011L22Rik	1.96302349594398	0.548086705202267
Eaf2	-0.924496673309464	0.186011611305239
Ear1	1.32752049946491	0.300246825901994
Ebp	-1.58522992439464	0.059144905442226
Ecd	0.384646823484522	0.4736247009172
Ece1	-2.7882895723987	0.135311888220356
Echdc2	-0.324210649035782	0.665973933195007
Echdc3	0.514465691386983	0.727560993093531
Eci2	0.611317353685064	0.738239257893608
Ecm1	2.74162378292209	0.377882398975443
Ecm2	0.505857665608331	0.627729803054634
Ect2	-0.208298584733014	0.746033924416142
Edc3	-2.72840686922871	0.0974949735264434
Edem1	0.0730527169844101	0.932693459772077
Edem2	-0.815317436589503	0.602813644914161
Edem3	-1.98647848651371	0.0747627838882121
Ednrb	0.783547013895368	0.589670622320216
Eea1	-0.0247641414759779	0.935550133287945
Eef1a1	0.281949968747675	0.686802845301936
Eef1b2	0.689438754455211	0.301951655452047
Eef1e1	-1.53996139899041	0.102033296356563
Eef1g	-0.985208284922472	0.25107943779526
Eepd1	1.58924799630821	0.36933271404806
Efcab14	0.916662573221763	0.117427027511352
Efcab3	0.93154747920422	0.438149799484264
Efcab5	0.657991148193986	0.712954358006944
Efcab7	1.48936619284957	0.137460965402185
Efcc1	-1.03990086782046	0.466700846881909
Efhb	0.979684668043077	0.560150626435369
Efhd1	0.915036390896719	0.181600441576367
Efna1	0.9522633138183	0.525844395087121
Efna5	-0.593031887872437	0.710820768067189
Efnb3	-1.51753323205172	0.341475921264846
Efr3a	0.00860335238117448	0.986291672884119
Efr3b	1.03378841471313	0.211425777246854
Eftud2	0.3854191531475	0.600668882298868
Egf	-0.24389920336701	0.82831582642399
Egln1	0.740473159442304	0.285406503857542
Egln3	-2.20192287411081	0.331714440196039
Egr1	0.513811089509043	0.487282984184777
Ehbp1	0.897934572275511	0.130644466557408
Ehbp1l1	-0.998019559167962	0.433091640593358
Ehd1	-0.397933675379325	0.819487563867212
Ehd3	1.74039863604588	0.0662885478622494
Eid1	1.58206960440281	0.285685798991327
Eif1	-0.449080294462728	0.462461950345623
Eif1ad	-1.30860399257512	0.069452484012206
Eif1ax	-0.0391841665556686	0.929879774913183
Eif2ak1	0.928729394854333	0.147504564741317
Eif2b3	0.0100219506401967	1
Eif2d	0.468920673836901	0.523080416803207
Eif2s2	0.285001722050429	0.666413522820579
Eif3d	-1.05343059922396	0.353891772411764
Eif3e	-0.862416008740197	0.385439460020258
Eif3i	0.800858494974785	0.242684314251964
Eif3k	-0.270723263673433	0.809259948347766
Eif4a2	-1.17103223957676	0.391725813794046
Eif4b	-0.241279958264961	0.767125252432714
Eif4e3	1.09682269732454	0.0532960725612479
Eif4ebp2	-2.05259863883806	0.0896113960257718
Eif4ebp3	0.216803112653761	0.930397182639398
Eif4g1	-0.430831215962668	0.829018386742427
Eif4g2	-0.451634181222323	0.593948095334582
Eif4g3	1.16903942936467	0.112961953429189
Eif5a	0.104927945543501	0.836174152349881
Eif5b	-0.079702589218049	0.751093486662692
Elac2	3.51493208079483	0.125122042610199
Elavl1	-0.882249490889129	0.352971327895738
Elavl2	0.630159094845245	0.219777924759413
Elavl3	1.04240613755897	0.328422237098506
Elf1	-0.209366970131523	0.615334879481877
Elf2	1.0214761775484	0.236241254183685
Elf3	-0.176471364273337	0.716731948319781
Elf4	2.04371546405104	0.0650930913329247
Elk1	-0.530552193405746	0.551834702242849
Elmod3	-0.42785919048309	0.487352770554276
Elmsan1	-2.3993651923368	0.233277054399855
Elof1	0.0747048025043543	0.721269100457574
Elovl4	-1.18022588673886	0.339854649840429
Elovl5	1.88893443366042	0.461302438301245
Elp2	1.09375297184228	0.183478461728751
Elp4	0.383576233919123	0.714145158084951
Emc10	1.21427098030703	0.240723142792083
Emc6	-1.15141481503291	0.131434428389261
Emc7	-0.234816049037455	0.82206070037627
Emc8	-0.725704172462442	0.235780314028484
Emd	-0.210825935534225	0.744810156758029
Eme1	-0.973798561385891	0.351640245415075
Emg1	-0.467030958650011	0.721181109183255
Emilin2	1.46538359352413	0.153809068305199
Eml5	-0.718356659108414	0.331714440196039
Eml6	3.27714188244777	0.0598162295020191
Emr4	1.56152211842259	0.217753564317958
Emx2	0.964484398990937	0.664042949350767
Enc1	-0.746859053809698	0.617431792989506
Eno1b	-1.46204692803644	0.125122042610199
Eno3	-2.964751706444	0.109357665917406
Enoph1	0.402134812434475	0.65713788531801
Enpp4	1.56186318771657	0.119908693572936
Enpp5	1.61179039760685	0.0867090699670015
Enthd2	-2.0696961983766	0.136888799344137
Entpd4	0.260272038346909	0.797096871155305
Eogt	2.37901334610395	0.06074644788242
Ep400	0.835713874819065	0.148996686760016
Epas1	1.78122464396209	0.187038192661188
Epb4.1l5	1.08396363562754	0.173546435955
Epc1	0.945271252811645	0.144833805203872
Epha10	-0.874770531078311	0.659048556753469
Epha3	-1.35379985335773	0.303646080551368
Ephb4	-0.425669876051687	0.738624121134567
Ephx2	-2.44044136189452	0.0916679706119664
Epn1	-0.99502826624798	0.191930951393831
Eprs	-0.978068153570471	0.119328258693367
Eps15	0.838809237627145	0.118718219255398
Eps15l1	0.729671929344997	0.359662969103472
Ept1	-0.100682621871283	0.951860348062109
Eral1	-2.34341294576	0.115808157563303
Erap1	-2.56904068952829	0.0551392378581686
Erbb2ip	1.02077094733769	0.583493971030983
Erc1	0.770974025852934	0.44207374686112
Erc2	0.858942218855616	0.224111676387641
Ercc4	-0.258959272017642	0.600023451836445
Ercc5	0.881783361457734	0.72342364127789
Ercc6l	-0.808911830511599	0.194213600280956
Ercc6l2	-1.0571979846808	0.202197567531779
Ercc8	-0.436978894569477	0.763716648577641
Ergic2	0.339463614268009	0.605987855639295
Ergic3	-0.160278365967053	0.863107178299071
Erh	0.879548307522696	0.133496701708193
Eri1	-0.743602258200639	0.708588771186804
Eri2	0.17194680413721	0.751126750821154
Eri3	0.737205078025479	0.534163505550267
Erich1	-0.559822711717365	0.707219968071702
Erlec1	1.34309267895707	0.297439722972709
Erlin1	-0.424890911648845	0.583632442112458
Erlin2	-1.4127559522546	0.561546498342521
Ermard	1.11448198488129	0.462316059329344
Ermp1	0.0456050854091323	0.980565632610704
Ero1l	-1.21503226766127	0.0777979265737197
Erp29	-0.852773241794198	0.318998557572444
Errfi1	0.569016574897975	0.335236873359917
Esco1	0.0109982521360613	0.857570881474696
Esd	2.01124624268301	0.0975719496811407
Espl1	-0.896021378461836	0.252692369647709
Esrp1	0.525290851272464	0.468220919939029
Esrrb	0.0663644585983533	0.825590478147982
Esrrg	0.822840531524093	0.169955163474913
Esyt1	-0.0972965856065511	0.91741369771716
Esyt2	0.232232187343743	0.57628150914316
Etaa1	-0.314590150373425	0.772003754443539
Etfa	-0.0896589083550708	0.964813371245251
Etv3	-2.20502705949873	0.580084328122869
Etv6	-2.61596313224147	0.0820809725922322
Evi5	-0.59494290029869	0.463036722175578
Evl	1.93110532491433	0.0797570259632965
Ewsr1	-0.591468676331509	0.513201941459473
Exd1	0.212812225209929	0.749649672615543
Exo1	1.04599067881306	0.104267210449003
Exoc2	1.23319322721626	0.112215313986972
Exoc3	-1.1413521182987	0.203167322312476
Exoc4	0.395929627297841	0.857570881474696
Exoc5	-0.307085923891387	0.707581191134525
Exoc6b	0.791485954846216	0.749011469573384
Exoc7	-2.20510295044156	0.112303551617783
Exog	-2.58003892891799	0.0944203065014832
Exosc3	-0.689262885237651	0.256553389246276
Exosc4	-0.933898413072913	0.502247106893133
Exosc7	-0.326920457164862	0.615763938720143
Exosc8	0.397193792060432	0.497042602488288
Exph5	2.22615137445343	0.260135026565707
Extl3	1.27748954582117	0.26521276601677
Eya3	0.148314006008498	0.811628809853693
Eya4	-0.172260643731596	0.92274563401019
Ezh1	0.81977672534199	0.281579921841368
Ezr	0.413365140452882	0.648967482127734
F13a1	-0.471288438655803	0.873402106228399
F2	-0.480765165783365	0.619676584746333
F5	8.8155262172023	0.0863139709666795
F730035M05Rik	-1.71505586034066	0.0513471008691935
Faah	0.711577826211421	0.668048711969115
Fabp4	2.58054104518073	0.467572524634719
Fabp9	-2.42004347102311	0.134873804041204
Fadd	0.793110747654207	0.325696364327564
Fads1	0.607071402611605	0.666244579403931
Fads3	0.292926443559908	0.876188423068849
Faf1	0.439562304605123	0.490591168202663
Faim	-0.0137896421973561	0.935829664509877
Fam101a	-3.62715311557668	0.256420385169865
Fam102a	-0.666693036667993	0.513201941459473
Fam102b	-0.850860011681639	0.517010647045912
Fam103a1	0.7813364964743	0.123030655709451
Fam105a	-0.431594207123983	0.846539419486298
Fam107b	-0.0215444779121321	0.943823757348547
Fam111a	2.31305500993919	0.431334941042609
Fam114a1	6.7920844420178	0.181112877393584
Fam114a2	0.734014263261062	0.36646893016112
Fam117a	-0.325392324485366	0.571809802981483
Fam117b	0.294686914098244	0.563322969162638
Fam118b	-0.303216726016547	0.54665695059797
Fam120a	-0.0692718371894613	0.86137172478039
Fam120aos	-0.447856214123906	0.946642737876455
Fam120c	1.37977018312193	0.279847307843619
Fam122a	0.990400361049751	0.182061670503684
Fam124a	-2.28461170342961	0.29194284538601
Fam126a	-0.608444864977332	0.587878964965652
Fam126b	0.349611091366337	0.531655417536157
Fam129c	2.29585829395354	0.167318778186929
Fam131a	1.73815772498837	0.143293367396381
Fam132a	1.01151942044467	0.198758592233051
Fam132b	-0.260342164088426	0.961083021906977
Fam133b	0.592213468021197	0.326942927404547
Fam135a	-1.200457464813	0.177731350494479
Fam159b	-0.613020553608344	0.938851864074776
Fam160a2	0.581767282274	0.566993139714881
Fam160b1	1.36180277992062	0.39098282005054
Fam160b2	-0.725415378592675	0.263251400051944
Fam161a	3.43615160796205	0.0735016533484676
Fam162a	0.440913043257575	0.658651318979463
Fam167a	0.151813580258852	0.827516753916231
Fam168a	0.835102528377637	0.227181939181004
Fam169a	0.759708326482669	0.454415653508566
Fam171a1	1.06184848638459	0.509069274749908
Fam171b	2.78760428495706	0.0752812191621962
Fam172a	0.57607961219868	0.226307193400541
Fam173b	-0.0256198187932339	0.98318792517499
Fam174a	1.01565069940854	0.379549207582908
Fam174b	-1.69380486603015	0.345030447483719
Fam178a	-0.159670334230274	0.92781297557741
Fam178b	0.722864446542904	0.336829232743961
Fam179b	0.351000328973385	0.795961720260655
Fam184a	0.785385807667936	0.256541181437455
Fam188a	0.718689245311151	0.15644031863704
Fam188b	0.168153210303595	0.979104873823668
Fam189a1	0.225675499835634	0.950383716454465
Fam189b	0.394972133171471	0.639638332143616
Fam195a	-1.37463823397368	0.328301620902148
Fam195b	-2.34231624363653	0.051447119224223
Fam199x	0.125518316336048	0.670167195272906
Fam19a2	-2.25720587910419	0.194428653358981
Fam19a4	2.21347188352759	0.0508134426084832
Fam204a	-1.47713691849078	0.165406145093631
Fam206a	-0.264351189940633	0.930397182639398
Fam208b	-1.04335134923792	0.100586888196468
Fam21	0.94074042108484	0.146053783993375
Fam210a	-1.1077178344532	0.0830455340899816
Fam210b	0.993253572451525	0.375020596266772
Fam214a	0.940955856174835	0.136478531449849
Fam214b	-0.717540737451861	0.481224859435046
Fam216a	-0.663341727249691	0.239137212206649
Fam219b	-1.45184101681089	0.36052059222297
Fam220a	0.464031178117453	0.388132101814445
Fam221a	-0.342091936113616	0.584469703050434
Fam227a	-1.50436071239392	0.148287057684623
Fam3c	0.93196714899935	0.103762145698954
Fam49a	0.758631022069211	0.288778936838438
Fam49b	-3.13156419733589	0.327514331409613
Fam53c	0.191737470900236	0.802083288236267
Fam57a	1.59781478015559	0.348273543727788
Fam58b	-1.88788973626584	0.0515426922988535
Fam63a	0.972916365223627	0.110934603022452
Fam65a	0.332839200513922	0.863107178299071
Fam65b	0.863769523360233	0.560006713073848
Fam69a	-1.03371682697494	0.254398348572277
Fam72a	-1.08287336444975	0.0823545914106908
Fam83a	-0.491133243789499	0.736776588260066
Fam83g	-1.38972106067075	0.243125359523471
Fam84a	0.108435179886225	0.803278199619254
Fam84b	-0.269543773107279	0.842988394037981
Fam96a	0.21630630976877	0.740102616160396
Fam98a	-0.908450980104617	0.240013908905281
Fancb	2.98444034791556	0.08516235533229
Fancd2	0.489720543029598	0.601540505123635
Fancd2os	-0.598704936672608	0.469170496771005
Fance	-0.330425915603392	0.737869826587209
Fancg	-1.34042348079352	0.44942753167019
Fank1	1.24040447532802	0.0855255733564703
Farp1	1.02226294575436	0.105328578761128
Fars2	1.69321718107637	0.131539567987904
Farsa	-1.17254227013506	0.212246440919225
Fastkd2	0.313298559375986	0.57164360244345
Fastkd3	-1.19300086358099	0.082354646435833
Fat1	-0.454998799711006	0.513201941459473
Fat3	1.3972066514475	0.50516029882407
Fate1	0.885002926502371	0.430366978717708
Faxc	-0.841761465059295	0.68867170664458
Fbf1	-0.210981357571558	0.960842276731797
Fbln5	3.86629217311055	0.0599431705022302
Fbn1	-0.554923301708296	0.608399178450174
Fbrs	-0.454587446453562	0.603537857867002
Fbxl14	-0.390723631960757	0.636383846130064
Fbxl21	0.791142130193479	0.639969307618646
Fbxl3	-0.90464433136211	0.333591184734614
Fbxl4	0.625853080504367	0.587878964965652
Fbxl5	0.120414209513849	0.648701377613035
Fbxl6	-0.478155823723931	0.820813340918114
Fbxl7	1.4099341211607	0.360644145974012
Fbxo10	2.06329614464676	0.0715114353013014
Fbxo11	-0.379380456448283	0.603764630941936
[truncated: 4,148 more rows]

## Sheet: Table1-sup1_Allgenes_Oocyte
id	log2FoldChange	pval
0610005C13Rik	-Inf	0.198402327279899
0610007P14Rik	0.511313093836229	0.718616308270824
0610009B22Rik	1.86704183338756	0.00549784276766558
0610009L18Rik	-0.785988075738846	0.836669584170845
0610010F05Rik	-1.88807076073925	0.0113867249670102
0610010K14Rik	2.0312290556555	0.00938681274809912
0610012G03Rik	1.08781259262836	0.0687421868035646
0610030E20Rik	0.226043417780643	0.986429488447816
0610031J06Rik	0.310528084248187	0.706930133196272
0610037L13Rik	1.60773735738206	0.132234693545111
0610040B10Rik	Inf	0.304339043069978
0610040F04Rik	-0.149732328157044	0.956312055877469
0610040J01Rik	2.0992121152475	0.0413095097389626
1110001J03Rik	1.46912671741883	0.044611262688674
1110004E09Rik	-0.326271789899436	0.579164858833018
1110004F10Rik	0.72838757587877	0.313262829248116
1110006O24Rik	1.07728341071177	0.865439835695945
1110007C09Rik	4.02551099126925	0.0328321963318053
1110008F13Rik	-0.565444708000607	0.412246482927286
1110008L16Rik	-1.37170114853181	0.401470804141676
1110008P14Rik	2.57737948134339	0.104406765753414
1110012L19Rik	-2.59849000186417	0.0134649439611147
1110019D14Rik	-0.783784221195421	0.455731163163058
1110020A21Rik	0.709653603344962	0.478218295073993
1110028F11Rik	-Inf	0.372941042325515
1110028F18Rik	Inf	0.151229456924076
1110032A03Rik	2.26167035687299	0.256368308481814
1110034G24Rik	0.712023823074867	0.421207514952259
1110037F02Rik	0.345846343919208	0.676858537761103
1110038B12Rik	-0.530823151093069	0.798343440117386
1110038F14Rik	0.416916966178337	0.613119773733713
1110051M20Rik	0.57213686114404	0.538333739666436
1110057K04Rik	-0.64615859514159	0.589362482791456
1110058L19Rik	1.18518706416376	0.0638493813569028
1110059E24Rik	1.1821137040052	0.0378545227012931
1110059G10Rik	0.727905643340117	0.289664044007266
1190002N15Rik	-2.45766345903753	1.40163284967922e-05
1190005I06Rik	0.470244113683958	0.813382034449576
1190007I07Rik	0.941894407288126	0.494028319803756
1200014J11Rik	-1.39720785861319	0.0467376255018073
1300002E11Rik	5.38164935793726	0.000368460330953684
1500011B03Rik	-0.612873695898269	0.221175411727407
1500012F01Rik	0.420337727412671	0.243849524314795
1500015A07Rik	-1.34006358877442	0.146801251279094
1500017E21Rik	-1.37948170822567	0.0822600109197323
1600002D24Rik	3.04929974435335	0.0374306874920408
1600002H07Rik	1.65068400890118	0.035215127480243
1600002K03Rik	-Inf	0.961342814758795
1600010M07Rik	-Inf	0.959745271068634
1600012H06Rik	-1.68777431496819	0.00825033652946434
1600020E01Rik	1.44922394204908	0.114304606578314
1600025M17Rik	0.580394839011456	1
1600029O15Rik	-1.43649280341967	0.316422776492808
1700001L05Rik	-0.0996232915471184	0.601341535989528
1700001L19Rik	2.67561553457344	0.0702733878028506
1700007J10Rik	-0.336715359307991	0.725662601728543
1700008J07Rik	-Inf	0.0111738220101341
1700010D01Rik	2.76694438514504	0.0225474912039465
1700010I14Rik	-0.880742369157069	0.391366289547099
1700013H16Rik	-Inf	0.583057699273372
1700017B05Rik	2.98982017286346	0.0901771681720323
1700018B08Rik	1.3178093199634	0.167277087849479
1700018B24Rik	1.61310088907961	0.0381253432563982
1700019G17Rik	Inf	1
1700020I14Rik	-0.521430270081957	1
1700021F05Rik	-1.98016183172725	0.131646411014619
1700021K19Rik	-0.904510842054693	0.0843361123454429
1700023E05Rik	0.433204903681133	1
1700023L04Rik	0.300225013911129	0.899193679964296
1700024P16Rik	3.05585254269163	1.094136407241e-05
1700025G04Rik	-0.817148572606759	0.611408760138228
1700025N23Rik	3.6045687160555	0.110289600135587
1700028K03Rik	2.18345904882756	0.00750775935482243
1700029F12Rik	Inf	0.00551499322571357
1700029P11Rik	-0.590827470688766	0.221733046102138
1700030C10Rik	0.348296903778412	0.944880431533986
1700030J22Rik	0.80515546263251	0.902482769166357
1700030K09Rik	0.20542041817633	0.946386865363604
1700030L20Rik	-1.78134498419766	0.372605020384543
1700034F02Rik	Inf	1
1700034H15Rik	2.29020981502259	0.126817466504379
1700037H04Rik	-0.0345259192528252	0.859994185823584
1700042B14Rik	-1.06604931783485	0.12103281584475
1700047E10Rik	-0.829594550842485	0.615860598498183
1700048O20Rik	-2.84606788055503	0.00162056229176784
1700049G17Rik	2.95361520989644	0.194053339614256
1700052N19Rik	-0.565143962938336	0.587345406730984
1700061G19Rik	-Inf	0.515909089064523
1700063D05Rik	1.41019114496155	0.576386382680527
1700066M21Rik	-3.66675779591826	1.46793968766599e-08
1700067K01Rik	1.90402416472625	0.395129625428558
1700069L16Rik	3.30107160746095	0.138863236522703
1700084F23Rik	1.22387467751383	0.458779363526072
1700086O06Rik	1.8743731014676	0.369075230609206
1700091H14Rik	0.144917211629142	0.952087403358
1700093K21Rik	3.99213331662539	0.0139592642744029
1700094D03Rik	-0.69816793626716	0.308327745404718
1700096K18Rik	-2.06141939881617	0.552564060801751
1700109H08Rik	-0.260614925806163	0.997590310028935
1700113A16Rik	2.46006678135342	0.0490271487389747
1700123I01Rik	-0.791764742695392	0.584373553240723
1700123O20Rik	1.28125611182551	0.608760806666089
1810010H24Rik	0.10956029000928	0.919765089573037
1810013L24Rik	-1.01839674863625	0.0487988087535317
1810022K09Rik	0.605325167777104	0.407660696110038
1810026B05Rik	1.38513781089033	0.398025289030159
1810026J23Rik	-0.58535673114201	0.513767852944422
1810030O07Rik	0.982780839771482	0.0137836411316501
1810032O08Rik	-Inf	0.96059319559687
1810037I17Rik	-0.658990632436635	0.231878363981427
1810041L15Rik	-2.19650533662225	0.00637299769253833
1810043G02Rik	-1.16015699028424	0.145910303789872
1810043H04Rik	1.75691481248429	0.235686727068208
1810044D09Rik	-1.35894713395232	1
1810055G02Rik	0.776882718179669	0.174297275820384
1810058I24Rik	1.4642312717101	0.0111122800921086
1810062G17Rik	0.664041042104955	0.818336759301559
2010002M12Rik	-1.43800653919954	0.311443404748863
2010005H15Rik	0.968636662440567	0.456470260926199
2010012O05Rik	-0.265105437476412	0.885073252955512
2010015L04Rik	-3.73605674344618	0.138734244240831
2010107E04Rik	2.73467084156398	0.000193125782824326
2010107G23Rik	-0.19866268937405	0.666625281636575
2010111I01Rik	-0.58415047369882	0.387874118081453
2010315B03Rik	1.08585610325137	0.374144726111388
2210011C24Rik	0.743939961031566	0.622351171591866
2210013O21Rik	0.762353586725584	0.321047254783728
2210015D19Rik	0.986797569322145	0.294087707614092
2210016F16Rik	-2.52222934185517	0.184742938769076
2210016L21Rik	0.31175444325209	0.890172863180473
2210018M11Rik	0.800913838502147	0.517856498032909
2210039B01Rik	1.62856565742423	0.0245798545687869
2210408I21Rik	-0.750365891649358	0.751704136463561
2210409E12Rik	0.53175785626389	0.233390511154946
2210417A02Rik	3.87998917542695	0.0172195533790483
2300002M23Rik	1.27755106747087	0.120594386594377
2300009A05Rik	2.11199009230728	0.0140625527195641
2310009A05Rik	1.79598839493383	0.236851137360421
2310011J03Rik	-0.706279759515182	0.939666265147115
2310014L17Rik	Inf	0.66536112160327
2310015B20Rik	0.287515074721174	0.87889338359428
2310022A10Rik	-0.157323385562827	0.594269578870858
2310022B05Rik	-0.994181286319372	0.0709204500701135
2310033P09Rik	1.11645698652941	0.456493444788359
2310035C23Rik	0.308630902067163	0.710843958943496
2310036O22Rik	-1.88159182387485	0.0353668209469387
2310039L15Rik	-3.44332615084048	0.0305742425739806
2310040G24Rik	-Inf	0.0142470318446919
2310047M10Rik	-Inf	0.300633383487802
2310057M21Rik	0.48226882825947	0.430500599362098
2310061I04Rik	0.192455123769641	0.972644744147325
2310069G16Rik	0.899794281846823	0.12809318424561
2410002F23Rik	-0.609584972750929	0.969094680583192
2410004B18Rik	-0.114294138994691	0.869290363023944
2410006H16Rik	0.306158055704534	0.779116893791082
2410012M07Rik	-0.621473967713158	0.149053478892324
2410015M20Rik	-2.09728277120999	0.224073514830114
2410016O06Rik	-Inf	0.00264850830794979
2410018L13Rik	0.130920910283478	0.662920197861091
2410021H03Rik	1.13102402043931	0.187926308511757
2410089E03Rik	-0.0738367565768956	0.632780284946106
2410127L17Rik	1.01156421030163	0.0476999655172839
2410131K14Rik	0.969568664268237	0.644961833668907
2410141K09Rik	2.32688585558875	0.148634958788489
2500004C02Rik	-1.5223530704131	0.150252583651217
2510003E04Rik	0.568873083743545	0.129287435820573
2510039O18Rik	0.485252934034968	0.786526759593623
2610001J05Rik	1.27334281956514	0.0507610356152829
2610002J02Rik	0.970457716224297	0.229944162591183
2610002M06Rik	-0.266963946603638	0.544344275541897
2610005L07Rik	1.63196663249395	0.400324582775202
2610015P09Rik	-0.741143396275158	0.412315730612446
2610020C07Rik	-1.22106240545003	0.430644560729899
2610020H08Rik	0.136068506370518	0.866044177008175
2610034B18Rik	0.566948864701343	0.946304365847032
2610034M16Rik	-1.01095986975295	0.425201436571032
2610037D02Rik	0.834672379538144	0.29168006784947
2610044O15Rik8	-1.0900673094814	0.94626865277579
2610203C22Rik	1.03306742141089	0.602809265913373
2610305D13Rik	1.01866735207618	0.0702533465885015
2610316D01Rik	2.82694611718749	0.264832202291397
2610318N02Rik	-Inf	0.0132130187819139
2610507B11Rik	1.9601346217854	0.0413244321985645
2610507I01Rik	0.877395911669784	0.0103668171118013
2610524H06Rik	0.456269409714993	0.510554183634777
2700029M09Rik	-0.37820098823289	0.361375342173582
2700038G22Rik	-1.5678149666125	0.0867617067842864
2700049A03Rik	0.166995259008097	0.932515447209225
2700054A10Rik	-0.923063738765668	0.26013226099253
2700060E02Rik	-0.296607824087539	0.435711683264376
2700062C07Rik	-1.10207480051295	0.133328093900597
2700081O15Rik	-1.06676568465583	0.770673750349548
2700094K13Rik	3.59865672793085	1.82904202357635e-05
2700097O09Rik	1.24084895449795	0.150526525039792
2700099C18Rik	0.387517501137947	0.608701585961665
2810001G20Rik	0.784821766439443	0.767217131446039
2810002D19Rik	-0.266739612125652	0.928192592211402
2810004N23Rik	5.17372951068216	0.00741250651206643
2810006K23Rik	-0.0558424836637497	0.906269686956252
2810008D09Rik	-0.905469489931266	0.949962535324321
2810013P06Rik	-0.165809383010039	0.74292269797248
2810021J22Rik	-0.511585004424459	1
2810025M15Rik	-1.07997103564765	0.141790668647132
2810403A07Rik	-0.386938417983608	0.337904266449374
2810403D21Rik	0.414341357161368	0.585637839714429
2810408I11Rik	-0.921356406092322	0.0835193517695073
2810408M09Rik	-0.614449215227691	1
2810474O19Rik	0.0204632680777136	0.841328634221425
2900026A02Rik	0.523156249660924	0.218081840983766
2900057B20Rik	4.14683995132711	0.0507700477497249
2900092D14Rik	NA	NA
2900097C17Rik	-0.728350562922976	0.510388529371802
3000002C10Rik	2.22594528226867	0.140766465937902
3010026O09Rik	-2.62130684853379	0.0159666103426939
3110001I22Rik	-0.590304188250894	0.231416494825422
3110002H16Rik	-1.77204133356257	0.00102321916137394
3110007F17Rik	0.145747431070052	0.767811145337087
3110009E18Rik	0.259101784322618	0.895300410265214
3110040N11Rik	1.67815101589708	0.0375111368650124
3110043O21Rik	2.52122533719416	0.000455468821325406
3110045C21Rik	-3.82331196451612	0.0419867671983764
3110052M02Rik	-3.54647576607091	0.00251200610655172
3110057O12Rik	-2.64102670114777	0.00218780539115956
3110082I17Rik	0.208362265208537	0.778491100604067
3830406C13Rik	-1.00735360887708	0.220570720706694
4632415L05Rik	NA	NA
4831440E17Rik	Inf	0.0180358939620509
4833417C18Rik	-1.81395979457725	0.272926227184384
4833420G17Rik	-2.5126246377367	5.59476888419945e-05
4833439L19Rik	-0.0301273941961673	0.766123947189145
4921507P07Rik	NA	NA
4921517D22Rik	0.140463201486413	0.853721812576849
4921524J17Rik	0.583718298357923	0.20742865493754
4921529L05Rik	-0.675373826331297	0.39107388766959
4921531C22Rik	0.659152193136821	1
4921536K21Rik	2.67117516221477	0.163780903695733
4930402H24Rik	-0.0669383152898864	0.8505330729089
4930404A10Rik	Inf	0.0789834494728428
4930413G21Rik	-Inf	0.9611642318505
4930427A07Rik	Inf	1
4930430F08Rik	1.12378212410495	0.440749724412171
4930430J02Rik	NA	NA
4930432K21Rik	2.36184862806555	0.0232979435483867
4930444P10Rik	-Inf	0.061973128969819
4930447C04Rik	Inf	0.0455087431500697
4930451C15Rik	1.46024741479092	0.442484808054972
4930451I11Rik	-0.181501596943541	1
4930452B06Rik	-0.782485473138756	0.279685767429379
4930453N24Rik	0.451352703197137	0.171798040646203
4930470H14Rik	4.89691290839001	0.049003877201825
4930473A02Rik	0.410830735868626	0.703336723597937
4930481A15Rik	2.28351461977027	0.330683870477798
4930483K19Rik	0.61378049290409	0.969847544849815
4930486L24Rik	-0.137190172663727	0.917543245643487
4930500J02Rik	0.528162458283127	0.485526858253069
4930500L23Rik	4.17719419164079	0.00522843614692319
4930503E14Rik	-0.0384523120423084	0.506802738733199
4930506C21Rik	-2.04262722416915	0.321787287099626
4930506M07Rik	3.05990169651469	0.000231000253271079
4930509E16Rik	2.65731999100127	0.0493929988704241
4930511M06Rik	2.88114897179566	0.0720369066630795
4930513N10Rik	Inf	1
4930515G01Rik	-0.220127769462736	1
4930519F09Rik	-1.15305395758428	0.471594189769655
4930519G04Rik	1.91941448885118	0.314492939407328
4930528D03Rik	1.62733897660381	0.132762442969423
4930538K18Rik	-3.76144636381031	0.61846300734323
4930539E08Rik	-2.43598175316468	0.000496785621517691
4930548H24Rik	4.33046645148405	0.0134567205867127
4930550C14Rik	3.0855921490028	5.03667196368249e-05
4930550L24Rik	0.899344535648885	0.357109762726236
4930556J02Rik	Inf	0.896818179473003
4930558C23Rik	-0.166743322197715	0.897749712341061
4930568D16Rik	3.63885406216333	0.108693468888192
4930568E12Rik	1.20385374982394	0.296377006799222
4930572O03Rik	1.26916164253541	0.475043629829363
4930579F01Rik	Inf	0.219458065079684
4930579G24Rik	1.22674089898379	0.431322844031546
4930593A02Rik	1.58659391677221	0.268576075321449
4930599N23Rik	-2.05449603744807	0.216424835940313
4931406C07Rik	-1.12201387813978	0.0220122749039223
4931406P16Rik	-0.0785225263685663	0.738521441740564
4931409K22Rik	Inf	0.178465413267737
4931428L18Rik	-0.772413025129368	0.131321196343272
4932438A13Rik	0.621818419131328	0.160070750290402
4933402N22Rik	1.50862286654913	0.3489196633859
4933404O12Rik	0.86604825471937	0.557701482235995
4933405D12Rik	0.375409605222895	0.760196897216288
4933406C10Rik	Inf	0.574519251062254
4933406J08Rik	Inf	0.00452088628422783
4933407G14Rik	0.13126180579527	0.93780339857643
4933408B17Rik	Inf	0.12276928437465
4933408J17Rik	0.940006555832221	0.571591690726467
4933408N05Rik	-1.16019849842457	0.248447804366411
4933409K07Rik	-3.97220923291991	1.58302104864027e-07
4933411E08Rik	1.66919491982233	0.0942238243307239
4933411G11Rik	0.0817626858521831	1
4933412E12Rik	-0.783266107639379	0.534970593767788
4933413J09Rik	-0.742074068795772	0.947715570633401
4933416M07Rik	0.969678301720661	0.78567516299385
4933417E11Rik	0.45303960492806	0.593222739149626
4933421O10Rik	-0.324101891642985	0.627078987181279
4933424G06Rik	Inf	0.884219864608975
4933426M11Rik	-1.84327245761229	0.00165904126643343
4933427D06Rik	0.470562561181359	0.274768979561713
4933427D14Rik	-2.00891090587499	0.440164789135062
4933427G17Rik	-0.678924425215557	0.451529902203683
4933430I17Rik	-Inf	0.53838012400393
4933431E20Rik	0.495227099413836	0.697308045894876
4933432K03Rik	1.42186496433244	0.115943155297585
4933434E20Rik	1.44899765969016	0.008699489931647
5031410I06Rik	1.0975345041043	0.407254195558211
5031439G07Rik	-0.926748187634524	0.0786445603074573
5430402O13Rik	-Inf	0.321096871277918
5430405H02Rik	0.158516482102782	1
5430416N02Rik	0.0694339190038291	0.962899446899252
5530601H04Rik	-1.13789638022612	0.206848356580055
5730403I07Rik	0.720476585954203	0.415419883677353
5730409E04Rik	1.13865644042388	1
5730455P16Rik	1.00127357701686	0.312091522162286
5730507C01Rik	-3.36879385448285	9.41292696868614e-06
5730508B09Rik	2.19396833598975	0.0883683786875397
5830415F09Rik	Inf	0.145513340911844
5830416P10Rik	-0.140710452261294	0.931023798605863
5830417I10Rik	-0.625860072959741	0.369725843514136
5830418K08Rik	-1.32435249594688	0.0267407072221488
5830418P13Rik	-1.45357701424425	0.579084518734154
5830444B04Rik	0.152731666095212	1
5830473C10Rik	-1.57706392033875	0.514548137984742
5930438M14Rik	-2.15298174453034	0.0284050435105205
6030443J06Rik	-0.135673753520974	0.76457575056331
6030458C11Rik	-2.00963016459458	0.00135957187851624
6330410L21Rik	0.420047427048111	0.572896898882581
6330549D23Rik	-1.38843464273665	0.251190851753388
6430548M08Rik	2.58819532786972	0.123009025186347
6430550D23Rik	0.329549496687775	1
6430573F11Rik	-0.990106637498726	0.511210639717049
6430710C18Rik	1.40630633733725	0.00787910750000752
6720468P15Rik	1.44502007924208	0.0657627812065255
6720489N17Rik	-1.37500462349209	0.092486056995399
6820408C15Rik	4.09949486617938	0.0617430069438838
6820431F20Rik	0.253279978631578	1
7420426K07Rik	0.285193627818288	0.894758464680988
7420461P10Rik	4.45800006697205	0.000416814190998002
7420700N18Rik	-3.10720394900166	0.0141946905736839
8030423F21Rik	-0.310094259454033	1
8030462N17Rik	0.787401173037047	0.247849673456887
8430419L09Rik	0.898009933503016	0.600197359291248
8430426J06Rik	-3.80415636605663	0.00713946537186294
8430429K09Rik	-0.401352054945314	1
9030025P20Rik	0.979901796016715	0.539725083377695
9030624G23Rik	0.385601747841165	0.848786135720372
9030624J02Rik	-0.117992202585558	0.823013551018955
9130011E15Rik	-0.732677509301959	0.428776144892497
9130015A21Rik	1.97002521033491	0.0644652482869002
9130023H24Rik	-0.155694658614466	0.942109541168992
9130024F11Rik	-0.656000366956317	0.608237307174905
9130221F21Rik	1.13055182591143	0.61499715109555
9130227L01Rik	-1.35008822564818	0.343150579573713
9130401M01Rik	-0.202079577229845	0.668585824840804
9130409I23Rik	1.32767382205947	0.0111735532343888
9230110C19Rik	1.69863295213906	0.0406753099509471
9230114K14Rik	-0.0881470765118905	0.902495646766548
9330102E08Rik	-1.10849377239364	0.461498731453128
9330133O14Rik	-Inf	0.959478584584984
9330159M07Rik	-0.679526020724674	0.39360756420627
9330162012Rik	1.91046884207071	0.0777223138101247
9430008C03Rik	-1.47600454291482	0.0983813419792094
9430015G10Rik	-0.863784488939857	0.574968358234869
9430016H08Rik	-1.18495545269656	0.309426386399906
9430020K01Rik	-1.55300478766783	0.284003764909744
9430021M05Rik	1.32315159357796	0.354760674718459
9430037G07Rik	1.62280375312233	0.393190378487573
9430038I01Rik	-1.78833111156916	0.000488828177875338
9430091E24Rik	0.81969930309014	0.549731532311373
9530026F06Rik	-0.706964253147786	1
9530051G07Rik	0.335222422475151	0.793550483603114
9530068E07Rik	0.863614034720044	0.397344039717229
9530077C05Rik	Inf	0.659579883496205
9530082P21Rik	0.259249595327114	0.8200085467704
9530091C08Rik	0.0507330861583332	0.320544143011802
9630033F20Rik	-0.474148969856028	0.405963208526524
9830107B12Rik	NA	NA
9830132P13Rik	-0.470497964586444	0.945117301715783
9930012K11Rik	Inf	0.613629353377426
9930021J03Rik	-0.2481747890294	0.685148272664565
9930104L06Rik	0.0567295391617142	1
A130010J15Rik	0.111244044996215	0.897813383014883
A130077B15Rik	3.36888504479092	0.0660154705970122
A1bg	3.23673876137806	4.56224584476254e-05
A230046K03Rik	-1.34570652239042	0.211137500275975
A230072C01Rik	0.0736223435673701	0.875763331515609
A230073K19Rik	-1.33424025534576	0.664460743631158
A330032B11Rik	-1.14079325479864	0.490353596649946
A330069E16Rik	-1.44301586444626	0.218662049773379
A330093E20Rik	0.968479117812022	0.148879062988682
A430005L14Rik	1.72764178712856	0.0579094401238965
A430033K04Rik	-0.679472457464533	0.135266434180771
A430078G23Rik	-0.578862502655449	1
A430093F15Rik	5.05805071479838	0.00379710460037866
A4galt	2.4112004380031	0.0598208898922213
A4gnt	0.89153880436	0.595514964781377
A530032D15Rik	-0.146387649811496	0.506200988609131
A530064D06Rik	-Inf	0.961212558212803
A630020A06	0.791920862923753	0.740572072848658
A630066F11Rik	-0.52836287146921	1
A630072M18Rik	1.19576682091427	0.449082813194382
A630075F10Rik	2.24799806024467	0.0563333270708763
A630089N07Rik	3.06301078451935	0.0629010420267853
A630095E13Rik	1.30032272766673	0.0418450722433351
A730017L22Rik	3.16419762972801	0.170007254533743
A730082K24Rik	-1.27207596093552	0.349730805203998
A730098P11Rik	-0.818945512806082	0.208789196874309
A830010M20Rik	-1.28127889866985	0.118942484872492
A830018L16Rik	0.142502320491803	0.764706940075459
A830080D01Rik	1.44360689277685	0.333067995157815
A930005H10Rik	0.555860148669008	0.881788360729726
A930006K02Rik	4.26967191739803	0.093405917859517
A930015D03Rik	2.13850898956606	0.0741923602051479
A930017M01Rik	-0.651839153321766	0.593851368298873
AA388235	1.68602582379099	1
AA414768	-Inf	0.000183556888268168
AA415398	-0.638639179319484	0.747656574167458
AA536875	2.81578682909749	0.000229056739194561
AA543186	Inf	0.662465685263905
AA545190	0.295123650183696	0.362552191398019
AA619741	-0.688041196295421	0.114891879520343
AA792892	-1.09405347354114	0.183895087927898
AA987161	0.0904544215753064	0.819624826796566
AB124611	1.03109899457228	0.59047268053348
AF067061	0.0602980924347317	0.92934082151384
AF067063	-1.16740439692084	0.27183956985332
AI314180	0.683760174003362	0.133008890301215
AI413582	0.859384107527879	0.522488408439643
AI427809	2.05155731704363	0.465452488832351
AI464131	-2.00169888943764	0.08462305613051
AI506816	-1.44189770254506	0.306184617500657
AI597479	-1.94272316939416	0.00324944732029499
AI661453	-Inf	0.0332103975158133
AI846148	0.770590749417551	0.33713220896017
AI848285	1.23291841316618	0.337933769999279
AI854703	Inf	0.0441207705591466
AI987944	1.5066974734735	0.0033909781673619
AK010878	-1.17601937158239	0.0518393798447621
AK129341	-2.72991270233778	0.211340050449364
AU015228	-2.25514966895553	0.247011581326605
AU015836	1.21929024744505	0.00435102776455136
AU016765	-1.55287097437518	0.00561636032346207
AU018091	0.148948868227277	0.871590408679771
AU018829	-4.0095918427487	3.4129010576871e-07
AU019823	-0.0382657761718507	0.732228193832421
AU019990	1.44007685565448	0.161758629494024
AU022252	0.236978219739452	1
AU022751	-0.0794203168595872	0.915017551832526
AU022754	-0.652824566182787	0.942507436985686
AU023762	-0.865465888937596	0.363195907770888
AU040320	0.586185075644677	0.453949441714008
AW011738	Inf	0.40203690497374
AW146154	1.26757352897392	0.0136562182556458
AW209491	Inf	0.616065904858281
AW495222	2.86086405518215	0.00284799541147503
AW549877	-0.616552642063379	0.291700633828214
AW551984	2.16090482920863	0.099849373831161
AW554918	-0.501785708863161	0.464658766847932
AY512915	1.93058535425628	0.00932613715230615
AY512931	0.0370740406912907	0.798652138654546
AY761184	Inf	0.0362337778195205
Aaas	1.47081322143262	0.0282925643644227
Aacs	-0.217609366322117	0.927810821249508
Aadac	0.680093085951309	0.473396034923744
Aaed1	0.974820143542082	0.943960646142112
Aagab	0.485962015337391	0.638186901150645
Aak1	-0.982313694478677	0.157546496053028
Aamdc	1.77217372699967	0.046327979748108
Aamp	-0.455198501338819	0.415808739781566
Aar2	-Inf	0.386973602244102
Aars	0.667825769414691	0.308745790254278
Aasdh	1.85941403334351	0.0117926149080898
Aasdhppt	-0.632372504353637	0.595130764792246
Aass	3.01209574222528	0.0165790019187369
Aatf	1.25918387281781	0.507790990854786
Abat	-0.178004102962787	0.725771507951138
Abca1	Inf	0.349252687481457
Abca12	-0.50570441798097	0.886511034718761
Abca13	0.322444292544353	0.636478955569977
Abca14	3.4587037312368	0.00373105934485773
Abca2	0.838568219155781	0.532879221529247
Abca3	2.41532099022247	0.117412002165986
Abca4	4.31558147109147	0.0226383130362245
Abca5	-0.509159918184717	0.58917296276289
Abcb10	-0.7520729287348	0.583509660976507
Abcb11	1.58933383902151	0.516420137444579
Abcb1a	-0.777139862434335	0.602014146238599
Abcb1b	-0.0936046856129161	0.866514411645731
Abcb4	-0.470147499189765	0.798305481559634
Abcb5	-0.540923396645854	0.946386443976356
Abcb6	0.483335505481343	0.303543157148844
Abcb7	0.143982164629161	0.656277051344763
Abcb8	2.66059577890796	0.0840938255393539
Abcb9	1.52438933811081	0.320644154622202
Abcc1	3.33947876844631	0.00405305342932847
Abcc3	-1.81427967854682	0.282484178456487
Abcc4	0.495501757921045	0.293166621829873
Abcc5	0.814285843820928	0.210730541359989
Abcc9	-0.171721642915411	0.82826995716489
Abcd3	1.01983570221999	0.177958128201856
Abcd4	1.30277271072944	0.247444803244844
Abce1	-0.0113248163055204	0.903091937884799
Abcf1	0.789850884792185	0.190163220491489
Abcf2	-2.19314708514662	0.00122016369356509
Abcf3	0.996068541208615	0.0830929131919061
Abcg1	1.32359008718234	0.0719076781860617
Abhd10	0.340451940455109	0.621294838505698
Abhd11	-0.702520071062762	0.113833034193153
Abhd11os	-0.16233933586784	0.688551430442619
Abhd12	0.187158699366458	0.657914400838198
Abhd13	-1.44413736085406	0.00615771284653032
Abhd14a	2.79821147317067	0.0882304816650088
Abhd16a	0.857957020372779	0.238356957103828
Abhd17b	-2.62604841456328	3.19522840085545e-06
Abhd17c	0.293113087901853	1
Abhd2	1.23536312968055	0.690179063565492
Abhd3	-0.928610507204382	0.425246333482134
Abhd4	-0.731668604446595	0.158708624899512
Abhd5	-0.574214971899562	0.383462524350757
Abhd6	1.14275803015375	0.0636463646623361
Abi1	-0.842909478243517	0.142658446157948
Abi2	-0.895874791175276	0.428084662730011
Abi3bp	-0.660340269928741	0.478329131823087
Abl1	-0.454346537371524	0.209717055331143
Abl2	-0.677131682413036	0.308873187843908
Ablim1	-0.115522412484594	0.78530549038932
Ablim2	-0.442900272797358	0.267565115852959
Ablim3	1.75714805484284	0.0692968347934298
Abr	1.31908994183867	0.033489517148516
Abt1	0.976247339251624	0.744872058490298
Abtb2	-0.244115798631841	0.442685844459086
Acaa2	3.48774610989482	0.0110641112913209
Acaca	0.234234183521194	0.767918751095797
Acacb	-0.181572420521637	0.737664309481656
Acad11	2.03027443075945	0.00159134952714999
Acad8	-3.31835306762709	0.170655385137947
Acad9	-1.49133941497011	0.346952332935472
Acadl	0.365740234024807	0.745525707365566
Acadm	0.288309825605055	0.619861828289128
Acadsb	-0.584895374923649	0.119063934729082
Acap2	-0.698391577513132	0.0897658083659559
Acap3	1.3260406906181	0.506433522207046
Acat1	-0.713027112161464	0.174450269605991
Acat2	1.34133413416874	0.0413890561592513
Acat3	2.10002179845356	0.0287846348454897
Acbd3	0.492222809316757	0.252780189457537
Acbd5	-0.658885121886525	0.285715783568139
Acbd6	-1.0157189176953	0.142759547620045
Acbd7	2.11171146917674	0.00449136870984672
Accsl	-0.425880669055197	0.323928423570212
Acd	0.136436409793284	0.82665539504404
Acer1	1.99858728274413	0.0441240275345128
Acer2	-1.40139928092167	0.284154644038838
Acer3	2.8895976454312	0.00650783540264054
Acin1	2.88849968964884	0.0237965041486323
Acly	-1.53777203246271	0.00602311068991591
Acmsd	0.769974062069936	0.595374317959696
Acn9	-1.35787979615391	0.560538700705897
Acnat1	Inf	0.41951963573604
Aco1	1.93693888082387	0.0168457450071448
Aco2	-0.395103980610173	0.877140391591235
Acot10	0.750634858209117	0.460046641889945
Acot11	1.9462359665741	0.102984278205498
Acot13	3.85059268956741	3.27982066649484e-06
Acot3	-3.11394824027945	0.0012136857733511
Acot4	3.58465626362282	0.55788030643929
Acot7	0.696405210444636	0.44912839228066
Acot9	0.799895038266369	0.337172434894061
Acox1	0.611866496272556	0.411670110106821
Acox3	0.508606169890851	0.489743864072338
Acoxl	3.02514378149328	0.0588228573573272
Acp1	1.2433987716249	0.0846836611921835
Acp2	-0.106409565481567	0.938731641328918
Acp5	1.65181404563543	0.420608644540231
Acp6	0.495920959686185	0.847042149661309
Acpp	-0.550334272884652	0.24159019533755
Acrbp	Inf	1
Acsl1	-0.0878589982946583	0.869238033682967
Acsl3	-0.49085353511219	0.421755278796799
Acsl4	-0.725913975152958	0.328776144865031
Acsl5	Inf	0.0286976844155759
Acsm3	0.125043642041305	0.963104288244686
Actb	0.663551997394033	0.170336083903224
Actg1	3.01303093222629	8.91060144026701e-07
Actg2	4.63784878072518	0.000933935619570401
Actl6a	0.218630815453451	0.437818315556947
Actn1	0.564429986877982	0.394524428346055
Actn2	0.250356069636403	1
Actn3	3.11618732997994	0.0220115671272093
Actn4	1.57304806574647	0.0334521986054413
Actr10	-0.978469382363511	0.205771139779173
Actr1a	-0.117269851762874	0.852420215335596
Actr1b	-2.70360701115812	0.263709345722334
Actr2	-0.0696940184461595	0.865011099437149
Actr3	1.4988431290986	0.00497070221734924
Actr5	-Inf	0.176420235241687
Actr6	-1.86200122310834	0.264161039950316
Actr8	0.55775993957541	0.385076016391698
Acvr1	-3.50729416032649	0.000873142764560903
Acvr1b	-2.57689750212771	0.0926240402175413
Acvr2a	0.512950249070788	0.600625062525622
Acy3	2.93287588517778	0.0635155924520754
Acyp1	2.83999626304889	0.00617194894434783
Ada	0.95143918378362	0.100961101019291
Adal	2.95192096815385	0.255615601167845
Adam10	-1.2436420103318	0.0258512070991656
Adam12	-0.49983007970021	0.755333765040687
Adam17	-0.580695187357395	0.496136596005898
Adam19	-0.602026439063049	0.851508770931878
Adam22	-1.051039927318	0.392120625700393
Adam28	2.9705807684749	0.0212680685884243
Adam7	-1.37727480954446	0.597138922283596
Adam8	-4.53967145646466	4.33448707727436e-05
Adam9	-1.78468850786226	0.0109242542308826
Adamts13	-2.30509362608708	0.223679483428575
Adamts17	-0.971354046071233	0.4795148307972
Adamts2	-0.618391754778513	0.762137630172199
Adamts3	1.73364419062386	0.0601469391396522
Adamts4	-0.024879050343791	0.840260411645268
Adamts9	-2.74361422870562	0.029174796290305
Adamtsl1	0.763540643105733	0.0923156602767733
Adamtsl3	1.39531352901361	0.582866010115849
Adar	-0.732019842391903	0.508047232569158
Adarb1	0.301098013145385	0.711983306871661
Adarb2	-0.830539667605614	0.110827304977875
Adat1	-0.802757772332397	0.629923433525078
Adck1	1.26595652711784	0.366320662243563
Adcy1	0.25931167029076	0.729464849375806
Adcy3	0.0845566718869062	0.962231156007112
Adcy5	1.46107038555393	0.399921278385985
Adcy9	1.35049361620938	0.16178060906688
Adcyap1r1	-0.918365454335001	0.309890608886179
Add1	0.00786951220859381	0.886742164185928
Add2	1.65300904933984	0.124866194989789
Add3	-0.74873015261999	0.15363935183864
Adgb	1.29853452053998	0.503789153691673
Adh1	Inf	0.678778392308774
Adh5	-0.469847194713506	0.513691742593121
Adhfe1	0.185924481478056	0.551519074508667
Adi1	-0.884477976333982	0.672966070777355
Adipor1	2.71027220210618	0.000201138319906031
Adipor2	0.0278196940952193	0.832562910508965
Adk	0.610415822664344	0.369954128558637
Adm2	-2.78439225865524	0.26854678258406
Adnp	-0.778690131074901	0.574536875292448
Adnp2	-1.2598412443791	0.0626933689680578
Ado	-0.774031893847183	0.796601960146221
Adora2b	Inf	0.0174796867895953
Adpgk	-1.29946357347226	0.0127061771225139
Adprh	-0.212553322906787	0.835765646853794
Adprm	1.05317296145764	0.345909946492096
Adra2a	-0.822300491624384	0.631208628410545
Adrb3	3.41428908010396	0.107229683216376
Adrbk1	3.96400977111624	0.151503557034552
Adrm1	1.03959089753707	0.143321988581454
Adsl	-1.83407090222636	0.0144947521445826
Adss	1.00823902073512	0.0271127284045732
Adtrp	-0.393497259685371	0.289057659737334
Aebp2	-0.725862603548652	0.0891273373957701
Aen	-0.645688327732979	0.165024192412094
Aes	3.68133157541074	0.000117618374055746
Afap1	1.25582613438816	0.204590998149153
Afap1l2	-0.174879284247412	0.614311621284699
Aff1	0.981414945534345	0.0670283119124559
Aff3	-Inf	0.162200752721754
Aff4	0.314235796700824	0.65301896957745
Afg3l2	1.13890273927586	0.0583940250991934
Afmid	-1.04761987081128	0.347966023314774
Afp	Inf	0.0427149339300403
Aftph	2.41052278793728	3.4249217487253e-05
Agap1	2.23638063137918	0.00146838094299232
Agap3	1.70545275469375	0.0590101303756744
Agbl2	0.444856462293553	0.870830348823728
Agbl3	0.692870157077006	0.628667438289575
Agbl5	2.48874775231527	0.0449675166568319
Agfg1	1.29672985506069	0.0148570068623835
Agfg2	-2.22684405232955	0.024324841358436
Aggf1	-0.433019837602673	0.515760230168936
Agk	-0.123827056405836	0.934690911081647
Agl	-1.18003241604681	0.305440158714821
Ago1	0.837665232896168	0.435158972923369
Ago2	-0.353742686100144	0.84148517430515
Ago3	-0.295946818592956	0.352077056405702
Agpat1	0.932744351443986	0.232158951668691
Agpat2	-0.480004583599964	0.784541244882112
Agpat3	2.37497201329578	0.0470942615219044
Agpat5	-0.201187906124364	0.635931401587675
Agpat6	-0.615892166569726	0.227067568717541
Agpat9	-0.484580495071736	0.927443653618149
Agps	-0.850062269414043	0.0684979399521973
Agr3	-0.89159944409696	0.625366129048608
Agrn	-0.501242040017426	0.640824549376208
Agtpbp1	-0.473611602556313	0.387851993069649
Agtrap	1.29635359031368	0.233297016679229
Ahctf1	-0.567750196536101	0.235639774909174
Ahcy	-0.446690537903935	0.921762475365363
Ahcyl1	-1.29357709734207	0.0636786178820529
Ahcyl2	0.42204823821258	0.560228079068285
Ahnak	-1.15602657464236	0.137422199657107
Ahr	-1.143293631842	0.0723753207208626
Ahsa1	-0.0991165790147654	0.747843892848191
Ahsa2	0.177742965888448	0.531119466045824
Aida	-0.338177174399832	0.375044048156906
Aifm1	1.6106538242869	0.0181099451556905
Aig1	0.305178421895012	0.713951687240082
Aim1	0.703760801373412	0.181062599823708
Aimp1	-1.15249723853993	0.569092356010212
Aimp2	0.125882481061784	0.953546367639669
Aip	2.10903852177893	0.253179162528659
Aire	3.49308800565053	0.0429220215824319
Ajuba	0.573399878990137	0.652502782495722
Ak2	-1.15535351092085	0.21991705342447
Ak4	0.929459794754489	0.14437226487206
Ak5	0.0561362830368918	0.995453863268886
Ak6	1.74512967148538	0.0332033219052343
Ak7	3.87235181195269	0.00349735552232659
Ak8	-0.0119699127473999	1
Akap1	4.42555067424609	0.00148285513057681
Akap10	-1.693964235616	0.0146103414787981
Akap11	-0.757229819664002	0.0758629491156686
Akap12	1.77675934010199	0.00161622173380073
Akap13	-0.629135587806858	0.177727650567329
Akap17b	-0.77010007653439	0.187686475108636
Akap2	-0.199358370016427	0.628549688849021
Akap6	-0.637448099528138	0.714840887078595
Akap7	0.399607687088816	0.640485551547326
Akap8	0.397077426194356	0.32004036790683
Akap9	2.22203546788367	0.0279772222545836
Akip1	-0.950562366457734	0.0606893661605067
Akirin1	-0.65373772312968	0.652048641442694
Akirin2	0.530015287260754	0.161811095021458
Akna	-2.35543738254468	0.273075859026991
Aknad1	4.72807203980047	0.00432169380159435
Akr1a1	0.392488675844599	0.168321527898427
Akr1b8	-0.563878457924514	1
Akr1cl	1.60399108513075	0.0186265199569403
Akr7a5	0.588409252683794	0.77450723896513
Akt1	0.901587572135678	0.49238537900862
Akt1s1	Inf	0.635293159949681
Akt2	-0.00747716657012428	0.97505826944367
Akt3	-0.974864121795614	0.0887567191366907
Aktip	0.717542067697471	0.38214108726246
Alad	-0.814006505717197	0.938288271171936
Alas1	0.51551141028827	0.907261036881351
Alcam	Inf	0.227256754129714
Aldh18a1	-1.61319163382659	0.00193806139044287
Aldh1a1	1.01098753109459	0.714314805054983
Aldh1a2	-0.0510732109640736	0.573081602927839
Aldh2	0.879174927211701	0.0936694472067581
Aldh3a2	3.78281780553081	2.37110507653686e-06
Aldh4a1	0.242802773802432	0.64466533465063
Aldh5a1	-0.0752100269391836	0.943600390537063
Aldh6a1	3.2280122814917	0.000434862724588411
Aldh7a1	1.64264977158822	0.0351189836831332
Aldh9a1	1.00658816419012	0.0162355833077048
Aldoa	-0.830189133632617	0.927073367844102
Alg1	1.07684506025604	0.37578783185193
Alg10b	0.683538416047044	0.255375145080176
Alg11	-2.54037747323909	0.00996572765955742
Alg12	0.824885292387868	0.479075187152726
Alg13	-0.0987778157226972	0.843939937194854
Alg14	1.72901769581044	0.0978950405968629
Alg2	-0.499324759279852	0.444063017471203
Alg3	-1.8499135783861	0.238664947095837
Alg5	-Inf	0.118354627237404
Alg8	2.15478215742482	0.134768205583967
Alg9	-1.11427891120139	0.233255635672448
Alkbh1	-0.673243957248517	0.606716348065624
Alkbh2	1.72432086867444	0.153452388921035
Alkbh3	1.26623287721231	0.64811500061507
Alkbh4	2.25164802319047	0.313053050761352
Alkbh5	2.18594142243843	6.52173199810661e-05
Alkbh7	2.80370430591361	0.0350487303940116
Alms1	0.025598215065802	0.878865011832762
Alms1-ps2	0.14072454707107	0.980921435727795
Alox12	1.55926097673569	0.0907657802330941
Alox15	Inf	0.417426295092183
Alox8	-0.429668638076088	0.832094401229403
Aloxe3	0.13228288113276	1
Alpl	0.222757542024513	0.657917280636926
Alppl2	-2.70615861158672	0.0331099182422219
Als2	-0.982810938496964	0.209307128015006
Als2cr11	4.1018301660288	0.0547131309919918
Alx1	2.40497768853937	0.260166628616111
Alyref	6.0758291917275	9.28408126735463e-05
Alyref2	-0.148768692761111	0.967987675645964
Amacr	-0.754645444282183	0.393348528641682
Ambra1	-1.41728346221438	0.569770812633361
Amer1	-3.13627099132609	0.0623838540670488
Amfr	0.00306620381469777	1
Amhr2	-Inf	0.575809059488614
Ammecr1	2.08673556403418	0.204067511171863
Ammecr1l	0.486057629746976	0.297006868098328
Amn1	3.09726416383123	0.00158696245990409
Amot	1.58765072379589	0.0339736077535291
Amotl1	-1.2602001515042	0.692442416383612
Ampd1	Inf	0.31766121745518
Ampd3	-2.53752620526143	1.88839897699757e-06
Amy1	Inf	0.0481346195786455
Amz2	1.98440523628892	0.00779814478472675
Anapc1	-0.0304283602770344	0.829879679136765
Anapc10	-0.251593247800226	0.712989367453645
Anapc11	2.00145629347235	0.00396352615992491
Anapc13	0.591160938204188	0.447222077233884
Anapc15	1.69337925450433	0.00189594158733649
Anapc16	1.72862451538775	0.000716747873069674
Anapc2	-0.112723542228031	0.655703683127608
Anapc4	1.87747885634073	0.00912684621504198
Anapc5	0.192339584564378	0.588150356503677
Anapc7	-0.0195768670569957	0.787951127798561
Angel1	-0.861754598793093	0.117073604006933
Angel2	0.913712607656152	0.145021825799549
Angpt1	0.642623646745405	0.559936392537044
Angpt2	-0.55430190981214	0.839097241710604
Angptl2	0.155651538689929	0.810599217857933
Ank	-0.275645027914781	0.601030664148207
Ank1	0.947317146232005	0.549807846687275
Ankdd1b	-4.4803132370153	0.0278505372241589
Ankfy1	-0.551829818017537	0.383662703503482
Ankhd1	0.0195889915970179	0.82771416975794
Ankib1	0.667455729988713	0.397133864616965
Ankle2	-0.285242522621611	0.65066763051313
Ankmy2	3.13589949928361	0.024630959018855
Ankra2	-0.902425243106492	0.101062236070133
Ankrd10	-0.939894561199409	0.257699104913475
Ankrd12	-0.566612322470814	0.418019743613865
Ankrd13a	0.651143695343764	0.286089622353546
Ankrd13c	-0.64879840070274	0.156964219501543
Ankrd16	0.90423695813232	0.453253780139222
Ankrd17	-0.665871343480965	0.185904936791882
Ankrd22	-2.93496897997741	0.117845273108778
Ankrd26	1.19181101366976	0.487840330864479
Ankrd27	1.76633963426766	0.00932714120747146
Ankrd28	-1.15009581440794	0.0801731129565747
Ankrd32	-0.169278370810159	0.887687213068673
Ankrd33b	-2.84458846717106	0.0940206793890153
Ankrd37	2.6197384575768	0.00018351052814231
Ankrd39	2.95329013231577	0.221276409040373
Ankrd40	-1.92349243581312	0.00146467849037079
Ankrd42	-1.64806265945153	0.111194119794817
Ankrd44	-0.804645164356357	0.155474221568834
Ankrd46	-0.39922532191117	0.543032846452313
Ankrd49	-1.47343844088926	0.178334116648175
Ankrd50	-1.20503074859156	0.0571944565729161
Ankrd52	0.334976068116366	0.812373387681957
Ankrd54	Inf	1
Ankrd6	-1.10415210281635	0.0324684329022884
Ankrd66	-0.995153173918418	0.249605342466779
Anks1	-0.925177915581566	0.472003770798126
Anks1b	0.685133895688916	0.641141583260691
Anks3	-0.0986829284038212	0.902256914113232
Ankzf1	-1.14770452050194	0.355834772015624
Anln	-1.15976088109063	0.0460010618484985
Ano1	1.67137361745653	0.37429355305798
Ano10	2.51312242950661	0.0253086069746003
Ano2	1.54002086548258	0.228295026981979
Ano4	2.52617753764123	0.354499415907167
Ano6	-1.16919573679954	0.0735129553203308
Ano7	2.31774517351028	0.249074326474702
Ano8	0.392615083523071	0.943582229360235
Anp32a	-0.169142096643713	0.80473708167693
Anp32b	0.822078037919857	0.161143266402047
Anp32e	-0.559961360701184	0.129276206513036
Antxr1	0.555958382681974	0.537885485719083
Antxr2	0.945020652333993	0.0716615591046739
Anxa1	Inf	1
Anxa11	1.46104674721167	0.160309771763684
Anxa2	-0.316397030700545	0.902877211439188
Anxa3	4.20306234891993	0.0395791382195031
Anxa4	-0.407551274780527	0.793250094224999
Anxa5	1.26613168392671	0.263637601386716
Anxa6	0.92232137059726	0.28981606063743
Anxa7	-0.186713799231442	0.690766125299262
Anxa9	0.899193506183469	0.302579186102073
Aoc2	-1.15706062196301	0.475470710665858
Aox4	-4.43060043478686	0.00523837559740781
Ap1ar	-1.48312076483014	0.0127811606187938
Ap1b1	1.25929841935449	0.0466345976345135
Ap1g1	-0.158768755577987	0.646305204184396
Ap1m1	1.44985218220367	0.125146501815071
Ap1m2	1.08729520114192	0.0992332063203938
Ap1s1	0.981955628010487	0.248619924239488
Ap1s2	-1.83640740897339	0.0037091758183587
Ap1s3	0.992050754045839	0.427916966565222
Ap2a1	1.45717182937538	0.524809567784735
Ap2a2	-0.899303011151864	0.437702968076694
Ap2b1	0.878629058061531	0.0767855828603297
Ap2m1	0.242470552169984	0.306849277474635
Ap3b1	1.63982001555279	0.00824196879926199
Ap3b2	-1.40071276505238	0.165001789379527
Ap3d1	-1.62224004476721	0.212551299891683
Ap3m1	-0.940076634345737	0.0531364190451159
Ap3m2	-0.439900636275316	0.591499583854069
Ap3s1	0.531162886343879	0.260006268391139
Ap3s2	1.11642987857886	0.123495616976072
Ap4b1	0.175755368078464	0.844891266213567
Ap4e1	0.323194712504784	0.900117632954846
Ap4m1	1.21583598685911	0.264174923940165
Ap4s1	1.36601556743462	0.156690827049503
Ap5m1	-1.34406386123809	0.103372149165072
Ap5z1	-0.602630032955244	0.7642566765709
Apaf1	0.958670183788588	0.437662062717419
Apba1	1.23926152426288	0.188209253679766
Apba2	2.27403054831925	0.205733599390979
Apbb1	-1.4427843751595	0.0361752730187931
Apbb2	-0.013746863868462	1
Apc	-1.59355017149081	0.00916119420205388
Apeh	-0.322988737629392	0.894583157214382
Apex1	-1.35546636691899	0.517569875177665
Apex2	-2.52712993994592	0.0354406888172885
Aph1a	1.08779711295626	0.20018649878362
Aph1b	-1.8579302107459	0.24083738079626
Aph1c	-1.17816373325373	0.0758633616264016
Api5	0.0436110429026995	0.823664112865454
Apip	0.482182217259788	0.460923695282701
Apitd1	1.04576777029449	0.15427187248366
Aplf	1.21367816138607	0.0451918833413911
Aplp2	0.163990168684308	0.844298209976378
Apmap	-1.22931352712633	0.20459512763545
Apoa1bp	2.0216590325571	0.252216708957459
Apoc1	-Inf	0.206456624677155
Apoe	1.32172852518699	0.485232306106416
Apol6	0.708865056037294	0.641638413990842
Apol7b	Inf	1
Apoo	-0.965126178848729	0.342651798411721
Apopt1	-1.26177315442691	0.222310815441331
App	0.00999850607571206	1
Appbp2	3.56069834545502	2.24431805762773e-05
Appl1	-1.4651774446743	0.00602189753915218
Appl2	4.18407015802771	0.000661096334283997
Aprt	0.251160808943548	0.755359703355042
Aptx	2.84192049839296	0.00208392473943777
Aqp11	Inf	0.561797487839923
Aqp7	2.27175975317218	0.523571751454023
Aqp9	-1.86747444903117	0.000643496698466111
Aqr	-1.23561106754627	0.397163120982231
Araf	0.952455529681484	0.129265546340663
Arap1	1.24743048945263	0.530125337861533
Arap2	-0.420533470270828	0.513001847196227
Arap3	2.47803026839477	0.567032914800614
Arcn1	-0.958060133035655	0.119401962945081
Arel1	-0.636785306828923	0.176866176608812
Arf1	1.00869423893727	0.0673834130038028
Arf2	0.930216480489519	0.101774073693082
Arf3	0.844785043878694	0.156455223157096
Arf4	-0.925679033807534	0.140640536576186
Arf5	2.31396315237849	0.0156195127933644
Arf6	-0.324555607033759	0.704091321385145
Arfgap2	2.33243034746393	0.202343878160092
Arfgap3	1.54531935934225	0.0316987162309548
Arfgef1	-0.289147549104938	0.726467442984436
Arfgef2	-0.440101624345533	0.410081541670462
Arfip1	-1.1462052594612	0.0286159247148642
Arfip2	3.06319887136514	0.0052891369148865
Arfrp1	-1.36385175791921	0.280727432197684
Arg2	2.20709256607259	0.00449895378573879
Arglu1	1.13505337304885	0.172678125285732
Arhgap1	-0.84799696701521	0.0966966180424285
Arhgap10	2.08017157213878	0.0712086470846672
Arhgap11a	-2.06299435804518	0.000125627937248139
Arhgap12	-1.36461033074518	0.00785627921237445
Arhgap15	0.369111867113396	0.545411336892647
Arhgap17	-0.58559079406932	0.675305601852188
Arhgap18	-1.15140681332215	0.127037091133569
Arhgap19	-1.01208246288666	0.0722911523355073
Arhgap20	0.955915186252507	0.468285134766219
Arhgap20os	-0.593732617862256	0.316413628497434
Arhgap21	-1.25231271540745	0.00994992761235125
Arhgap24	Inf	0.037600892345497
Arhgap26	1.03829072165733	0.0545432205504559
Arhgap28	-0.954236506200022	0.0649091212976385
Arhgap29	-0.578683147967465	0.215641305066815
Arhgap32	0.729794901716282	0.698419699570331
Arhgap35	-0.141680567749956	0.602343580968216
Arhgap39	-1.59961028611824	0.0386210633915029
Arhgap42	-0.956981217387207	0.04336139219446
Arhgap44	1.85366673559049	0.0520217032646667
Arhgap5	3.37873865231353	0.125193319298844
Arhgap8	-0.940172371162826	1
Arhgdia	1.14788125692317	0.185902751536138
Arhgdig	-Inf	0.1495150660006
Arhgef1	-1.62835139709358	0.185450479591287
Arhgef10	1.42129542139436	0.168011884151099
Arhgef11	-Inf	0.130606866179411
Arhgef12	1.32386673592923	0.00220363789624478
Arhgef16	0.580312219267945	0.520301495064729
Arhgef18	1.01010487867184	0.2639109185024
Arhgef2	-2.1964422234625	0.572952138111711
Arhgef26	-1.1424960623327	0.556027471214989
Arhgef3	0.219981259951691	0.803688308426742
Arhgef39	0.0903421006144743	0.936938693519917
Arhgef6	2.43851047827074	0.140706616641433
Arhgef7	0.947232241074194	0.0994458799920542
Arid1a	-1.10325966251838	0.0862158353414572
Arid1b	1.65103651900396	0.00638270050546681
Arid2	-1.10319147194485	0.0182528999952872
Arid3a	-1.64547289930868	0.126312782016521
Arid3b	-2.19865690002412	0.0338401701821506
Arid3c	2.62302379017627	0.0785414692465466
Arid4a	0.570345106116763	0.642507316708044
Arid4b	1.22396895882433	0.0687957307397346
Arid5b	1.26578705253575	0.195552076214359
Arih1	0.0181531161293722	0.74700826356019
Arih2	-1.04845723366202	0.544406773844252
Arl1	-0.789671138389237	0.614180150260067
Arl13b	-1.27254243474999	0.123057513809676
Arl14ep	-1.24285232962796	0.044742082949443
Arl14epl	1.31311851994245	0.26328097459109
Arl15	0.887029765848502	0.187880822775924
Arl16	Inf	0.0137250102613892
Arl2	5.13704483645314	0.0432861581255944
Arl2bp	1.56551282544884	0.0278041371946666
Arl3	0.520350084046226	0.865069980140799
Arl4a	-2.34830062194659	0.00152629590686561
Arl4d	1.98795935159924	0.14143307089552
Arl5a	-0.261846930714025	0.789716115249177
Arl5b	-0.0743591775046573	0.944658349344682
Arl5c	-0.846343860946878	0.666054626779682
Arl6	-0.199491919342979	0.828360161435168
Arl6ip1	0.418444570887851	0.296269019912362
Arl6ip4	-0.503955736206568	1
Arl6ip6	-0.20740444953035	0.607181157044426
Arl8a	2.35110974484964	0.000249845896460437
Arl8b	-0.993881200464753	0.134298055401727
Armc1	0.320056424437187	0.407273092949505
Armc10	-0.418542106115243	0.415310812777531
Armc12	Inf	1
Armc2	-1.60080715531604	0.132993456928411
Armc4	1.12989182285617	0.474462519453186
Armc6	-Inf	0.36086524790738
Armc7	-2.09108096845542	0.0839354965999954
Armc8	-0.0551498591158905	0.837153199839281
Armcx4	1.4847028574707	0.396464138448592
Armcx5	-2.09624434992698	0.000309135503483573
Arnt	1.19271761231363	0.156522727675563
Arntl	-1.06422074137881	0.0383517710383456
Arntl2	0.187755853432676	0.891331345473925
Arpc1a	4.16670264105306	3.84314573230006e-08
Arpc1b	0.396936382945417	0.967969334072879
Arpc2	0.845860115629057	0.0727552984585285
Arpc3	1.87110069808146	0.0576578214393995
Arpc4	2.79228423023213	0.139851548355372
Arpc5	1.36293686610201	0.0336341203083875
Arpc5l	0.376864171012957	0.501179215585595
Arpp19	0.0467690310413009	0.949185062196124
Arrb2	0.949006749800464	0.173187933089234
Arrdc1	0.715055846073279	0.277509011838328
Arrdc2	-1.75759541338854	0.000971615337141185
Arrdc3	3.15138475831082	0.00343090239674239
Arrdc4	-3.59497663107382	0.0400106430169425
Arsb	1.20117421789206	0.0232421610874708
Arsg	1.10519699080811	0.442324079914613
Arsk	-0.395936571286958	0.793600777359039
Arv1	-0.306768469873175	0.757439902547037
Arvcf	-0.3223827687821	1
Arx	Inf	0.0518038515774329
Arxes1	-1.04543491717746	0.398116728650059
Arxes2	-1.7151751897949	0.058488445296603
As3mt	6.79196268431537	7.96352643885287e-06
Asah1	-2.23289983940392	0.149679067642772
Asah2	0.200152734948761	1
Asap1	-0.717302272071425	0.142207778463227
Asap2	-0.434044652913386	0.37747288973237
Asb1	2.99767969340493	0.289994202385908
Asb13	1.46468251023675	0.172120279258341
Asb15	1.47014023185479	0.0432324950947738
Asb3	-0.263483263944808	0.525693881490529
Asb4	-0.669992638107729	0.317404378732379
Asb8	3.00891001917527	7.97097535457629e-05
Ascc1	0.631370740780507	0.466869697207712
Ascc2	1.22976495513986	0.423757299089091
Ascc3	0.438049534496266	0.291181962235709
Ascl2	-Inf	0.397910947748596
Asf1a	-0.684805630579971	0.188261302718216
Asf1b	-0.168105005509891	0.618929530077382
Asgr2	5.8630725370853	0.00120729300190076
Ash1l	2.92065937620728	0.0382233509934884
Ash2l	-0.423654435875917	0.503859930822741
Asna1	1.95005466990938	0.0273314276219388
Asnsd1	2.72007217317273	2.24923836709244e-05
Aspg	2.545558614123	0.34152906134245
Asph	0.807437762507702	0.245679645232646
Aspm	3.00428558517803	0.0371982538304891
Aspn	Inf	0.345476686899305
Aspscr1	-0.131039925504459	0.876415894907566
Aste1	Inf	0.0553637647254683
Astl	0.377124347591404	0.525219018829546
Astn1	1.56154823675563	0.36275469180269
Asun	-1.4186520374247	0.0197138229540786
Asxl1	-1.07546411990461	0.103060864652213
Asxl2	-1.4212381827556	0.0337299519483415
Asxl3	1.18472792273688	1
Asz1	1.13973595186428	0.026910348970093
Atad1	-0.00596817122658529	0.991329609414338
Atad2	-0.331233095954554	0.854477006724122
Atad2b	-1.02126013824636	0.218676664227932
Atad3a	-1.20544684783746	0.0386472296168791
Atad5	-0.548620208337979	0.405665661378174
Atat1	0.828534686553381	0.451049582974078
Ate1	-0.438858434593373	0.336949764046527
Atf1	-0.254292518568093	0.667246503171864
Atf2	-0.786802839219686	0.110728146908769
Atf4	2.12130556592965	1.65720514727705e-05
Atf6	0.291088436744481	0.680033532224321
Atf6b	-0.079771397168899	0.837591082560819
Atf7ip	1.43085290442037	0.0263398255804904
Atf7ip2	2.7074261029799	0.0214761046286526
Atg10	3.20995764237801	5.57476134021573e-05
Atg101	0.283564975844278	0.623905262384315
Atg12	1.90009974879157	0.000345487709736237
Atg13	1.44126973736697	0.267110790260484
Atg14	0.556227222140806	0.334790360147725
Atg16l1	-0.170661485179995	0.616579438158007
Atg2a	1.10634857768085	0.295620528756639
Atg2b	-0.90534809115686	0.0762635668887428
Atg3	-0.0880196345773314	0.899880313156235
Atg4a	-0.544859153064867	0.458033277365108
Atg4b	0.748875567331653	0.161084553781935
Atg5	2.55348304451098	4.69042111025069e-06
Atg7	1.12090481157349	0.300248915606388
Atg9a	-1.83695565839048	0.150525820140573
Atic	1.63128033913325	0.20215034431884
Atl1	-0.274395300029467	0.686910736203646
Atl2	-1.44255062076714	0.00401247212557983
Atl3	-0.702634406451598	0.204863042736163
Atm	0.229212072544631	0.903888200509269
Atmin	0.0808213602756604	0.399203277258775
Atn1	0.257105928355107	0.653515778365528
Atox1	1.50990935319318	0.0227899101890528
Atp10a	-0.417232341002739	1
Atp10b	0.546182322090675	0.581143690887544
Atp10d	3.1367975084097	0.0255537895685256
Atp11a	-0.865774744053692	0.13870276629961
Atp11b	-0.225067661478757	0.834308611970522
Atp11c	-0.422087865241955	0.502293228894808
Atp13a1	0.678526395203806	0.477874243145757
Atp13a2	0.216765738015353	0.714893083569706
Atp13a3	-1.07552071060455	0.0354572705173909
Atp1a1	0.365360635021592	0.624981115900314
Atp1b1	1.22044810986524	0.0523552392128967
Atp1b3	-0.790193173794929	0.139210315666324
Atp2a2	-0.176670486982518	0.748565230434228
Atp2b1	-2.02285734948934	0.000370582010748119
Atp2b4	-0.837023274328641	0.123840611757576
Atp2c1	0.206162187700256	0.655359345502367
Atp5a1	-0.463846363132377	0.867816573484442
Atp5b	0.193904041157083	0.832381162876483
Atp5c1	0.530334598957892	0.281095575497351
Atp5d	-1.1482267520944	0.422402522552696
Atp5e	3.18606961497066	0.000871898958425052
Atp5f1	0.592040421210639	0.0640192022806776
Atp5g1	-1.57438268442432	0.225076816348165
Atp5g2	0.416288646896124	0.625433923214042
Atp5g3	0.911358320497907	0.0510962494041678
Atp5h	0.836088610681362	0.101865263569932
Atp5j	1.97840988121948	0.0113021608272492
Atp5j2	-0.893494989103312	0.544627909290796
Atp5k	-0.359468500949324	0.982817633036778
Atp5l	2.8259511256731	0.0215220671964877
Atp5o	-2.20776517810091	0.1746157385397
Atp5s	0.372603384271802	0.618325245060964
Atp5sl	0.890470852324295	0.291510605596397
Atp6ap1	1.0532655939251	0.174571660413738
Atp6ap2	-0.456219264437907	0.990944521761729
Atp6v0a1	1.14104294484746	0.24445865772906
Atp6v0a2	-1.52506092720842	0.00465683721398159
Atp6v0a4	2.08096760736041	0.0256962201918297
Atp6v0b	1.79818322724533	0.00283581350033123
Atp6v0d1	0.903890358856911	0.0657602681816291
Atp6v0e	1.09954689981039	0.0949569483366077
Atp6v0e2	2.52706686343658	0.00535614188555236
Atp6v1a	1.91160040167966	0.000670349274548064
Atp6v1b2	-0.148503276489333	0.773241086351113
Atp6v1c1	1.34071150659154	0.0377399173250421
Atp6v1c2	0.375970793445701	0.921521469419394
Atp6v1d	2.47723305412778	0.000230578656761756
Atp6v1e1	1.04257895391752	0.0186880985373982
Atp6v1f	3.00536046618441	6.22708350506326e-05
Atp6v1g1	2.27169283880167	0.000123172569784609
Atp6v1h	-0.29359155113322	0.50840592380734
Atp7a	1.01215989409053	0.0732963464054367
Atp8a1	0.500078663223356	0.413442134562289
Atp8a2	3.87903100399069	0.0148830972880379
Atp8b1	-Inf	0.094774654218776
Atp9a	0.618914964416397	0.435160204487667
Atp9b	0.274401553789658	0.510365504676782
Atpaf1	-1.24284220434794	0.0990905789850919
Atpaf2	-0.836645374963413	0.382482235358966
Atpif1	0.868957843377479	0.287987547207377
Atr	1.5734450212978	0.0591007034295553
Atraid	-1.42478797379483	0.435994105013119
Atrip	NA	NA
Atrn	-0.335396467109632	0.511697664727272
Atrnl1	-1.48404480223275	0.0923173514482247
Atrx	-0.370758231170479	0.290933208010689
Atxn1	-0.981102394866147	0.0486733045538502
Atxn10	1.99187177024041	0.151145013015596
Atxn1l	-1.83893732451206	0.000422891966963228
Atxn2	-0.176672971118468	0.851331511082601
Atxn2l	0.704891976705409	0.587647857875773
Atxn3	0.68688208568434	0.674926138472319
Atxn7	-0.617020661783916	0.18242973756057
Atxn7l1	0.877472058393943	0.211203314305419
Atxn7l3	NA	NA
Atxn7l3b	-1.88304134412875	0.0174968464840983
Auh	0.793689893337473	0.154688356403556
Aurka	0.17664221611741	0.732441519697101
Aurkaip1	-0.624381819632388	0.906858788293255
Aurkb	2.99580935424079	8.73649751679961e-06
Aurkc	-0.910547746310633	0.0546479151470957
Auts2	0.432639172970305	0.560534751902531
Aven	1.84808380390175	0.196612192443999
Avl9	-1.30503195412961	0.0136835972441149
Avpi1	2.25074447748379	0.00776756405901706
Awat2	Inf	0.0026303134919317
Axin1	0.617465516462437	0.298294627925391
Axin2	0.897953849381779	0.203281667322255
Azi2	-0.81925023627276	0.354134829045083
Azin1	-1.44272278539995	0.00499786846005591
B020004C17Rik	-2.95384778841781	0.378810716061889
B020004J07Rik	-2.39449397104921	0.0411690613466101
B020031M17Rik	2.1226779623239	0.47590265746432
B230118H07Rik	3.23183709868005	0.0884015697364402
B230208H11Rik	-0.924996092796914	0.438740542021529
B230219D22Rik	-0.477543116812425	0.462026612970544
B2m	2.32960362127794	0.000110973639935627
B3galnt1	1.32447728726728	0.0536770121742247
B3galnt2	-0.405196548404287	0.289202091816972
B3galt6	NA	NA
B3gat2	1.5964298189485	0.123958752937905
B3gat3	2.64188881738974	0.262279352435012
B3glct	3.23586124811351	0.140404226020662
B3gnt1	-0.637340228681398	0.824780571407984
B3gnt2	-2.10887711136297	0.000414722977481486
B3gnt4	-0.736401818534318	0.212443046715747
B3gnt7	0.274737087532653	1
B3gnt9	-0.980295330811048	0.568485629248757
B3gntl1	1.1734095943924	0.0832014635191662
B4galnt2	0.314118479180069	0.551099652333694
B4galt1	-2.53206638121322	0.122039517531233
B4galt2	1.27506840072505	0.0824035401544615
B4galt3	-0.602773401448921	0.513759533058917
B4galt4	-0.108533207563858	0.930854287650495
B4galt5	-0.257769816886384	0.552406294894176
B4galt6	-1.15244823515072	0.00958210781767441
B630005N14Rik	-0.162159694190957	0.743949576915286
B930041F14Rik	0.287190666761678	0.944579760258712
B9d1	-0.307762055953501	0.3767103400013
B9d2	0.927326886803278	0.729367667765285
BB031773	2.95922785915091	0.000103814522890412
BB287469	NA	NA
BB557941	0.901318864815026	0.153154330574663
BC002163	2.3358501100958	0.0723041676614327
BC003331	0.425004886611445	0.551567789938849
BC003965	-Inf	0.0335557826336892
BC004004	-0.598827931634313	0.970337338210763
BC005537	0.022292254584893	0.885602637599626
BC005624	0.0724040804727094	0.830686864810347
BC017158	-0.381101043309373	1
BC017643	-0.650419825936966	1
BC021767	1.03566577359305	0.0725765517413986
BC021785	1.22861300165624	0.687008657909256
BC021891	-6.07831888854162	0.00643193557176564
BC022687	-2.25349108653052	0.345614118932251
BC023829	-1.06193435801411	0.148098276355208
BC024386	-0.804782801840232	0.544426435206247
BC024978	0.743996624983055	0.760793603581443
BC025920	-0.849974958494679	1
BC027231	-3.56782899740325	0.0304460620227035
BC029722	2.48031552899398	0.0144908611114923
BC030307	1.36256102341788	0.250737404723798
BC030336	-0.686744024653022	0.31075759415884
BC030867	-0.428230719987247	0.700742498852236
BC031181	1.22316662748791	0.0265828416653299
BC031361	NA	NA
BC033916	-1.59608756080779	0.0283600737724005
BC037034	1.81163795588935	0.0904422197517046
BC037704	NA	NA
BC039771	2.03519696894839	0.274274839509825
BC048403	-0.0631039357467311	0.78927591129409
BC048502	0.516206133854729	0.773970059011805
BC048546	4.38450746273275	0.0273748049381091
BC049762	NA	NA
BC051019	1.05132314773725	0.196174626783537
BC051537	-2.83833388249612	0.0360087883965386
BC052040	1.17480257348096	0.160980309750518
BC052688	-0.67468185960857	0.953131622665851
BC055324	0.482084521002541	0.405262456810402
BC068157	2.95325969677525	0.269615345916927
BC080695	NA	NA
BC147527	-1.12185830360426	0.471933637779724
Babam1	2.99085149378418	0.0762286243790793
Bace1	-1.24005777542908	0.280552457490608
Bach1	-0.637901363559597	0.902184517601599
Bach2	2.00434655214	0.256439763865242
Bag1	0.105953050060623	0.28823356138564
Bag3	-Inf	0.00492622940016564
Bag4	0.559207808570012	0.120784458198658
Bag5	-3.6561077012222	1.73347073852782e-05
Bag6	0.77074139107435	0.30259485416085
Bahcc1	-0.694869535806574	0.563068743098245
Bahd1	-1.13110393950247	0.0259429540985702
Bai3	-0.856236731286721	0.343536874385566
Baiap2	-0.0783628749559797	0.897346832452052
Baiap2l1	1.00502973192459	0.101935634307792
Baiap2l2	2.17127731510849	0.00374583611458211
Bambi	-Inf	0.171137769275287
Bambi-ps1	Inf	0.486758082229441
Banf1	1.47459699760537	0.00599542434378442
Bank1	1.58154931384932	0.136532874099397
Banp	1.18406089643037	0.223328408134339
Bap1	-0.146318649684901	0.881896929189102
Bard1	1.05254823930889	0.154526764065705
Basp1	3.47038524132194	0.00971545824447638
Bax	-Inf	0.0968949997884685
Baz1a	0.297745062659947	0.775187197237344
Baz1b	-0.0449516775667619	0.817682565374351
Baz2a	-0.325295255228839	0.939353287983482
Baz2b	-0.559022655729725	0.33158033719363
Bbip1	0.137185282161004	0.872734266919484
Bbs1	0.90696591177596	0.532649618436913
Bbs10	2.06004675292729	0.464069557228882
Bbs2	1.17534417761619	0.0988570547322409
Bbs4	1.69021732635974	0.0114989401221473
Bbs5	-1.31980886745526	0.0517062515000785
Bbs7	-1.56326037731504	0.215920186383175
Bbs9	0.0215467040856342	0.991307554893977
Bbx	-0.465219138853364	0.757781790400147
Bcap29	4.58299460731473	3.93926075168212e-05
Bcap31	-1.32179493210031	0.0620332811688539
Bcar1	1.65622756404363	0.184342030210332
Bcar3	1.77583226118083	0.000397319044488975
Bcas1	1.18217505138767	0.0634357855452
Bcas2	0.299568986843552	0.748545058852317
Bcas3	1.088610121686	0.0757848680499591
Bcat1	1.0470139713953	0.0304109338914492
Bcat2	0.679125257480481	0.513132473503444
Bccip	0.157222220309118	0.987129501243225
Bche	0.481575606219089	0.977724336858631
Bckdhb	-1.0828859172831	0.291516761979789
Bckdk	2.09566100292025	0.0595545266316407
Bcl10	-0.370819610966383	0.629576105656019
Bcl2a1b	NA	NA
Bcl2l1	0.232256913873648	0.821496726357404
Bcl2l10	0.321342222047338	0.870286989964094
Bcl2l11	-2.29907994431506	8.21741177979267e-05
Bcl2l13	-0.665301842079499	0.173219462555932
Bcl2l14	-Inf	0.296098211089223
Bcl2l15	1.44897875890416	0.338529943563223
Bcl2l2	0.549818100649916	0.800421692180794
Bcl6	1.72625018723674	0.252837650663131
Bcl7a	2.97023577455027	0.222709009503871
Bcl7b	0.146156284222381	0.718000671805486
Bcl7c	0.046062619442666	0.727246083891441
Bcl9	0.228172768024491	0.895573588496499
Bclaf1	0.35367054957802	0.304042355750992
Bcor	-4.2253039914701	0.00186805202648417
Bcorl1	0.548395720168446	0.46344576404653
Bcr	0.729909110875142	0.534847672140054
Bcs1l	1.82610869716901	0.405701533818599
Bdh1	0.129449663928424	0.811569270749825
Bdp1	0.389644529966097	0.459015227138941
Becn1	-0.845061165686508	0.128651439836812
Becn2	-4.6083247300311	0.0295699737204036
Bend3	-2.72062354193511	0.00651699902333446
Bend5	0.334974527203333	0.779595786076133
Bend6	1.16546531401551	0.644353448682603
Best2	3.31598326567469	0.168042628511739
Bet1	1.10486283112871	0.0423879778472381
Bet1l	-0.20195324463812	0.972839235514569
Bex1	Inf	0.436271551420606
Bex6	-4.20127688372355	0.0348050751918741
Bfar	0.971580840129828	0.128784504399321
Bfsp1	NA	NA
Bgn	3.8458145030323	0.0185836373686878
Bhlhb9	1.26240587329836	1
Bhlhe40	-0.671242624455844	0.906792269654365
Bhlhe41	-1.39958827421543	0.0345433286283978
Bhmt	-3.52408336273837	0.0177955695271749
Bhmt2	Inf	0.644914922040251
Bicc1	0.535394931794098	0.827559819221185
Bicd2	0.121134009914683	0.999041460745642
Bid	-4.27499947812729	0.000381002028659461
Bik	0.729041891036077	0.413550905136648
Bin2	1.76858855172704	0.00525206306205704
Bin3	-2.32120276022354	6.18449559598002e-05
Birc2	-0.348558906859977	0.477677108097123
Birc3	-0.150119362413719	0.556167914171196
Birc5	0.914278376447064	0.0141575991848106
Birc6	-0.269336510289405	0.653523923630934
Bivm	0.809033885021363	0.309778100940559
Blcap	0.38274267762006	0.561834913289857
Blm	-1.28730398878769	0.0198701940953442
Blmh	0.275676391653137	0.644141777133414
Bloc1s1	-0.0875344064077501	0.718889328615273
Bloc1s2	-0.231473098351952	0.863556042137999
Bloc1s3	-0.479132419227783	0.593757278655729
Bloc1s4	-0.691310523550871	0.402773623746824
Bloc1s5	3.24476953052344	0.182093021315823
Bloc1s6	0.275445995198698	0.93914596610198
Blzf1	1.34816942468873	0.043907631521413
Bmf	-Inf	0.0381198556957031
Bmi1	-1.92517923679203	0.000244855568720586
Bmp15	0.863073971240263	0.122426229830384
Bmp2k	0.45728060766137	0.868745791547973
Bmp5	0.23258681147551	0.648046914755914
Bmp6	-Inf	2.98281390188594e-05
Bmp7	-Inf	0.0483428196125758
Bmpr1a	-1.21168535613303	0.0428203963464496
Bmpr1b	-1.08671750695525	0.0405040639640728
Bmpr2	-0.732226704768971	0.169591474215492
Bms1	1.83652027213014	0.14231227939876
Bmx	0.821349988637749	0.369191953659242
Bnc1	-0.864483080740808	0.167417569331089
Bnc2	0.271597493500368	0.753931339446396
Bnip1	-0.955949628942214	0.944533223556968
Bnip2	-1.49485798102467	0.0920363079224868
Bnip3	-0.905860786095033	0.0506522571805042
Bnip3l	2.55344864879904	1.3600775209809e-06
Bod1	0.696980297217675	0.397185794334293
Bod1l	0.0721832413492029	0.643419462717721
Bok	-0.577504565178878	0.941752796136451
Bola1	Inf	0.636628885496769
Bola2	1.46805871737897	0.471171391421223
Bola3	1.15745556137815	0.104491317884438
Bop1	-0.998829016770191	0.457754811443239
Bora	-0.739003772011078	0.125880332786755
Bpgm	0.877087349273281	0.191997578891644
Bphl	0.213883276499835	0.981109465229442
Bpifc	-2.3001115583345	0.052024780077872
Bpnt1	1.92228502041962	0.0465312624316975
Bptf	-0.400437854834799	0.360978896519483
Braf	-0.627916220869882	0.487736111070053
Brap	0.499756522752736	0.555972027338697
Brat1	-1.2548306506943	1
Brca1	-0.151291340869129	0.893024359957883
Brca2	-0.0746962809709543	0.67058147042237
Brcc3	1.27457091833809	0.107413833426588
Brd1	-1.20075604027441	0.0140100637175415
Brd2	-0.236050235172809	0.652504404068692
Brd3	0.417067644794359	0.634099926146593
Brd4	2.39177308207882	0.000718297125415246
Brd7	-0.650371618230234	0.139571350769181
Brd8	-1.84059035010831	0.00118020828746333
Brd9	0.148841194550504	0.572900379076066
Brdt	-0.953566716233432	0.0518762836839798
Bre	0.0307532213229866	0.978746029014035
Brf1	1.08782432392714	0.126885733191854
Brf2	0.937247360813377	0.157523583876325
Bri3	-0.324082625061435	0.397825760605699
Bri3bp	-1.41137359591971	0.300927012197332
Brinp3	2.6350714530956	0.00916033787028992
Brip1	-0.585668589825897	0.494035281260908
Brix1	0.172478634050638	0.757202073913835
Brk1	0.759827585482501	0.176046644562482
Brms1	-1.06220074522128	0.628106533383035
Brms1l	-1.61738430638724	0.00884141691463293
Brox	-2.06849466779736	0.000264086393716248
Brpf1	1.79688426742498	0.0583299406434209
Brpf3	-0.0839194246359222	0.828651561514792
Brsk2	-0.9617498951572	0.0662190263441997
Brwd1	0.103234501360569	0.808908510794722
Brwd3	-0.836510897148124	0.228170740436363
Bscl2	-0.428276275103499	0.62164164344824
Bsdc1	2.56261605127217	0.000991590801133926
Bsg	1.67934424439616	0.00544665176335595
Bsn	-1.04714107399423	0.641069692794885
Bspry	0.646348539712124	0.494920374650146
Bst2	1.36516709038294	0.145592864683163
Btaf1	-1.10917411389331	0.0135491784744602
Btbd1	-1.42526907030985	0.150838204586467
Btbd10	0.33072591830634	0.691343257215886
Btbd16	-0.0764951299475424	0.911491316460681
Btbd18	-3.33405946616102	0.0398429185142342
Btbd19	3.6743250892808	0.0109116979738869
Btbd2	-0.0297334386385513	0.839041786101862
Btbd7	-1.20850724303187	0.281606631169269
Btbd9	0.845783123296102	0.470577826816853
Btf3	-1.19939334279173	0.0604684485595117
Btf3l4	0.407267442512418	0.299778787367165
Btg1	-1.24239678855144	0.0351905831222625
Btg2	-0.179535865050582	0.93621621392159
Btg4	0.243292395565991	0.56554258165843
Btk	0.408583767018414	0.70195227576353
Btla	Inf	2.76210879103081e-05
Btn1a1	6.27212414454538	0.000966726698801902
Btrc	-0.216416374038334	1
Bub1	4.18504259160428	5.02809511893283e-06
Bub1b	0.125623721572496	0.910507036824371
Bub3	1.18290770509073	0.0429225978194585
Bud13	Inf	0.1609888442399
Bud31	-1.18827316992047	0.458078613917395
Bysl	-0.836383334196121	0.266219683766629
Bzw1	1.06497795156086	0.0353076679684421
Bzw2	0.613804207045288	0.722784495150382
C030006K11Rik	0.853979234223394	0.625614023970521
C030013G03Rik	Inf	0.030856456268812
C030034I22Rik	-2.60398815563495	0.301429019492334
C030039L03Rik	1.50290437309384	0.393482480166563
C130026I21Rik	-0.493987571613827	1
C130036L24Rik	1.37698112261301	1
C130046K22Rik	3.38979770412413	0.0506878359428858
C130060K24Rik	4.16118988390433	0.000255140130544718
C130074G19Rik	-Inf	0.00110016355899617
C1d	2.40929527045096	0.0142049642678639
C1galt1	-0.365017667173439	0.666896232482442
C1galt1c1	-1.42757413228248	0.210988632454844
C1qb	0.300802419764383	0.78647778946847
C1qbp	0.728494753809219	0.204640458052296
C1ql1	0.827635244199503	1
C1ql3	-0.846524177915029	0.334207074304166
C230052I12Rik	0.103314020632028	0.920494849358659
C230091D08Rik	-0.308187634136413	1
C2cd2	1.79446933157281	0.0945128258735172
C2cd2l	-Inf	0.0115644724159068
C2cd3	-0.935852772731606	0.0932553140868947
C2cd5	-0.494315009309421	0.550612949482772
C330006A16Rik	-0.693053890769778	0.369329286683284
C330007P06Rik	1.05063403647415	0.217937376049633
C330013E15Rik	4.94294967171694	0.044349906854148
C330018D20Rik	-0.154790209444879	0.772261291539401
C330021F23Rik	-1.63307712993272	0.323662800278148
C330027C09Rik	1.01519740591284	0.044647778195259
C430002N11Rik	1.85495118884064	0.172098860520546
C4a	-Inf	0.958103020898484
C530044C16Rik	0.335411630413732	0.859820528568162
C5ar2	2.13636450731833	0.240034715355337
C77080	-Inf	0.260242161552676
C77370	0.613481618830738	0.59500783436478
C78339	1.4211828581741	0.369056145714919
C86187	-0.451097613301411	0.280039068923102
C86695	-0.921123704396563	0.085915845682981
C87198	2.15978185033462	0.0715699161872524
C87414	0.308397596800557	0.653009216798963
C87436	0.635390493425924	0.212158216106844
C87499	-0.891712040345165	0.0661801466468275
C87977	-1.91727525878154	0.0192129232053179
C8b	1.56844574906331	0.0555898816725438
C8g	3.12083820342783	0.071486321052695
C920006O11Rik	0.940017599638488	0.636785980551103
Caap1	-2.93390558067291	0.434649232513058
Cab39	1.69117080134386	0.00578453319928089
Cab39l	-1.16449432732746	0.260532327386243
Cabin1	0.706187473360691	0.424668306287619
Cables1	-Inf	0.421923076147551
Cables2	-0.369100093825575	0.321672465495307
Cabs1	1.5750869531181	0.261064252958987
Cabyr	-1.30237336621785	0.9432258164923
Cacfd1	-0.523776477224424	0.538585609204912
Cachd1	0.034880401700036	1
Cacna1d	1.02382744961879	0.182577575534522
Cacna1h	-0.85268853552219	0.425770262040048
Cacna1i	0.547260594700773	0.895509185249379
Cacna2d3	-1.41381362726564	0.129472852408722
Cacnb2	-0.166301921197218	0.850747393500173
Cacnb3	0.900704213859083	0.341308417959588
Cacnb4	2.3669364659808	0.126331931157365
Cactin	-1.32283017505963	0.343374630775072
Cacul1	-0.162625738508543	0.759907930617423
Cacybp	0.93015605694954	0.0773411119206707
Cad	-0.934283819166643	0.391839064509975
Cadm1	-2.8194982374107	0.000526425671663577
Cadps2	-0.617272257306502	0.494917471116634
Cage1	1.37718970261792	0.398794798026243
Calb1	0.49679214324351	0.517567135422752
Calcoco1	2.80745719826207	0.0132068967165835
Calcoco2	-4.23196828091512	0.000326411785922905
Cald1	Inf	1
Calm1	1.73962514944403	0.000981468200515509
Calm2	4.85491534803447	3.9036169555009e-09
Calm3	4.39892925792371	7.05377925713113e-05
Caln1	0.50299204404783	0.719140562090201
Calr	2.79798756715968	9.61023848585414e-07
Calr3	1.64629204659595	0.0593136959567122
Calr4	2.31975100995193	0.00150573313766773
Calu	0.116295718791119	0.553239334398145
Camk1d	-0.439448127282696	0.417835994881834
Camk1g	4.32019089086809	0.00102819455076902
Camk2d	Inf	0.0426338864086989
Camk2g	2.59897538996648	5.77017860777596e-06
Camk4	1.06631367441131	0.425456064480706
Camkk2	Inf	0.0831121794119789
Camkmt	2.00602678700149	0.00704440612569813
Caml	0.478532576837813	0.528730874362187
Camsap1	0.299542403139438	0.747253005107675
Camsap2	0.168618707118452	0.833080152098506
Camsap3	1.66212846979861	0.130748101568938
Camta1	-0.375612979039339	0.339384623244093
Cand1	-0.123424390261581	0.945689863205169
Cand2	1.56527674892201	0.0814395246355522
Cant1	-2.17419904638932	0.00260176455542925
Canx	0.272166566383382	0.589078011461376
Cap1	0.969717068481251	0.692326366500201
Capg	4.01659310527257	0.480722611887487
Capn1	2.43216155645446	0.117239718276934
Capn10	-0.862399104789416	0.396160619921262
Capn12	1.37045941038512	0.180447260683615
Capn3	0.64479012955833	0.838116069274908
Capn5	2.92436453293202	0.089423426173998
Capn7	-1.07422202724755	0.0187126644306281
Capns1	3.44980224384737	0.000108578433329604
Caprin1	1.40063483740237	0.0142870528779744
Caprin2	1.45366531425213	0.00599394292307922
Capza1	0.307685392331134	0.389187157708193
Capza2	1.14171876135447	0.123619940401437
Capzb	1.9895915131191	0.0071303647572383
Car1	-1.93743604540738	0.186748334277153
Car10	2.49106058589934	0.00981866014119813
Car2	-0.254830650694295	1
Car5b	0.4583029723229	0.923769397076755
Car8	0.558325850885411	0.274122031814508
Car9	1.67007602259528	0.0238584806118951
Card10	2.22527455760544	0.0711844211613367
Card6	0.994703490747865	0.396792670888297
Carf	1.85717806561178	0.219673608646598
Carhsp1	0.698563932420655	0.171842700323788
Carkd	0.70770116753262	0.73451516577688
Carm1	0.664227398170112	0.64554479091756
Cars	0.0512660812918853	1
Cars2	Inf	1
Casc1	-1.18977160528234	0.385582683197217
Casc3	0.910542277361669	0.160798551461701
Casc4	-1.20750917297573	0.250438726210478
Casc5	Inf	0.155842199018978
Cask	-1.6313808168908	0.00508488201680045
Caskin1	0.903119279353562	0.481345880989723
Caskin2	-Inf	0.0399982493393517
Casp1	Inf	0.0437587941580826
Casp2	0.319153459674365	0.528589157847401
Casp3	-0.635306425666177	1
Casp6	-1.31644960938499	0.402489002172888
Casp8	-1.99406139135082	0.133562128694864
Casp8ap2	-0.957600322358192	0.0853485771022127
Casp9	0.242869792220502	0.940020565260678
Casq2	-0.217975700324231	0.89717369542615
Cast	1.14365841553483	0.0851145928549606
Catsperd	Inf	0.0503051934704697
Catsperg1	-Inf	0.110201852677633
Cbfa2t2	0.243263470288376	0.71576572054901
Cbfa2t3	0.92191554982726	0.387313246939971
Cbfb	-0.680059202486294	0.578201689829875
Cbl	-1.45660882487735	0.0235684130568008
Cbll1	-1.14982830450422	0.256077568882377
Cbln1	-1.2080922501313	0.299258359545179
Cbln3	1.02621230428605	0.612739575455109
Cbln4	-1.75599932318639	0.194296057202121
Cbr1	1.3402320931027	0.147445898163596
Cbs	-Inf	0.959142272506359
Cbwd1	0.0735723421437318	0.891655746866323
Cbx1	-0.47496742608695	0.918657907890081
Cbx2	-0.560932048907669	0.322255359634601
Cbx3	-0.856855610631324	0.701536169970299
Cbx4	-Inf	0.959863040768959
Cbx5	0.769997584041649	0.121737754939525
Cbx7	3.34781131961968	0.000532556213822299
Cby1	0.958319991352618	0.46967878043909
Cc2d1a	1.04551090382637	0.649741421048678
Cc2d1b	4.6666955219528	0.00305105475505043
Ccar1	2.01231276604697	0.0132173005225499
Ccar2	0.084207608989973	0.725381798232106
Ccbl1	-0.0620824208694574	0.65386120269875
Ccbl2	NA	NA
Ccdc101	-0.478304947147572	0.924588991416439
Ccdc104	3.43288874157974	6.35268510739344e-05
Ccdc107	3.10953778519662	0.02283128374651
Ccdc109b	1.46182858071669	0.0216985759934774
Ccdc11	0.546435890350118	0.397558608692756
Ccdc112	1.08137684023796	0.104533913588786
Ccdc114	-0.4560765203892	0.572081811560241
Ccdc115	2.21212279571592	4.52967976120612e-05
Ccdc117	-0.460799085553776	0.347989216329163
Ccdc12	0.580075607501618	0.513182243882791
Ccdc120	-0.0538680954243961	0.760991896320311
Ccdc122	0.694340327979136	0.439127565779584
Ccdc124	0.352936420251264	0.515151884130964
Ccdc126	3.88539941271706	0.00697283082305715
Ccdc127	-0.695511809431836	0.464705550773953
Ccdc130	0.663695965978606	0.226891996488748
Ccdc132	0.762512998896262	0.179009293014656
Ccdc134	Inf	0.364184671091097
Ccdc136	-0.0295300277986426	1
Ccdc137	-2.63782034005408	0.622410324102926
Ccdc138	1.86384825123116	0.0180306788951659
Ccdc14	-1.3823828500428	0.00633254368987337
Ccdc141	0.778371462556759	0.517984101304781
Ccdc15	1.72731535426923	0.0906368990090407
Ccdc157	-0.888156226476742	0.334407964522769
Ccdc158	0.753138103601877	0.351368945349945
Ccdc163	3.49083219444241	0.145777436273885
Ccdc166	-Inf	0.45655220991497
Ccdc167	0.516404794074702	0.670748921217495
Ccdc17	Inf	0.791371450067533
Ccdc171	2.21052083427411	0.0818254688813138
Ccdc173	0.857005996025283	0.644864776174573
Ccdc174	5.12231402606893	1.94540419463427e-05
Ccdc175	4.55293368565797	0.00629153878014576
Ccdc18	-2.01226525368336	0.0237078654000062
Ccdc181	2.65086830362911	0.00414719933696122
Ccdc186	-1.76472089257215	0.394614901422467
Ccdc19	1.47423887116215	0.47488599479593
Ccdc23	2.95274640351297	0.00161561980877064
Ccdc24	-0.636837350246511	0.420533912837519
Ccdc25	1.58611022851018	0.0504690692197289
Ccdc28a	-0.88591497297994	0.647600132852729
Ccdc28b	1.44337739277788	0.270621655154353
Ccdc3	-0.333075750865555	0.862673883646359
Ccdc32	Inf	0.623265592868802
Ccdc34	-0.279693884867007	0.530565262131023
Ccdc36	0.400663587339414	0.706468605522099
Ccdc38	1.37405598167525	0.10168256393744
Ccdc40	3.55926224526043	0.000323057683833272
Ccdc42	2.69604212228903	0.0251882154694359
Ccdc47	-0.185134554279855	0.765915425889578
Ccdc50	-0.745450662179992	0.149396947216084
Ccdc51	-2.52279862378787	0.70715252488815
Ccdc53	1.9569555953249	0.0470159425882806
Ccdc55	1.58667308313246	0.00470813445156315
Ccdc57	-0.714143987654596	1
Ccdc58	2.96860620945083	3.20458603470902e-05
Ccdc59	1.18390315203966	0.0518534658431234
Ccdc6	-0.330408290328096	0.441811642489137
Ccdc60	0.940790623062779	0.287476346514045
Ccdc61	-0.711745174333555	0.737625324740873
Ccdc62	1.27280907336871	0.0237351269477511
Ccdc65	2.17812473502307	0.244512310828105
Ccdc66	3.3765048391241	4.2164434474979e-05
Ccdc68	0.135486013807238	0.639828111933549
Ccdc69	-0.649465945348921	0.156034150505723
Ccdc71l	-0.269119446204722	0.696509709860922
Ccdc73	1.95585685274134	0.00932122157078721
Ccdc74a	1.57386401919646	0.0424275428088507
Ccdc77	-0.676123629761574	0.114364534438194
Ccdc78	0.154180948529002	0.865854191707952
Ccdc79	0.10660944857388	0.825409845534706
Ccdc82	-0.761211359880357	0.734281964650124
Ccdc84	0.148616213364561	0.915661626103349
Ccdc85a	-1.22552173867818	0.266879541098328
Ccdc85b	-1.80291592457572	0.216337265508123
Ccdc86	1.01670849119493	0.189174943898968
Ccdc88a	1.24159052358461	0.0901992453378847
Ccdc9	-1.15793577820359	0.502946795455386
Ccdc90b	-0.896790313375952	0.113305066179467
Ccdc91	-0.00610693785971779	0.604497159987441
Ccdc92	2.0520463535099	0.00350521561926653
Ccdc93	-0.19115795129655	0.986968706775139
Ccdc96	-Inf	0.0785653146649747
Ccdc97	0.18330589728803	0.891164374934117
Cchcr1	-Inf	0.552889720117211
Ccl25	5.88831425326176	0.0001715599806133
Ccl28	0.302941055694426	0.940857607389539
Ccl3	0.97725151694705	0.651094727768161
Ccl4	0.967582181133607	0.65130978775673
Ccl6	-0.320976042979173	1
Ccl9	1.63415776625168	0.752909526509407
Ccm2	6.43892365650642	0.00251997016560157
Ccna2	-0.578798664203608	0.149719384852969
Ccnb1	-0.639056538899498	0.158445333380702
Ccnb1ip1	4.6317338373867	3.09749833339076e-05
Ccnb2	1.07449757068165	0.139116164244915
Ccnb3	4.31360893712982	1.83494150800349e-05
Ccnc	1.19249806844717	0.068460940233842
Ccnd1	1.81736275260731	0.205752680101642
Ccnd3	-1.01041731759641	0.228330048679345
Ccndbp1	-0.314397598782308	0.459899985434313
Ccne1	-0.456799061716294	0.424144835984015
Ccne2	0.448173606738441	0.634913043638083
Ccnf	1.59249304894087	0.101037222951908
Ccng1	0.639891743163486	0.300279961139052
Ccng2	-1.30073142424826	0.271773935913315
Ccnh	2.22254717749029	0.0346324928973965
Ccni	0.700502758940051	0.126905705174878
Ccnj	-0.730452391445603	0.252211425240743
Ccnk	0.0725893746715709	0.553636918359968
Ccnl1	1.28656967954837	0.0479353483352123
Ccnl2	-0.269240435664376	0.564932873228104
Ccno	0.316650770755884	0.26168111213215
Ccnt1	1.43050019020268	0.0692088573487854
Ccnt2	-0.294016775130685	0.484837247200601
Ccny	-1.79503914000486	0.00602762374480577
Ccnyl1	-0.252750652523535	0.41389356920911
Ccp110	0.131063085506733	0.817059219303574
Ccpg1	0.580707022873789	0.359908131529601
Ccpg1os	0.906332025868729	0.409442828656003
Ccr3	-0.77110032724594	0.822259064603521
Ccrn4l	-1.08522438062011	0.0262639952896233
Ccs	-1.98034952943973	0.337692354742464
Ccsap	1.72970140803108	0.268206930666418
Ccser1	0.895458866676299	0.349398187340174
Ccser2	-0.668976643752924	0.122234801570723
Cct2	1.14936342449667	0.0852839303968624
Cct3	1.21681095545657	0.0121148450730887
Cct4	-0.507099682742882	0.511371131468573
Cct5	-0.984086133033979	0.55293101490849
Cct6a	-1.70558919767259	0.0446694937327599
Cct6b	-0.939791962587105	0.842824366109161
Cct7	-0.139892149405916	0.688227467316384
Cct8	-0.212394157688801	0.797599443464956
Ccz1	-0.0841051542541674	0.719601409387649
Cd151	0.608906399029389	0.251308514882065
Cd160	0.039065680204663	0.939927071892966
Cd163	-0.00794038028498742	1
Cd164	-0.463086434129841	0.436888899330779
Cd164l2	-0.19554428160411	0.647123899393476
Cd177	0.556559661186077	0.802868434933876
Cd1d1	1.84707577968373	0.0478778459097425
Cd200	2.09619555635811	0.0258757846861342
Cd209c	-1.97012621670062	0.0333189203509936
Cd209g	0.200800533529574	0.892789497090927
Cd22	Inf	0.270472726407218
Cd24a	Inf	1
Cd274	2.30001882787464	0.308302166278357
Cd2ap	-0.482614720946235	0.45733087915629
Cd2bp2	-0.118933901687745	0.886874136740236
Cd300a	-0.838728183562273	0.447049966410591
Cd300c	-0.3809605482356	0.776730028688916
Cd300lf	1.51594726621738	0.0756914607009697
Cd320	-1.35094785120136	0.136015220835146
Cd36	-0.335219085885758	0.50577135258632
Cd38	-0.828393838790138	0.603568656496596
Cd3eap	0.876869918601188	0.42614892730868
Cd4	2.81839457063751	0.000758706982955733
Cd47	NA	NA
Cd5	0.287210933261574	0.856229101754333
Cd53	1.51429418382645	0.72946544887377
Cd55	-0.158505497258226	0.95717910297689
Cd59a	1.55809520183971	0.0501574215796126
Cd59b	2.08493257706736	0.203478494524455
Cd5l	Inf	0.644476239962332
Cd63	-4.58669521354638	4.41664478482961e-09
Cd68	2.22176681510761	0.222647337978754
Cd69	3.49345789131895	0.00392146984292182
Cd7	1.6242898506046	0.302011512936123
Cd72	0.0222974573308408	0.939130495557781
Cd84	-1.43304039588301	0.307758281584476
Cd9	2.6177054390644	0.000216966099967252
Cd96	0.507719369501739	0.539516603763217
Cd97	0.847345302563606	0.714500606000371
Cd99l2	0.161102173707724	0.91814634702171
Cdadc1	-1.7320257514459	0.284417480307591
Cdan1	-0.578328468377759	0.155577541441617
Cdc123	1.39563399501712	0.0211747496466788
Cdc14a	-0.209581394151283	0.78341648867623
Cdc14b	0.655764378239087	0.178600285417838
Cdc16	0.430806959169965	0.509415964751246
Cdc20	0.730087300867182	0.400323198467316
Cdc23	0.142445419982858	0.860787516765085
Cdc25a	-0.840801280547527	0.299946478181462
Cdc25b	3.85370723967086	3.59165422701739e-08
Cdc25c	-3.1060631097256	0.526053508509844
Cdc26	-0.301854180941113	0.443387752444812
Cdc27	-0.978622431402383	0.0800063343018722
Cdc34	0.617319170944709	0.414733608013113
Cdc37	0.257012849091692	0.847845918730634
Cdc37l1	-0.399276272144216	0.235642033199933
Cdc40	-1.23372454090549	0.035182839693685
Cdc42	0.821417104756863	0.117363893936499
Cdc42bpa	1.49660357012063	0.12047638694442
Cdc42bpb	1.39153550765415	0.145369781683056
Cdc42bpg	1.13172867064584	0.341754641176898
Cdc42ep2	0.0597001858237645	0.758718743456029
Cdc42ep3	-0.850966467256659	0.399004580355366
Cdc42ep4	2.73735642955365	0.0916810099968021
Cdc42se1	-0.644118974434845	0.164712652118671
Cdc42se2	0.338431179666268	0.705154853452546
Cdc45	-0.328113189454811	0.223705622457007
Cdc5l	-2.29362138385723	0.111910558886173
Cdc6	-1.13735178996492	0.195053533629758
Cdc7	-0.631582369159294	0.261361542733756
Cdc73	0.939786446566681	0.144918897629605
Cdca2	0.268389545155188	0.634510432169617
Cdca3	-0.35340144193557	0.385247058505854
Cdca4	-0.743879425512752	0.086313731181198
Cdca5	-2.16522274989585	0.000279448532190725
Cdca7	0.0693557308288339	0.590668242965072
Cdca7l	0.0577544573659345	0.836826739319323
Cdca8	1.05235233591626	0.276280488103889
Cdh1	-1.04071934112567	0.0854742493084735
Cdh13	4.78538953520405	0.0473446529529758
Cdh16	2.05463258587124	0.13058422444876
Cdh2	-0.23750581645188	0.587391862127797
Cdh20	0.151772082702474	0.911136391463456
Cdh3	0.576628691732687	0.736543995257419
Cdh4	-1.58509656202192	0.0309527509871487
Cdh9	-0.207908781328472	1
Cdip1	-0.422608513563625	0.466153079405566
Cdipt	2.63556573194197	2.35732632626305e-05
Cdk1	0.72793999498837	0.115908825347457
Cdk11b	2.94611266965672	0.0139327669708456
Cdk12	0.399205996603855	0.434483331684246
Cdk13	-0.755753599205102	0.199993963377036
Cdk14	3.24538475461914	0.00216609972689563
Cdk16	0.716185989045898	0.383237675988136
Cdk17	-0.00319410564144006	1
Cdk19	-1.31241408961378	0.451247274981685
Cdk2	6.1260277790838	3.19070560282681e-06
Cdk20	0.193157767060646	0.308653381942104
Cdk2ap1	0.921242124783025	0.11970912760842
Cdk2ap2	0.768961154705914	0.192327096414241
Cdk4	-2.88356641175543	0.106795584318946
Cdk5r1	-0.632479354727232	1
Cdk5rap1	1.42839848432801	0.0877307000128903
Cdk5rap2	1.37037646028146	0.384256497872441
Cdk5rap3	1.14392423672978	0.511506745134908
Cdk7	1.20185941955728	0.00707671598163511
Cdk8	1.14832299426324	0.029060266552341
Cdk9	-0.664136846797	0.204986671552218
Cdkal1	2.30990348212652	0.234009327698678
Cdkl2	-1.26408438006674	0.0132324311187457
Cdkl4	-1.58289699325927	0.0714768975682848
Cdkn1a	1.53271690577457	0.260678929419415
Cdkn1b	1.67446033076081	0.057228603467174
Cdkn1c	-1.4003167571872	0.690141040975386
Cdkn2aip	1.09985465123006	0.0331544705339855
Cdkn2aipnl	-0.48371094463299	0.342422002935101
Cdkn2c	0.519043465614829	0.722811692482378
Cdkn2d	1.15474804067365	0.285503884328258
Cdnf	-0.337923107831523	0.927425184314707
Cdo1	1.15300878655016	0.0325878601079876
Cdon	-2.40375015867322	0.0115194317423401
Cdpf1	7.32281910455904	1.35393784781615e-05
Cdr2	-1.16623426394078	0.0366584397407842
Cdr2l	-1.4711330008524	0.411059110678086
Cds1	-0.234655845345766	0.707814608432133
Cds2	-0.801633441992679	0.217320499430816
Cdsn	-0.144185529904598	1
Cdt1	1.00811351967888	0.0576338735838072
Cdv3	-0.289210170899397	0.800364155169418
Cdyl	-0.276531161042852	0.394926837472719
Cdyl2	1.98457025886491	0.0917954347171691
Ceacam1	4.71396351160606	0.000163245074619057
Ceacam10	1.55923551489926	0.0663230694346581
Ceacam2	4.05343244048858	0.000282050125737592
Ceacam20	0.845539502154383	0.474440293365533
Ceacam5	1.55869694421101	0.375599314112318
Cebpa	-Inf	0.959655278482871
Cebpb	5.74465654539067	0.00532126785049355
Cebpd	0.955477088798133	0.193164336803162
Cebpg	-1.23528495224079	0.0136704359673476
Cebpz	0.410961261486372	0.475932763721731
Cebpzos	-0.019024951141005	0.914762758371794
Cecr2	-1.45049631687559	0.00264721957306035
Cela1	3.45333889024731	0.0141164997233405
Celf1	1.55855994468592	0.00931464787013425
Celf2	-0.6080304357985	0.2005094701316
Celf3	5.12502171656592	0.00672706861250816
Celsr1	-1.02839639050805	0.0896680281683416
Cenpa	-1.32043017077663	0.0100775478272703
Cenpc1	-0.525391194436946	0.48439649479404
Cenpe	0.208471392722407	0.887179686644938
Cenpf	0.740458300668175	0.0295286865950553
Cenph	-0.0581037651945682	0.738432417875039
Cenpi	-0.620142634585713	0.369557979012769
Cenpj	-0.652036269274144	0.138215158835924
Cenpk	1.60672012726692	0.00360959379422139
Cenpl	1.65370327589116	0.126603990870157
Cenpm	Inf	0.000179580900028422
Cenpn	-0.709751029738573	0.205353542648502
Cenpo	-2.19192321728587	0.00331277384710594
Cenpp	-0.613700539737762	0.991826926710984
Cenpq	6.69622131331893	1.15355421337218e-05
Cenpt	-0.0846661540893936	0.487028376269127
Cenpu	-1.27171102268312	0.0268967902779954
Cenpv	0.39794259279619	0.542109519775678
Cenpw	1.30316575776392	0.0172904561510894
Cep104	0.42276499039077	0.611699934348861
Cep120	0.427144509605628	0.357235958530545
Cep128	-0.824806928908169	0.479169656898341
Cep135	0.062562387397225	0.937848310679907
Cep152	-0.491568586905546	0.63778816124748
Cep162	1.7024242041286	0.208075186794454
Cep164	-0.410381040220395	0.813592805405338
Cep170	0.751493938725318	0.181811729112495
Cep170b	-0.916728493190226	0.0939132146931595
Cep19	0.687547703241347	0.265222330812231
Cep192	0.0037813866976746	0.959049845328662
Cep250	-Inf	0.962298700066904
Cep290	1.90573596006859	0.423160449526632
Cep350	1.83400992961017	0.0570663855652629
Cep41	-0.014216713657045	0.806398276260341
Cep44	-1.80105758652444	0.00946093549706387
Cep55	0.510585472981889	0.652086947179452
Cep57	1.52922939379432	0.0404803220376932
Cep57l1	-0.160134368730221	0.821692324454429
Cep63	2.35608877232473	0.202434953083179
Cep68	-1.58188381860311	0.0459801957611024
Cep70	-0.667979993649874	0.111706579552342
Cep72	Inf	1
Cep76	0.634314216244213	0.690038860262386
Cep78	0.688171576234932	0.464177949358665
Cep83	-0.111618691680704	0.801156398782496
Cep83os	-1.09512185512873	0.202151481549667
Cep85	1.76952754383518	0.00504888392693229
Cep85l	Inf	0.639369269674562
[truncated: 9,123 more rows]
