# Supplementary figures and images for: Maternal LSD1/KDM1A is an essential regulator of chromatin and transcription landscapes during zygotic genome activation
Source: eLife journal article supplement (doi:10.7554/elife.08851), 2016-02-02

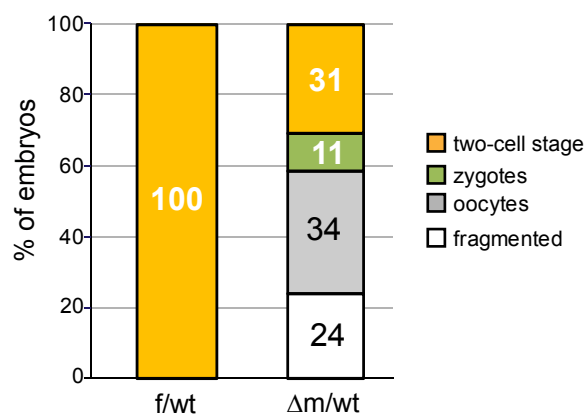

|                          | f/wt | Δm/wt |
|--------------------------|------|-------|
| fragmented               | 0    | 7     |
| oocytes                  | 0    | 10    |
| zygotes                  | 0    | 3     |
| two-cell                 | 31   | 9     |
| n total oocytes /embryos | 31   | 29    |
| n females                | 6    | 7     |

Supplement: supp [file elife-08851-supp-v1.zip › elife_poa_e08851_Figure_1_figure_supplement_2.pdf]

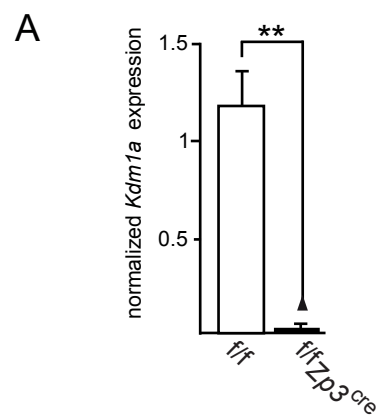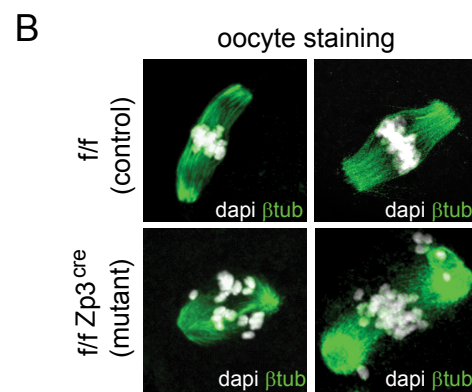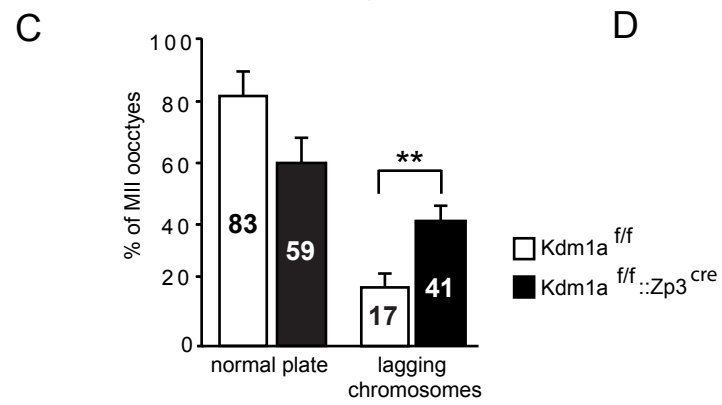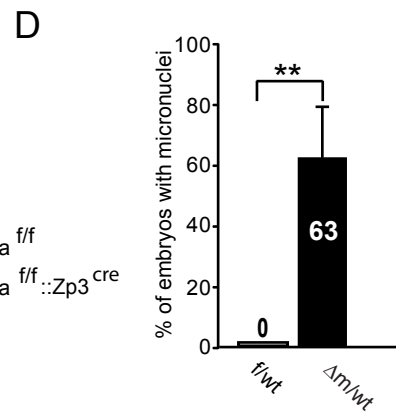

Supplement: supp [file elife-08851-supp-v1.zip › elife_poa_e08851_Figure_1_figure_supplement_1.pdf]

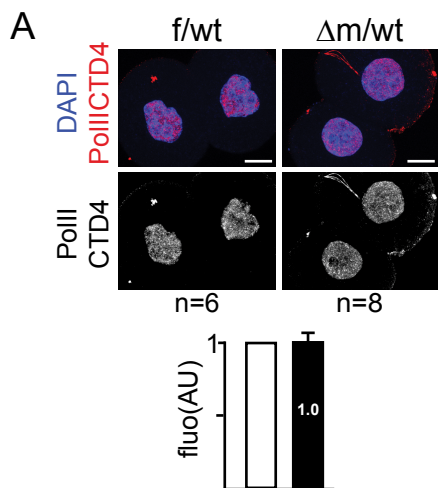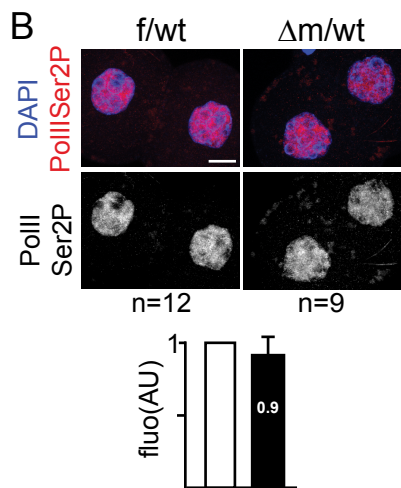

**C**

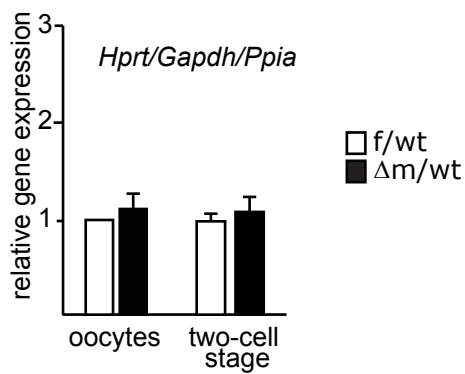

Supplement: supp [file elife-08851-supp-v1.zip › elife_poa_e08851_Figure_4_figure_supplement_1.pdf]

A

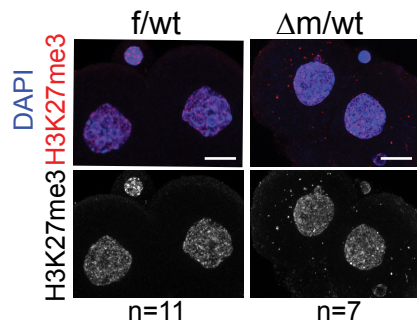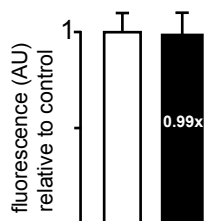

B

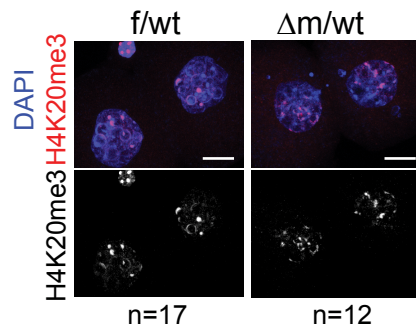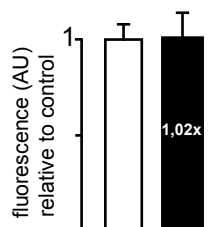

C

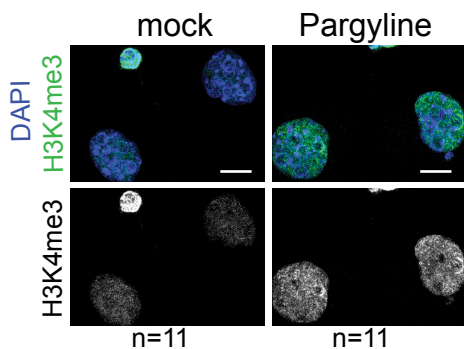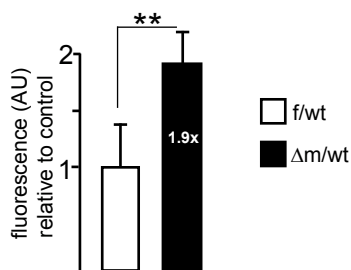

D

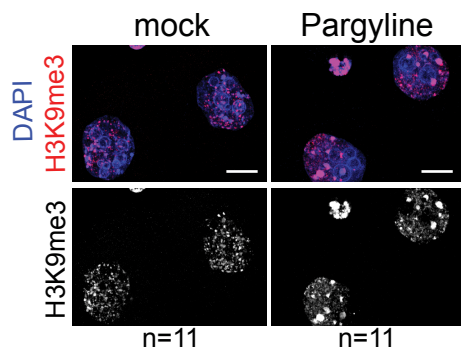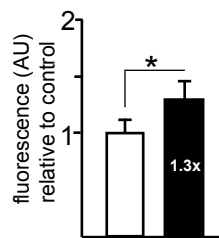

Supplement: supp [file elife-08851-supp-v1.zip › elife_poa_e08851_Figure_3_figure_supplement_1.pdf]

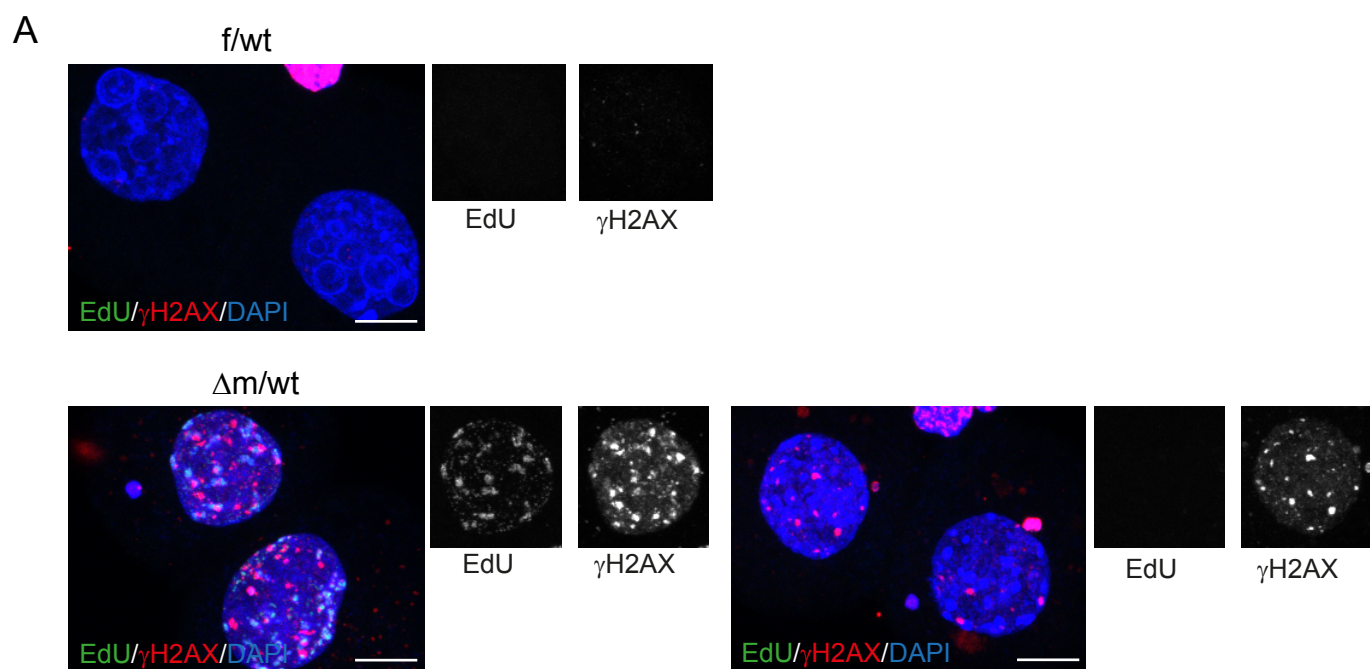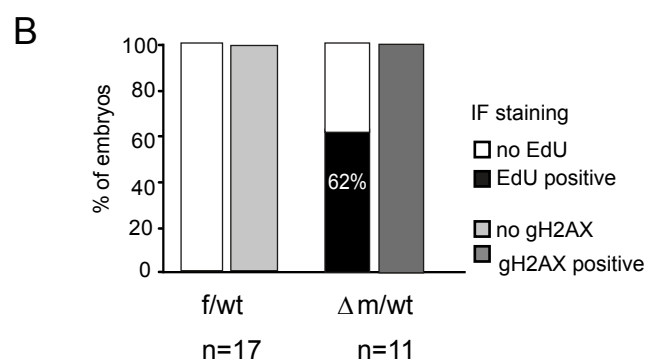

Supplement: supp [file elife-08851-supp-v1.zip › elife_poa_e08851_Figure_5_figure_supplement_2.pdf]

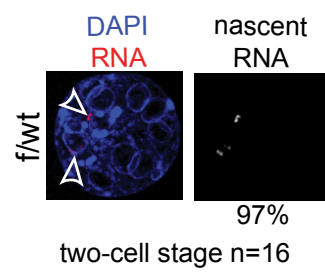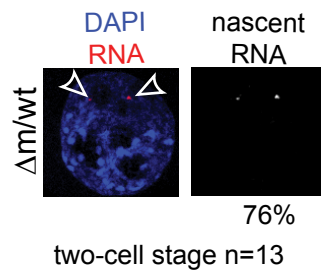

Supplement: supp [file elife-08851-supp-v1.zip › elife_poa_e08851_Figure_5_figure_supplement_1.pdf]
